# Supplementary material for: The Causal Association between Alcohol, Smoking, Coffee Consumption, and the Risk of Arthritis: A Meta-Analysis of Mendelian Randomization Studies
Source: MDPI journal article supplement (doi:10.3390/nu15235009), 2023-12-04
Supplement: s1 [file s1]

## *Supplementary Material*

|                                                                                                       |    |
|-------------------------------------------------------------------------------------------------------|----|
| Table S1. Results of MR analysis of alcoholic drinks per week on five arthritis outcomes. ....        | 2  |
| Table S2. Results of MR analysis of alcohol intake frequency on five arthritis outcomes. ....         | 3  |
| Table S3. Results of MR analysis of smoking initiation on five arthritis outcomes. ....               | 4  |
| Table S4. Results of MR analysis of Coffee intake on five arthritis outcomes.....                     | 5  |
| Table S5. Sensitivity analysis of MR results. ....                                                    | 6  |
| Table S6. Details of SNPs used for MR analysis of alcoholic drinks per week on HOA. ....              | 7  |
| Table S7. Details of SNPs used for MR analysis of alcoholic drinks per week on KOA. ....              | 8  |
| Table S8. Details of SNPs used for MR analysis of alcoholic drinks per week on RA(M13). ....          | 9  |
| Table S9. Details of SNPs used for MR analysis of alcoholic drinks per week on Seronegative RA. ....  | 10 |
| Table S10. Details of SNPs used for MR analysis of alcoholic drinks per week on Seropositive RA. .... | 11 |
| Table S11. Details of SNPs used for MR analysis of alcohol intake frequency on HOA.....               | 13 |
| Table S12. Details of SNPs used for MR analysis of alcohol intake frequency on KOA. ....              | 16 |
| Table S13. Details of SNPs used for MR analysis of alcohol intake frequency on RA(M13).....           | 18 |
| Table S14. Details of SNPs used for MR analysis of alcohol intake frequency on Seronegative RA. ....  | 22 |
| Table S15. Details of SNPs used for MR analysis of alcohol intake frequency on Seropositive RA. ....  | 25 |
| Table S16. Details of SNPs used for MR analysis of smoking initiation on HOA.....                     | 29 |
| Table S17. Details of SNPs used for MR analysis of smoking initiation on KOA. ....                    | 32 |
| Table S18. Details of SNPs used for MR analysis of smoking initiation on RA(M13).....                 | 34 |
| Table S19. Details of SNPs used for MR analysis of smoking initiation on Seronegative RA. ....        | 37 |
| Table S20. Details of SNPs used for MR analysis of smoking initiation on Seropositive RA. ....        | 41 |
| Table S21. Details of SNPs used for MR analysis of coffee intake on HOA.....                          | 44 |
| Table S22. Details of SNPs used for MR analysis of coffee intake on KOA. ....                         | 45 |
| Table S23. Details of SNPs used for MR analysis of coffee intake on RA(M13).....                      | 46 |
| Table S24. Details of SNPs used for MR analysis of coffee intake on Seronegative RA. ....             | 48 |
| Table S25. Details of SNPs used for MR analysis of coffee intake on Seropositive RA. ....             | 49 |

**Table S1. Results of MR analysis of alcoholic drinks per week on five arthritis outcomes.**

| outcome         | method          | nSNP | OR       | 95%CI (low) | 95%CI (up) | pval  |
|-----------------|-----------------|------|----------|-------------|------------|-------|
| HOA             | IVW             | 19   | 0.757    | 0.509       | 1.125      | 0.168 |
|                 | MR Egger        | 19   | 0.408    | 0.126       | 1.325      | 0.154 |
|                 | Weighted median | 19   | 0.807    | 0.516       | 1.263      | 0.348 |
|                 | Weighted mode   | 19   | 0.501    | 0.282       | 0.888      | 0.029 |
| KOA             | IVW             | 21   | 1.256909 | 0.898       | 1.759      | 0.182 |
|                 | MR Egger        | 21   | 1.171677 | 0.400       | 3.432      | 0.776 |
|                 | Weighted median | 21   | 1.002451 | 0.708       | 1.420      | 0.989 |
|                 | Weighted mode   | 21   | 0.894365 | 0.588       | 1.361      | 0.608 |
| RA(M13)         | IVW             | 33   | 0.997041 | 0.564       | 1.764      | 0.992 |
|                 | MR Egger        | 33   | 1.099456 | 0.290       | 4.167      | 0.890 |
|                 | Weighted median | 33   | 1.322095 | 0.633       | 2.763      | 0.458 |
|                 | Weighted mode   | 33   | 1.560731 | 0.569       | 4.280      | 0.393 |
| Seronegative RA | IVW             | 33   | 0.910097 | 0.391       | 2.116      | 0.827 |
|                 | MR Egger        | 33   | 0.405303 | 0.059       | 2.802      | 0.367 |
|                 | Weighted median | 33   | 0.73729  | 0.234       | 2.323      | 0.603 |
|                 | Weighted mode   | 33   | 0.535519 | 0.108       | 2.650      | 0.450 |
| Seropositive RA | IVW             | 33   | 0.745118 | 0.411       | 1.350      | 0.332 |
|                 | MR Egger        | 33   | 0.882867 | 0.219       | 3.553      | 0.862 |
|                 | Weighted median | 33   | 0.97665  | 0.437       | 2.184      | 0.954 |
|                 | Weighted mode   | 33   | 1.222071 | 0.404       | 3.696      | 0.725 |

HOA: Hip osteoarthritis; KOA: Knee osteoarthritis; RA: Rheumatoid arthritis; OR: Odds ratio; CI: Confidence interval; pval: significance P-value.

**Table S2. Results of MR analysis of alcohol intake frequency on five arthritis outcomes.**

| outcome         | method          | nSNP | OR    | 95%CI (low) | 95%CI (up) | pval  |
|-----------------|-----------------|------|-------|-------------|------------|-------|
| HOA             | IVW             | 73   | 1.057 | 0.930       | 1.201      | 0.395 |
|                 | MR Egger        | 73   | 1.544 | 1.005       | 2.371      | 0.051 |
|                 | Weighted median | 73   | 1.164 | 0.987       | 1.372      | 0.072 |
|                 | Weighted mode   | 73   | 1.514 | 1.134       | 2.021      | 0.006 |
| KOA             | IVW             | 72   | 1.001 | 0.893       | 1.122      | 0.987 |
|                 | MR Egger        | 72   | 0.994 | 0.674       | 1.467      | 0.977 |
|                 | Weighted median | 72   | 1.073 | 0.928       | 1.241      | 0.343 |
|                 | Weighted mode   | 72   | 1.062 | 0.854       | 1.320      | 0.593 |
| RA(M13)         | IVW             | 90   | 1.078 | 0.870       | 1.335      | 0.493 |
|                 | MR Egger        | 90   | 1.167 | 0.601       | 2.267      | 0.650 |
|                 | Weighted median | 90   | 1.050 | 0.769       | 1.432      | 0.759 |
|                 | Weighted mode   | 90   | 1.471 | 0.780       | 2.775      | 0.237 |
| Seronegative RA | IVW             | 92   | 1.009 | 0.716       | 1.421      | 0.959 |
|                 | MR Egger        | 92   | 1.804 | 0.626       | 5.201      | 0.278 |
|                 | Weighted median | 92   | 1.304 | 0.768       | 2.216      | 0.326 |
|                 | Weighted mode   | 92   | 1.562 | 0.691       | 3.530      | 0.286 |
| Seropositive RA | IVW             | 92   | 1.128 | 0.875       | 1.455      | 0.351 |
|                 | MR Egger        | 92   | 1.198 | 0.541       | 2.654      | 0.657 |
|                 | Weighted median | 92   | 1.276 | 0.904       | 1.802      | 0.165 |
|                 | Weighted mode   | 92   | 1.410 | 0.769       | 2.586      | 0.269 |

HOA: Hip osteoarthritis; KOA: Knee osteoarthritis; RA: Rheumatoid arthritis; OR: Odds ratio; CI: Confidence interval; pval: significance P-value.

**Table S3. Results of MR analysis of smoking initiation on five arthritis outcomes.**

| outcome         | method          | nSNP | OR    | 95%CI (low) | 95%CI (up) | pval  |
|-----------------|-----------------|------|-------|-------------|------------|-------|
| HOA             | IVW             | 65   | 1.066 | 0.942       | 1.207      | 0.311 |
|                 | MR Egger        | 65   | 1.332 | 0.663       | 2.677      | 0.424 |
|                 | Weighted median | 65   | 1.043 | 0.900       | 1.208      | 0.580 |
|                 | Weighted mode   | 65   | 1.058 | 0.792       | 1.414      | 0.703 |
| KOA             | IVW             | 62   | 1.003 | 0.907       | 1.108      | 0.961 |
|                 | MR Egger        | 62   | 1.260 | 0.734       | 2.162      | 0.405 |
|                 | Weighted median | 62   | 1.012 | 0.887       | 1.154      | 0.860 |
|                 | Weighted mode   | 62   | 1.133 | 0.923       | 1.392      | 0.236 |
| RA(M13)         | IVW             | 83   | 1.393 | 1.148       | 1.691      | 0.001 |
|                 | MR Egger        | 83   | 1.042 | 0.394       | 2.757      | 0.935 |
|                 | Weighted median | 83   | 1.521 | 1.154       | 2.004      | 0.003 |
|                 | Weighted mode   | 83   | 1.656 | 0.949       | 2.892      | 0.080 |
| Seronegative RA | IVW             | 83   | 1.352 | 0.994       | 1.839      | 0.055 |
|                 | MR Egger        | 83   | 0.716 | 0.153       | 3.346      | 0.672 |
|                 | Weighted median | 83   | 1.378 | 0.890       | 2.134      | 0.151 |
|                 | Weighted mode   | 83   | 1.440 | 0.548       | 3.785      | 0.461 |
| Seropositive RA | IVW             | 83   | 1.320 | 1.070       | 1.627      | 0.009 |
|                 | MR Egger        | 83   | 0.623 | 0.219       | 1.773      | 0.378 |
|                 | Weighted median | 83   | 1.341 | 0.987       | 1.822      | 0.060 |
|                 | Weighted mode   | 83   | 1.333 | 0.705       | 2.523      | 0.379 |

HOA: Hip osteoarthritis; KOA: Knee osteoarthritis; RA: Rheumatoid arthritis; OR: Odds ratio; CI: Confidence interval; pval: significance P-value.

**Table S4. Results of MR analysis of Coffee intake on five arthritis outcomes.**

| outcome         | method          | nSNP | OR    | 95%CI (low) | 95%CI (up) | pval  |
|-----------------|-----------------|------|-------|-------------|------------|-------|
| HOA             | IVW             | 25   | 0.895 | 0.582       | 1.374      | 0.611 |
|                 | MR Egger        | 25   | 0.384 | 0.104       | 1.416      | 0.164 |
|                 | Weighted median | 25   | 1.017 | 0.603       | 1.716      | 0.949 |
|                 | Weighted mode   | 25   | 1.214 | 0.341       | 4.327      | 0.767 |
| KOA             | IVW             | 26   | 0.988 | 0.735       | 1.328      | 0.935 |
|                 | MR Egger        | 26   | 0.622 | 0.247       | 1.565      | 0.323 |
|                 | Weighted median | 26   | 0.848 | 0.577       | 1.247      | 0.402 |
|                 | Weighted mode   | 26   | 0.655 | 0.306       | 1.399      | 0.285 |
| RA(M13)         | IVW             | 38   | 1.226 | 0.721       | 2.084      | 0.453 |
|                 | MR Egger        | 38   | 0.976 | 0.332       | 2.870      | 0.965 |
|                 | Weighted median | 38   | 1.002 | 0.511       | 1.964      | 0.996 |
|                 | Weighted mode   | 38   | 1.086 | 0.512       | 2.306      | 0.831 |
| Seronegative RA | IVW             | 38   | 2.231 | 1.037       | 4.797      | 0.040 |
|                 | MR Egger        | 38   | 2.798 | 0.600       | 13.049     | 0.199 |
|                 | Weighted median | 38   | 4.040 | 1.354       | 12.056     | 0.012 |
|                 | Weighted mode   | 38   | 2.960 | 0.920       | 9.524      | 0.077 |
| Seropositive RA | IVW             | 38   | 1.180 | 0.621       | 2.243      | 0.613 |
|                 | MR Egger        | 38   | 0.773 | 0.211       | 2.836      | 0.701 |
|                 | Weighted median | 38   | 1.423 | 0.631       | 3.211      | 0.395 |
|                 | Weighted mode   | 38   | 1.042 | 0.449       | 2.419      | 0.924 |

HOA: Hip osteoarthritis; KOA: Knee osteoarthritis; RA: Rheumatoid arthritis; OR: Odds ratio; CI: Confidence interval; pval: significance P-value.

**Table S5. Sensitivity analysis of MR results.**

|            |                 | Heterogeneity Test        |          | Pleiotropy Test |                 | MR-PRESSO       |
|------------|-----------------|---------------------------|----------|-----------------|-----------------|-----------------|
|            |                 | Cochran's Q-Test(p-value) |          | I <sup>2</sup>  | Egger Intercept | Distortion test |
| Exposure   | Outcome         | IVW                       | MR-Egger | IVW             | p-value         | Outliers        |
| Alcohol(a) | HOA             | <0.05                     | <0.05    | 0.48            | 0.29            | NA              |
|            | KOA             | <0.05                     | <0.05    | 0.60            | 0.89            | NA              |
|            | RA(M13)         | 0.06                      | <0.05    | 0.29            | 0.87            | NA              |
|            | Seronegative RA | 0.35                      | 0.34     | 0.07            | 0.37            | NA              |
|            | Seropositive RA | 0.25                      | 0.21     | 0.14            | 0.79            | NA              |
| Alcohol(b) | HOA             | <0.05                     | <0.05    | 0.33            | 0.07            | NA              |
|            | KOA             | <0.05                     | <0.05    | 0.47            | 0.97            | NA              |
|            | RA(M13)         | 0.14                      | 0.12     | 0.14            | 0.80            | NA              |
|            | Seronegative RA | 0.30                      | 0.31     | 0.07            | 0.26            | NA              |
|            | Seropositive RA | <0.05                     | <0.05    | 0.22            | 0.88            | NA              |
| smoking    | HOA             | <0.05                     | <0.05    | 0.38            | 0.53            | NA              |
|            | KOA             | <0.05                     | <0.05    | 0.42            | 0.40            | NA              |
|            | RA(M13)         | 0.19                      | 0.18     | 0.12            | 0.55            | NA              |
|            | Seronegative RA | 0.98                      | 0.98     | 0.00            | 0.41            | NA              |
|            | Seropositive RA | 0.46                      | 0.49     | 0.01            | 0.16            | NA              |
| Coffee     | HOA             | <0.05                     | <0.05    | 0.39            | 0.19            | NA              |
|            | KOA             | 0.17                      | 0.17     | 0.21            | 0.31            | NA              |
|            | RA(M13)         | 0.06                      | 0.05     | 0.27            | 0.64            | NA              |
|            | Seronegative RA | 0.77                      | 0.73     | 0.00            | 0.74            | NA              |

|  |                 |       |       |      |      |    |
|--|-----------------|-------|-------|------|------|----|
|  | Seropositive RA | <0.05 | <0.05 | 0.35 | 0.48 | NA |
|--|-----------------|-------|-------|------|------|----|

Alcohol(a): Alcoholic drinks per week; Alcohol(b): Alcohol intake frequency; HOA: Hip osteoarthritis; KOA: Knee osteoarthritis; RA: Rheumatoid arthritis;

**Table S6. Details of SNPs used for MR analysis of alcoholic drinks per week on HOA.**

| chr | pos       | SNP        | effect_allele | other_allele | beta    | eaf    | se       | pval     | R <sup>2</sup> | F      |
|-----|-----------|------------|---------------|--------------|---------|--------|----------|----------|----------------|--------|
| 2   | 27730940  | rs1260326  | C             | T            | 0.0238  | 0.595  | 1.98E-03 | 3.33E-33 | 2.73E-04       | 145.51 |
| 2   | 44271496  | rs75120545 | T             | C            | -0.0328 | 0.022  | 5.67E-03 | 7.59E-09 | 4.63E-05       | 21.96  |
| 2   | 45141180  | rs494904   | C             | T            | 0.0151  | 0.429  | 1.96E-03 | 1.41E-14 | 1.11E-04       | 59.21  |
| 2   | 63269604  | rs6739804  | C             | T            | -0.0130 | 0.66   | 2.08E-03 | 4.72E-10 | 7.55E-05       | 40.18  |
| 4   | 39413780  | rs28712821 | A             | G            | 0.0283  | 0.594  | 1.97E-03 | 1.10E-46 | 3.87E-04       | 203.61 |
| 4   | 42117559  | rs16854020 | A             | G            | 0.0181  | 0.127  | 2.91E-03 | 4.82E-10 | 7.25E-05       | 38.69  |
| 4   | 100279889 | rs78234152 | A             | G            | 0.0277  | 0.0986 | 3.07E-03 | 2.18E-19 | 1.36E-04       | 72.61  |
| 5   | 155902003 | rs55872084 | T             | G            | 0.0127  | 0.218  | 2.27E-03 | 1.98E-08 | 5.53E-05       | 29.27  |
| 7   | 103812171 | rs2299409  | A             | G            | -0.0106 | 0.493  | 1.93E-03 | 4.80E-08 | 5.57E-05       | 29.75  |
| 7   | 153489725 | rs6969458  | A             | G            | 0.0127  | 0.459  | 1.94E-03 | 5.20E-11 | 8.02E-05       | 40.87  |
| 9   | 108755622 | rs55932213 | G             | A            | 0.0125  | 0.701  | 2.22E-03 | 1.80E-08 | 6.53E-05       | 33.67  |
| 11  | 113412443 | rs4309187  | C             | A            | 0.0148  | 0.697  | 2.09E-03 | 1.37E-12 | 9.24E-05       | 49.08  |
| 11  | 113655696 | rs17542254 | G             | A            | 0.0131  | 0.251  | 2.15E-03 | 8.96E-10 | 6.49E-05       | 34.67  |
| 12  | 92081800  | rs1387766  | A             | G            | -0.0108 | 0.622  | 1.98E-03 | 4.79E-08 | 5.51E-05       | 29.50  |
| 14  | 57281154  | rs962961   | T             | C            | -0.0122 | 0.329  | 2.05E-03 | 2.78E-09 | 6.56E-05       | 35.02  |
| 16  | 72338507  | rs79616692 | C             | G            | 0.0188  | 0.11   | 3.15E-03 | 2.38E-09 | 6.93E-05       | 36.68  |
| 16  | 73912503  | rs11860773 | C             | T            | -0.0150 | 0.176  | 2.44E-03 | 8.35E-10 | 6.53E-05       | 33.66  |
| 16  | 85721809  | rs13332432 | G             | C            | 0.0140  | 0.296  | 2.14E-03 | 5.94E-11 | 8.17E-05       | 42.26  |
| 17  | 7733833   | rs34121753 | G             | A            | 0.0111  | 0.532  | 1.95E-03 | 1.39E-08 | 6.10E-05       | 31.62  |

**Table S7. Details of SNPs used for MR analysis of alcoholic drinks per week on KOA.**

| chr | pos       | SNP        | effect_allele | other_allele | beta    | eaf    | se       | pval     | R <sup>2</sup> | F      |
|-----|-----------|------------|---------------|--------------|---------|--------|----------|----------|----------------|--------|
| 2   | 27730940  | rs1260326  | C             | T            | 0.0238  | 0.595  | 1.98E-03 | 3.33E-33 | 2.73E-04       | 145.51 |
| 2   | 44271496  | rs75120545 | T             | C            | -0.0328 | 0.022  | 5.67E-03 | 7.59E-09 | 4.63E-05       | 21.96  |
| 2   | 45141180  | rs494904   | C             | T            | 0.0151  | 0.429  | 1.96E-03 | 1.41E-14 | 1.11E-04       | 59.21  |
| 2   | 63269604  | rs6739804  | C             | T            | -0.0130 | 0.66   | 2.08E-03 | 4.72E-10 | 7.55E-05       | 40.18  |
| 4   | 39413780  | rs28712821 | A             | G            | 0.0283  | 0.594  | 1.97E-03 | 1.10E-46 | 3.87E-04       | 203.61 |
| 4   | 42117559  | rs16854020 | A             | G            | 0.0181  | 0.127  | 2.91E-03 | 4.82E-10 | 7.25E-05       | 38.69  |
| 4   | 100279889 | rs78234152 | A             | G            | 0.0277  | 0.0986 | 3.07E-03 | 2.18E-19 | 1.36E-04       | 72.61  |
| 5   | 155902003 | rs55872084 | T             | G            | 0.0127  | 0.218  | 2.27E-03 | 1.98E-08 | 5.53E-05       | 29.27  |
| 7   | 103812171 | rs2299409  | A             | G            | -0.0106 | 0.493  | 1.93E-03 | 4.80E-08 | 5.57E-05       | 29.75  |
| 7   | 153489725 | rs6969458  | A             | G            | 0.0127  | 0.459  | 1.94E-03 | 5.20E-11 | 8.02E-05       | 40.87  |
| 9   | 108755622 | rs55932213 | G             | A            | 0.0125  | 0.701  | 2.22E-03 | 1.80E-08 | 6.53E-05       | 33.67  |
| 11  | 113412443 | rs4309187  | C             | A            | 0.0148  | 0.697  | 2.09E-03 | 1.37E-12 | 9.24E-05       | 49.08  |
| 11  | 113655696 | rs17542254 | G             | A            | 0.0131  | 0.251  | 2.15E-03 | 8.96E-10 | 6.49E-05       | 34.67  |
| 12  | 92081800  | rs1387766  | A             | G            | -0.0108 | 0.622  | 1.98E-03 | 4.79E-08 | 5.51E-05       | 29.50  |
| 14  | 57281154  | rs962961   | T             | C            | -0.0122 | 0.329  | 2.05E-03 | 2.78E-09 | 6.56E-05       | 35.02  |
| 16  | 72338507  | rs79616692 | C             | G            | 0.0188  | 0.11   | 3.15E-03 | 2.38E-09 | 6.93E-05       | 36.68  |
| 16  | 73912503  | rs11860773 | C             | T            | -0.0150 | 0.176  | 2.44E-03 | 8.35E-10 | 6.53E-05       | 33.66  |
| 16  | 85721809  | rs13332432 | G             | C            | 0.0140  | 0.296  | 2.14E-03 | 5.94E-11 | 8.17E-05       | 42.26  |
| 17  | 7733833   | rs34121753 | G             | A            | 0.0111  | 0.532  | 1.95E-03 | 1.39E-08 | 6.10E-05       | 31.62  |
| 17  | 44189858  | rs76640332 | A             | G            | -0.0210 | 0.204  | 2.39E-03 | 1.47E-18 | 1.43E-04       | 73.82  |
| 19  | 49211969  | rs676388   | C             | T            | 0.0151  | 0.494  | 1.93E-03 | 5.49E-15 | 1.14E-04       | 60.63  |

**Table S8. Details of SNPs used for MR analysis of alcoholic drinks per week on RA(M13).**



| chr | pos       | SNP        | effect_allele | other_allele | beta    | eaf    | se       | pval      | R <sup>2</sup> | F       |
|-----|-----------|------------|---------------|--------------|---------|--------|----------|-----------|----------------|---------|
| 1   | 173848808 | rs28680958 | A             | G            | -0.0136 | 0.23   | 2.37E-03 | 9.78E-09  | 6.54E-05       | 34.78   |
| 2   | 27730940  | rs1260326  | C             | T            | 0.0238  | 0.595  | 1.98E-03 | 3.33E-33  | 2.73E-04       | 145.51  |
| 2   | 44271496  | rs75120545 | T             | C            | -0.0328 | 0.022  | 5.67E-03 | 7.59E-09  | 4.63E-05       | 21.96   |
| 2   | 45141180  | rs494904   | C             | T            | 0.0151  | 0.429  | 1.96E-03 | 1.41E-14  | 1.11E-04       | 59.21   |
| 2   | 63269604  | rs6739804  | C             | T            | -0.0130 | 0.66   | 2.08E-03 | 4.72E-10  | 7.55E-05       | 40.18   |
| 3   | 85403892  | rs28732378 | G             | A            | -0.0167 | 0.729  | 2.19E-03 | 2.24E-14  | 1.11E-04       | 58.60   |
| 3   | 85766025  | rs9835772  | T             | A            | 0.0132  | 0.235  | 2.24E-03 | 3.90E-09  | 6.27E-05       | 33.26   |
| 4   | 39413780  | rs28712821 | A             | G            | 0.0283  | 0.594  | 1.97E-03 | 1.10E-46  | 3.87E-04       | 203.61  |
| 4   | 42117559  | rs16854020 | A             | G            | 0.0181  | 0.127  | 2.91E-03 | 4.82E-10  | 7.25E-05       | 38.69   |
| 4   | 100239319 | rs1229984  | C             | T            | 0.1881  | 0.953  | 6.18E-03 | 1.00E-200 | 3.17E-03       | 1636.50 |
| 4   | 100279889 | rs78234152 | A             | G            | 0.0277  | 0.0986 | 3.07E-03 | 2.18E-19  | 1.36E-04       | 72.61   |
| 4   | 103188709 | rs13107325 | T             | C            | -0.0365 | 0.0654 | 3.91E-03 | 1.23E-20  | 1.62E-04       | 85.82   |
| 4   | 143654889 | rs331939   | A             | G            | -0.0119 | 0.339  | 2.03E-03 | 4.50E-09  | 6.35E-05       | 34.07   |
| 5   | 155902003 | rs55872084 | T             | G            | 0.0127  | 0.218  | 2.27E-03 | 1.98E-08  | 5.53E-05       | 29.27   |
| 7   | 69783020  | rs10085696 | G             | A            | -0.0161 | 0.201  | 2.49E-03 | 1.24E-10  | 8.28E-05       | 44.28   |
| 7   | 103812171 | rs2299409  | A             | G            | -0.0106 | 0.493  | 1.93E-03 | 4.80E-08  | 5.57E-05       | 29.75   |
| 8   | 126500031 | rs28601761 | G             | C            | 0.0113  | 0.405  | 1.96E-03 | 7.60E-09  | 6.15E-05       | 32.18   |
| 9   | 108755622 | rs55932213 | G             | A            | 0.0125  | 0.701  | 2.22E-03 | 1.80E-08  | 6.53E-05       | 33.67   |
| 11  | 27694241  | rs2049045  | C             | G            | -0.0138 | 0.189  | 2.51E-03 | 3.97E-08  | 5.81E-05       | 30.96   |
| 11  | 47428565  | rs4752999  | T             | C            | -0.0146 | 0.321  | 2.07E-03 | 2.03E-12  | 9.25E-05       | 48.95   |
| 11  | 113412443 | rs4309187  | C             | A            | 0.0148  | 0.697  | 2.09E-03 | 1.37E-12  | 9.24E-05       | 49.08   |
| 11  | 113655696 | rs17542254 | G             | A            | 0.0131  | 0.251  | 2.15E-03 | 8.96E-10  | 6.49E-05       | 34.67   |
| 12  | 92081800  | rs1387766  | A             | G            | -0.0108 | 0.622  | 1.98E-03 | 4.79E-08  | 5.51E-05       | 29.50   |
| 14  | 57281154  | rs962961   | T             | C            | -0.0122 | 0.329  | 2.05E-03 | 2.78E-09  | 6.56E-05       | 35.02   |
| 14  | 94844947  | rs28929474 | T             | C            | -0.0477 | 0.0154 | 7.14E-03 | 2.39E-11  | 6.89E-05       | 36.43   |

|    |          |            |   |   |         |       |          |          |          |       |
|----|----------|------------|---|---|---------|-------|----------|----------|----------|-------|
| 16 | 28526897 | rs153106   | C | T | -0.0136 | 0.409 | 1.96E-03 | 3.63E-12 | 8.96E-05 | 47.62 |
| 16 | 72338507 | rs79616692 | C | G | 0.0188  | 0.11  | 3.15E-03 | 2.38E-09 | 6.93E-05 | 36.68 |
| 16 | 73912503 | rs11860773 | C | T | -0.0150 | 0.176 | 2.44E-03 | 8.35E-10 | 6.53E-05 | 33.66 |
| 16 | 85721809 | rs13332432 | G | C | 0.0140  | 0.296 | 2.14E-03 | 5.94E-11 | 8.17E-05 | 42.26 |
| 17 | 7733833  | rs34121753 | G | A | 0.0111  | 0.532 | 1.95E-03 | 1.39E-08 | 6.10E-05 | 31.62 |
| 17 | 44189858 | rs76640332 | A | G | -0.0210 | 0.204 | 2.39E-03 | 1.47E-18 | 1.43E-04 | 73.82 |
| 19 | 49211969 | rs676388   | C | T | 0.0151  | 0.494 | 1.93E-03 | 5.49E-15 | 1.14E-04 | 60.63 |
| 20 | 25027630 | rs6106989  | A | G | 0.0109  | 0.628 | 1.98E-03 | 3.81E-08 | 5.55E-05 | 28.90 |

**Table S9. Details of SNPs used for MR analysis of alcoholic drinks per week on Seronegative RA.**

| chr | pos       | SNP        | effect_allele | other_allele | beta    | eaf    | se       | pval      | R <sup>2</sup> | F       |
|-----|-----------|------------|---------------|--------------|---------|--------|----------|-----------|----------------|---------|
| 1   | 173848808 | rs28680958 | A             | G            | -0.0136 | 0.23   | 2.37E-03 | 9.78E-09  | 6.54E-05       | 34.78   |
| 2   | 27730940  | rs1260326  | C             | T            | 0.0238  | 0.595  | 1.98E-03 | 3.33E-33  | 2.73E-04       | 145.51  |
| 2   | 44271496  | rs75120545 | T             | C            | -0.0328 | 0.022  | 5.67E-03 | 7.59E-09  | 4.63E-05       | 21.96   |
| 2   | 45141180  | rs494904   | C             | T            | 0.0151  | 0.429  | 1.96E-03 | 1.41E-14  | 1.11E-04       | 59.21   |
| 2   | 63269604  | rs6739804  | C             | T            | -0.0130 | 0.66   | 2.08E-03 | 4.72E-10  | 7.55E-05       | 40.18   |
| 3   | 85403892  | rs28732378 | G             | A            | -0.0167 | 0.729  | 2.19E-03 | 2.24E-14  | 1.11E-04       | 58.60   |
| 3   | 85766025  | rs9835772  | T             | A            | 0.0132  | 0.235  | 2.24E-03 | 3.90E-09  | 6.27E-05       | 33.26   |
| 4   | 39413780  | rs28712821 | A             | G            | 0.0283  | 0.594  | 1.97E-03 | 1.10E-46  | 3.87E-04       | 203.61  |
| 4   | 42117559  | rs16854020 | A             | G            | 0.0181  | 0.127  | 2.91E-03 | 4.82E-10  | 7.25E-05       | 38.69   |
| 4   | 100239319 | rs1229984  | C             | T            | 0.1881  | 0.953  | 6.18E-03 | 1.00E-200 | 3.17E-03       | 1636.50 |
| 4   | 100279889 | rs78234152 | A             | G            | 0.0277  | 0.0986 | 3.07E-03 | 2.18E-19  | 1.36E-04       | 72.61   |
| 4   | 103188709 | rs13107325 | T             | C            | -0.0365 | 0.0654 | 3.91E-03 | 1.23E-20  | 1.62E-04       | 85.82   |
| 4   | 143654889 | rs331939   | A             | G            | -0.0119 | 0.339  | 2.03E-03 | 4.50E-09  | 6.35E-05       | 34.07   |
| 5   | 155902003 | rs55872084 | T             | G            | 0.0127  | 0.218  | 2.27E-03 | 1.98E-08  | 5.53E-05       | 29.27   |
| 7   | 69783020  | rs10085696 | G             | A            | -0.0161 | 0.201  | 2.49E-03 | 1.24E-10  | 8.28E-05       | 44.28   |
| 7   | 103812171 | rs2299409  | A             | G            | -0.0106 | 0.493  | 1.93E-03 | 4.80E-08  | 5.57E-05       | 29.75   |

|    |           |            |   |   |         |        |          |          |          |       |
|----|-----------|------------|---|---|---------|--------|----------|----------|----------|-------|
| 8  | 126500031 | rs28601761 | G | C | 0.0113  | 0.405  | 1.96E-03 | 7.60E-09 | 6.15E-05 | 32.18 |
| 9  | 108755622 | rs55932213 | G | A | 0.0125  | 0.701  | 2.22E-03 | 1.80E-08 | 6.53E-05 | 33.67 |
| 11 | 27694241  | rs2049045  | C | G | -0.0138 | 0.189  | 2.51E-03 | 3.97E-08 | 5.81E-05 | 30.96 |
| 11 | 47428565  | rs4752999  | T | C | -0.0146 | 0.321  | 2.07E-03 | 2.03E-12 | 9.25E-05 | 48.95 |
| 11 | 113412443 | rs4309187  | C | A | 0.0148  | 0.697  | 2.09E-03 | 1.37E-12 | 9.24E-05 | 49.08 |
| 11 | 113655696 | rs17542254 | G | A | 0.0131  | 0.251  | 2.15E-03 | 8.96E-10 | 6.49E-05 | 34.67 |
| 12 | 92081800  | rs1387766  | A | G | -0.0108 | 0.622  | 1.98E-03 | 4.79E-08 | 5.51E-05 | 29.50 |
| 14 | 57281154  | rs962961   | T | C | -0.0122 | 0.329  | 2.05E-03 | 2.78E-09 | 6.56E-05 | 35.02 |
| 14 | 94844947  | rs28929474 | T | C | -0.0477 | 0.0154 | 7.14E-03 | 2.39E-11 | 6.89E-05 | 36.43 |
| 16 | 28526897  | rs153106   | C | T | -0.0136 | 0.409  | 1.96E-03 | 3.63E-12 | 8.96E-05 | 47.62 |
| 16 | 72338507  | rs79616692 | C | G | 0.0188  | 0.11   | 3.15E-03 | 2.38E-09 | 6.93E-05 | 36.68 |
| 16 | 73912503  | rs11860773 | C | T | -0.0150 | 0.176  | 2.44E-03 | 8.35E-10 | 6.53E-05 | 33.66 |
| 16 | 85721809  | rs13332432 | G | C | 0.0140  | 0.296  | 2.14E-03 | 5.94E-11 | 8.17E-05 | 42.26 |
| 17 | 7733833   | rs34121753 | G | A | 0.0111  | 0.532  | 1.95E-03 | 1.39E-08 | 6.10E-05 | 31.62 |
| 17 | 44189858  | rs76640332 | A | G | -0.0210 | 0.204  | 2.39E-03 | 1.47E-18 | 1.43E-04 | 73.82 |
| 19 | 49211969  | rs676388   | C | T | 0.0151  | 0.494  | 1.93E-03 | 5.49E-15 | 1.14E-04 | 60.63 |
| 20 | 25027630  | rs6106989  | A | G | 0.0109  | 0.628  | 1.98E-03 | 3.81E-08 | 5.55E-05 | 28.90 |

**Table S10. Details of SNPs used for MR analysis of alcoholic drinks per week on Seropositive RA.**

| chr | pos       | SNP        | effect_allele | other_allele | beta    | eaf   | se       | pval     | R <sup>2</sup> | F      |
|-----|-----------|------------|---------------|--------------|---------|-------|----------|----------|----------------|--------|
| 1   | 173848808 | rs28680958 | A             | G            | -0.0136 | 0.23  | 2.37E-03 | 9.78E-09 | 6.54E-05       | 34.78  |
| 2   | 27730940  | rs1260326  | C             | T            | 0.0238  | 0.595 | 1.98E-03 | 3.33E-33 | 2.73E-04       | 145.51 |
| 2   | 44271496  | rs75120545 | T             | C            | -0.0328 | 0.022 | 5.67E-03 | 7.59E-09 | 4.63E-05       | 21.96  |
| 2   | 45141180  | rs494904   | C             | T            | 0.0151  | 0.429 | 1.96E-03 | 1.41E-14 | 1.11E-04       | 59.21  |
| 2   | 63269604  | rs6739804  | C             | T            | -0.0130 | 0.66  | 2.08E-03 | 4.72E-10 | 7.55E-05       | 40.18  |
| 3   | 85403892  | rs28732378 | G             | A            | -0.0167 | 0.729 | 2.19E-03 | 2.24E-14 | 1.11E-04       | 58.60  |

|    |           |            |   |   |         |        |          |           |          |         |
|----|-----------|------------|---|---|---------|--------|----------|-----------|----------|---------|
| 3  | 85766025  | rs9835772  | T | A | 0.0132  | 0.235  | 2.24E-03 | 3.90E-09  | 6.27E-05 | 33.26   |
| 4  | 39413780  | rs28712821 | A | G | 0.0283  | 0.594  | 1.97E-03 | 1.10E-46  | 3.87E-04 | 203.61  |
| 4  | 42117559  | rs16854020 | A | G | 0.0181  | 0.127  | 2.91E-03 | 4.82E-10  | 7.25E-05 | 38.69   |
| 4  | 100239319 | rs1229984  | C | T | 0.1881  | 0.953  | 6.18E-03 | 1.00E-200 | 3.17E-03 | 1636.50 |
| 4  | 100279889 | rs78234152 | A | G | 0.0277  | 0.0986 | 3.07E-03 | 2.18E-19  | 1.36E-04 | 72.61   |
| 4  | 103188709 | rs13107325 | T | C | -0.0365 | 0.0654 | 3.91E-03 | 1.23E-20  | 1.62E-04 | 85.82   |
| 4  | 143654889 | rs331939   | A | G | -0.0119 | 0.339  | 2.03E-03 | 4.50E-09  | 6.35E-05 | 34.07   |
| 5  | 155902003 | rs55872084 | T | G | 0.0127  | 0.218  | 2.27E-03 | 1.98E-08  | 5.53E-05 | 29.27   |
| 7  | 69783020  | rs10085696 | G | A | -0.0161 | 0.201  | 2.49E-03 | 1.24E-10  | 8.28E-05 | 44.28   |
| 7  | 103812171 | rs2299409  | A | G | -0.0106 | 0.493  | 1.93E-03 | 4.80E-08  | 5.57E-05 | 29.75   |
| 8  | 126500031 | rs28601761 | G | C | 0.0113  | 0.405  | 1.96E-03 | 7.60E-09  | 6.15E-05 | 32.18   |
| 9  | 108755622 | rs55932213 | G | A | 0.0125  | 0.701  | 2.22E-03 | 1.80E-08  | 6.53E-05 | 33.67   |
| 11 | 27694241  | rs2049045  | C | G | -0.0138 | 0.189  | 2.51E-03 | 3.97E-08  | 5.81E-05 | 30.96   |
| 11 | 47428565  | rs4752999  | T | C | -0.0146 | 0.321  | 2.07E-03 | 2.03E-12  | 9.25E-05 | 48.95   |
| 11 | 113412443 | rs4309187  | C | A | 0.0148  | 0.697  | 2.09E-03 | 1.37E-12  | 9.24E-05 | 49.08   |
| 11 | 113655696 | rs17542254 | G | A | 0.0131  | 0.251  | 2.15E-03 | 8.96E-10  | 6.49E-05 | 34.67   |
| 12 | 92081800  | rs1387766  | A | G | -0.0108 | 0.622  | 1.98E-03 | 4.79E-08  | 5.51E-05 | 29.50   |
| 14 | 57281154  | rs962961   | T | C | -0.0122 | 0.329  | 2.05E-03 | 2.78E-09  | 6.56E-05 | 35.02   |
| 14 | 94844947  | rs28929474 | T | C | -0.0477 | 0.0154 | 7.14E-03 | 2.39E-11  | 6.89E-05 | 36.43   |
| 16 | 28526897  | rs153106   | C | T | -0.0136 | 0.409  | 1.96E-03 | 3.63E-12  | 8.96E-05 | 47.62   |
| 16 | 72338507  | rs79616692 | C | G | 0.0188  | 0.11   | 3.15E-03 | 2.38E-09  | 6.93E-05 | 36.68   |
| 16 | 73912503  | rs11860773 | C | T | -0.0150 | 0.176  | 2.44E-03 | 8.35E-10  | 6.53E-05 | 33.66   |
| 16 | 85721809  | rs13332432 | G | C | 0.0140  | 0.296  | 2.14E-03 | 5.94E-11  | 8.17E-05 | 42.26   |
| 17 | 7733833   | rs34121753 | G | A | 0.0111  | 0.532  | 1.95E-03 | 1.39E-08  | 6.10E-05 | 31.62   |
| 17 | 44189858  | rs76640332 | A | G | -0.0210 | 0.204  | 2.39E-03 | 1.47E-18  | 1.43E-04 | 73.82   |
| 19 | 49211969  | rs676388   | C | T | 0.0151  | 0.494  | 1.93E-03 | 5.49E-15  | 1.14E-04 | 60.63   |
| 20 | 25027630  | rs6106989  | A | G | 0.0109  | 0.628  | 1.98E-03 | 3.81E-08  | 5.55E-05 | 28.90   |

**Table S11. Details of SNPs used for MR analysis of alcohol intake frequency on HOA.**

| chr | pos       | SNP        | effect_allele | other_allele | beta    | eaf   | se       | pval     | R <sup>2</sup> | F      |
|-----|-----------|------------|---------------|--------------|---------|-------|----------|----------|----------------|--------|
| 1   | 940096    | rs4503294  | T             | C            | 0.0181  | 0.565 | 3.07E-03 | 3.40E-09 | 1.62E-04       | 74.85  |
| 1   | 4569436   | rs780569   | A             | T            | 0.0198  | 0.709 | 3.36E-03 | 4.00E-09 | 1.62E-04       | 74.86  |
| 1   | 35363679  | rs4417025  | A             | G            | -0.0188 | 0.361 | 3.17E-03 | 2.70E-09 | 1.64E-04       | 75.72  |
| 1   | 51218695  | rs28787109 | A             | G            | 0.0178  | 0.404 | 3.08E-03 | 7.70E-09 | 1.53E-04       | 70.65  |
| 1   | 94051350  | rs7514579  | C             | A            | 0.0197  | 0.232 | 3.60E-03 | 4.60E-08 | 1.38E-04       | 63.82  |
| 1   | 216681000 | rs2244598  | C             | T            | -0.0184 | 0.605 | 3.12E-03 | 3.80E-09 | 1.61E-04       | 74.64  |
| 2   | 2220795   | rs72769229 | T             | A            | -0.0231 | 0.155 | 4.19E-03 | 3.40E-08 | 1.40E-04       | 64.81  |
| 2   | 23887437  | rs1991083  | T             | C            | -0.0224 | 0.680 | 3.26E-03 | 6.30E-12 | 2.18E-04       | 100.93 |
| 2   | 27741237  | rs780094   | C             | T            | -0.0510 | 0.615 | 3.11E-03 | 1.30E-60 | 1.23E-03       | 569.92 |
| 2   | 45139779  | rs473098   | T             | C            | -0.0217 | 0.558 | 3.04E-03 | 9.10E-13 | 2.33E-04       | 107.83 |
| 2   | 58110969  | rs2717063  | A             | C            | -0.0204 | 0.586 | 3.08E-03 | 4.00E-11 | 2.01E-04       | 93.12  |
| 2   | 65558588  | rs6727281  | T             | C            | -0.0243 | 0.184 | 3.92E-03 | 5.50E-10 | 1.78E-04       | 82.15  |
| 2   | 74226102  | rs4241258  | T             | C            | 0.0251  | 0.138 | 4.40E-03 | 1.30E-08 | 1.49E-04       | 68.95  |
| 2   | 97797680  | rs13390019 | C             | T            | 0.0296  | 0.134 | 4.49E-03 | 4.30E-11 | 2.04E-04       | 94.13  |
| 2   | 193989223 | rs17662759 | C             | T            | 0.0301  | 0.089 | 5.46E-03 | 3.40E-08 | 1.47E-04       | 68.17  |
| 2   | 215402926 | rs10188314 | T             | C            | -0.0198 | 0.471 | 3.04E-03 | 7.20E-11 | 1.95E-04       | 90.22  |
| 3   | 38569463  | rs9829192  | T             | G            | 0.0169  | 0.435 | 3.05E-03 | 2.80E-08 | 1.41E-04       | 65.17  |
| 3   | 49029468  | rs76082653 | T             | C            | 0.0464  | 0.054 | 6.69E-03 | 3.80E-12 | 2.21E-04       | 102.42 |
| 3   | 68408109  | rs262240   | T             | C            | -0.0172 | 0.469 | 3.03E-03 | 1.40E-08 | 1.47E-04       | 68.18  |
| 3   | 71579022  | rs7610856  | A             | C            | -0.0239 | 0.429 | 3.07E-03 | 7.70E-15 | 2.79E-04       | 129.04 |
| 3   | 174213976 | rs1515591  | G             | T            | 0.0182  | 0.383 | 3.12E-03 | 4.90E-09 | 1.57E-04       | 72.65  |
| 4   | 39414993  | rs11940694 | G             | A            | -0.0437 | 0.604 | 3.12E-03 | 1.00E-44 | 9.14E-04       | 422.95 |
| 4   | 55088093  | rs28622224 | T             | C            | -0.0186 | 0.280 | 3.37E-03 | 3.20E-08 | 1.40E-04       | 64.69  |

---

|    |           |            |   |   |         |       |          |          |          |        |
|----|-----------|------------|---|---|---------|-------|----------|----------|----------|--------|
| 4  | 100290815 | rs62305780 | G | C | -0.0485 | 0.102 | 5.07E-03 | 9.90E-22 | 4.32E-04 | 199.93 |
| 4  | 135900688 | rs13102973 | C | T | -0.0194 | 0.619 | 3.12E-03 | 4.90E-10 | 1.78E-04 | 82.17  |
| 4  | 184828533 | rs62339673 | A | C | 0.0183  | 0.627 | 3.15E-03 | 6.60E-09 | 1.57E-04 | 72.41  |
| 5  | 67824690  | rs56194430 | T | C | 0.0225  | 0.169 | 4.07E-03 | 3.10E-08 | 1.43E-04 | 66.08  |
| 5  | 87854395  | rs4916723  | C | A | 0.0239  | 0.421 | 3.10E-03 | 1.10E-14 | 2.80E-04 | 129.27 |
| 5  | 144136931 | rs461599   | C | A | -0.0192 | 0.462 | 3.04E-03 | 2.70E-10 | 1.83E-04 | 84.65  |
| 5  | 145615275 | rs13178443 | T | C | -0.0187 | 0.276 | 3.39E-03 | 3.80E-08 | 1.39E-04 | 64.34  |
| 5  | 166830787 | rs11750777 | A | G | -0.0205 | 0.209 | 3.73E-03 | 3.80E-08 | 1.39E-04 | 64.31  |
| 6  | 12903957  | rs9349379  | G | A | -0.0193 | 0.405 | 3.08E-03 | 3.50E-10 | 1.80E-04 | 83.44  |
| 6  | 32074804  | rs12153855 | C | T | 0.0294  | 0.105 | 4.93E-03 | 2.40E-09 | 1.63E-04 | 75.33  |
| 6  | 141705482 | rs9403297  | A | G | 0.0188  | 0.373 | 3.13E-03 | 1.80E-09 | 1.66E-04 | 76.63  |
| 7  | 39325802  | rs9648478  | A | G | 0.0169  | 0.510 | 3.03E-03 | 2.60E-08 | 1.42E-04 | 65.70  |
| 7  | 73042085  | rs62466318 | T | C | -0.0255 | 0.203 | 3.77E-03 | 1.40E-11 | 2.10E-04 | 97.18  |
| 7  | 99872071  | rs6943160  | C | T | 0.0206  | 0.209 | 3.73E-03 | 3.10E-08 | 1.41E-04 | 64.97  |
| 7  | 141668403 | rs4726481  | T | G | 0.0218  | 0.401 | 3.10E-03 | 2.30E-12 | 2.27E-04 | 105.17 |
| 7  | 153486704 | rs2622167  | A | G | -0.0191 | 0.429 | 3.07E-03 | 4.60E-10 | 1.79E-04 | 82.77  |
| 8  | 30840651  | rs2160935  | T | C | -0.0187 | 0.604 | 3.09E-03 | 1.40E-09 | 1.68E-04 | 77.48  |
| 8  | 87214346  | rs34440851 | T | C | -0.0227 | 0.157 | 4.15E-03 | 4.60E-08 | 1.36E-04 | 63.03  |
| 8  | 141539923 | rs2977454  | G | C | -0.0259 | 0.124 | 4.60E-03 | 1.70E-08 | 1.46E-04 | 67.54  |
| 9  | 16287769  | rs74679146 | C | T | -0.0321 | 0.075 | 5.76E-03 | 2.50E-08 | 1.42E-04 | 65.61  |
| 10 | 133761285 | rs34473884 | A | G | -0.0204 | 0.248 | 3.50E-03 | 6.20E-09 | 1.55E-04 | 71.54  |
| 11 | 58394154  | rs550942   | T | C | 0.0224  | 0.824 | 3.99E-03 | 2.00E-08 | 1.46E-04 | 67.34  |
| 11 | 82688356  | rs10792669 | G | A | 0.0174  | 0.505 | 3.04E-03 | 9.90E-09 | 1.52E-04 | 70.25  |
| 11 | 121801129 | rs1666658  | C | T | 0.0180  | 0.392 | 3.10E-03 | 6.70E-09 | 1.54E-04 | 71.17  |
| 11 | 133780757 | rs11223617 | A | G | 0.0251  | 0.206 | 3.75E-03 | 2.30E-11 | 2.06E-04 | 95.29  |
| 12 | 23727301  | rs7298932  | G | A | -0.0237 | 0.148 | 4.31E-03 | 3.80E-08 | 1.42E-04 | 65.57  |
| 12 | 57511734  | rs12312693 | C | T | -0.0177 | 0.452 | 3.05E-03 | 6.80E-09 | 1.55E-04 | 71.61  |

---

|    |           |             |   |   |         |       |          |          |          |        |
|----|-----------|-------------|---|---|---------|-------|----------|----------|----------|--------|
| 12 | 123885974 | rs28768122  | C | T | 0.0207  | 0.760 | 3.55E-03 | 5.60E-09 | 1.57E-04 | 72.38  |
| 13 | 49971400  | rs7330939   | T | C | -0.0213 | 0.720 | 3.40E-03 | 3.70E-10 | 1.83E-04 | 84.77  |
| 13 | 68080817  | rs1937522   | G | A | 0.0169  | 0.528 | 3.03E-03 | 2.50E-08 | 1.42E-04 | 65.81  |
| 14 | 59072226  | rs186347    | T | G | 0.0179  | 0.463 | 3.05E-03 | 4.00E-09 | 1.60E-04 | 74.09  |
| 14 | 73523162  | rs2535911   | T | C | -0.0188 | 0.355 | 3.17E-03 | 2.70E-09 | 1.63E-04 | 75.20  |
| 15 | 34659517  | rs117799466 | C | G | -0.0197 | 0.337 | 3.32E-03 | 3.10E-09 | 1.73E-04 | 79.95  |
| 15 | 76508632  | rs80292319  | C | T | -0.0394 | 0.058 | 6.50E-03 | 1.40E-09 | 1.69E-04 | 77.96  |
| 16 | 6172126   | rs34631026  | T | C | -0.0169 | 0.446 | 3.05E-03 | 2.90E-08 | 1.41E-04 | 65.36  |
| 16 | 19982353  | rs8043563   | C | G | 0.0234  | 0.737 | 3.47E-03 | 1.70E-11 | 2.12E-04 | 97.83  |
| 16 | 51205819  | rs728538    | G | T | 0.0229  | 0.169 | 4.06E-03 | 1.80E-08 | 1.47E-04 | 67.92  |
| 16 | 72105844  | rs72787062  | A | G | -0.0282 | 0.163 | 4.10E-03 | 6.40E-12 | 2.17E-04 | 100.19 |
| 17 | 7615745   | rs9906502   | A | G | 0.0238  | 0.177 | 3.96E-03 | 1.90E-09 | 1.65E-04 | 76.24  |
| 17 | 27588806  | rs8614      | A | C | 0.0248  | 0.183 | 3.93E-03 | 2.70E-10 | 1.83E-04 | 84.74  |
| 17 | 29735752  | rs9912298   | C | A | 0.0206  | 0.240 | 3.59E-03 | 9.70E-09 | 1.54E-04 | 71.43  |
| 17 | 57780943  | rs4968391   | T | G | -0.0193 | 0.675 | 3.23E-03 | 2.30E-09 | 1.63E-04 | 75.35  |
| 18 | 21080859  | rs1893659   | A | C | -0.0293 | 0.460 | 3.05E-03 | 7.60E-22 | 4.27E-04 | 197.62 |
| 18 | 22639237  | rs5022348   | T | C | 0.0203  | 0.407 | 3.57E-03 | 1.40E-08 | 1.98E-04 | 91.66  |
| 18 | 38313195  | rs2043677   | T | C | 0.0261  | 0.146 | 4.33E-03 | 1.60E-09 | 1.70E-04 | 78.45  |
| 18 | 53125435  | rs2924321   | A | G | -0.0195 | 0.540 | 3.05E-03 | 1.60E-10 | 1.89E-04 | 87.49  |
| 19 | 49248730  | rs838145    | A | G | 0.0220  | 0.543 | 3.06E-03 | 6.70E-13 | 2.39E-04 | 110.63 |
| 20 | 35554361  | rs6030200   | A | G | -0.0195 | 0.314 | 3.27E-03 | 2.40E-09 | 1.64E-04 | 76.00  |
| 21 | 34270051  | rs11700855  | G | A | -0.0298 | 0.093 | 5.23E-03 | 1.20E-08 | 1.50E-04 | 69.56  |
| 22 | 24828853  | rs71651683  | T | C | -0.0705 | 0.014 | 1.28E-02 | 3.60E-08 | 1.39E-04 | 64.27  |

**Table S12. Details of SNPs used for MR analysis of alcohol intake frequency on KOA.**

| chr | pos | SNP | effect_allele | other_allele | beta | eaf | se | pval | R <sup>2</sup> | F |
|-----|-----|-----|---------------|--------------|------|-----|----|------|----------------|---|
|-----|-----|-----|---------------|--------------|------|-----|----|------|----------------|---|

|   |           |            |   |   |         |       |          |          |          |        |
|---|-----------|------------|---|---|---------|-------|----------|----------|----------|--------|
| 1 | 940096    | rs4503294  | T | C | 0.0181  | 0.565 | 3.07E-03 | 3.40E-09 | 1.62E-04 | 74.85  |
| 1 | 4569436   | rs780569   | A | T | 0.0198  | 0.709 | 3.36E-03 | 4.00E-09 | 1.62E-04 | 74.86  |
| 1 | 35363679  | rs4417025  | A | G | -0.0188 | 0.361 | 3.17E-03 | 2.70E-09 | 1.64E-04 | 75.72  |
| 1 | 51218695  | rs28787109 | A | G | 0.0178  | 0.404 | 3.08E-03 | 7.70E-09 | 1.53E-04 | 70.65  |
| 1 | 94051350  | rs7514579  | C | A | 0.0197  | 0.232 | 3.60E-03 | 4.60E-08 | 1.38E-04 | 63.82  |
| 1 | 216681000 | rs2244598  | C | T | -0.0184 | 0.605 | 3.12E-03 | 3.80E-09 | 1.61E-04 | 74.64  |
| 2 | 2220795   | rs72769229 | T | A | -0.0231 | 0.155 | 4.19E-03 | 3.40E-08 | 1.40E-04 | 64.81  |
| 2 | 23887437  | rs1991083  | T | C | -0.0224 | 0.680 | 3.26E-03 | 6.30E-12 | 2.18E-04 | 100.93 |
| 2 | 27741237  | rs780094   | C | T | -0.0510 | 0.615 | 3.11E-03 | 1.30E-60 | 1.23E-03 | 569.92 |
| 2 | 45139779  | rs473098   | T | C | -0.0217 | 0.558 | 3.04E-03 | 9.10E-13 | 2.33E-04 | 107.83 |
| 2 | 58110969  | rs2717063  | A | C | -0.0204 | 0.586 | 3.08E-03 | 4.00E-11 | 2.01E-04 | 93.12  |
| 2 | 65558588  | rs6727281  | T | C | -0.0243 | 0.184 | 3.92E-03 | 5.50E-10 | 1.78E-04 | 82.15  |
| 2 | 74226102  | rs4241258  | T | C | 0.0251  | 0.138 | 4.40E-03 | 1.30E-08 | 1.49E-04 | 68.95  |
| 2 | 97797680  | rs13390019 | C | T | 0.0296  | 0.134 | 4.49E-03 | 4.30E-11 | 2.04E-04 | 94.13  |
| 2 | 193989223 | rs17662759 | C | T | 0.0301  | 0.089 | 5.46E-03 | 3.40E-08 | 1.47E-04 | 68.17  |
| 2 | 215402926 | rs10188314 | T | C | -0.0198 | 0.471 | 3.04E-03 | 7.20E-11 | 1.95E-04 | 90.22  |
| 3 | 38569463  | rs9829192  | T | G | 0.0169  | 0.435 | 3.05E-03 | 2.80E-08 | 1.41E-04 | 65.17  |
| 3 | 49029468  | rs76082653 | T | C | 0.0464  | 0.054 | 6.69E-03 | 3.80E-12 | 2.21E-04 | 102.42 |
| 3 | 68408109  | rs262240   | T | C | -0.0172 | 0.469 | 3.03E-03 | 1.40E-08 | 1.47E-04 | 68.18  |
| 3 | 71579022  | rs7610856  | A | C | -0.0239 | 0.429 | 3.07E-03 | 7.70E-15 | 2.79E-04 | 129.04 |
| 3 | 174213976 | rs1515591  | G | T | 0.0182  | 0.383 | 3.12E-03 | 4.90E-09 | 1.57E-04 | 72.65  |
| 4 | 39414993  | rs11940694 | G | A | -0.0437 | 0.604 | 3.12E-03 | 1.00E-44 | 9.14E-04 | 422.95 |
| 4 | 55088093  | rs28622224 | T | C | -0.0186 | 0.280 | 3.37E-03 | 3.20E-08 | 1.40E-04 | 64.69  |
| 4 | 100290815 | rs62305780 | G | C | -0.0485 | 0.102 | 5.07E-03 | 9.90E-22 | 4.32E-04 | 199.93 |
| 4 | 135900688 | rs13102973 | C | T | -0.0194 | 0.619 | 3.12E-03 | 4.90E-10 | 1.78E-04 | 82.17  |
| 4 | 184828533 | rs62339673 | A | C | 0.0183  | 0.627 | 3.15E-03 | 6.60E-09 | 1.57E-04 | 72.41  |
| 5 | 67824690  | rs56194430 | T | C | 0.0225  | 0.169 | 4.07E-03 | 3.10E-08 | 1.43E-04 | 66.08  |



|    |           |            |   |   |         |       |          |          |          |        |
|----|-----------|------------|---|---|---------|-------|----------|----------|----------|--------|
| 5  | 87854395  | rs4916723  | C | A | 0.0239  | 0.421 | 3.10E-03 | 1.10E-14 | 2.80E-04 | 129.27 |
| 5  | 144136931 | rs461599   | C | A | -0.0192 | 0.462 | 3.04E-03 | 2.70E-10 | 1.83E-04 | 84.65  |
| 5  | 145615275 | rs13178443 | T | C | -0.0187 | 0.276 | 3.39E-03 | 3.80E-08 | 1.39E-04 | 64.34  |
| 5  | 166830787 | rs11750777 | A | G | -0.0205 | 0.209 | 3.73E-03 | 3.80E-08 | 1.39E-04 | 64.31  |
| 6  | 12903957  | rs9349379  | G | A | -0.0193 | 0.405 | 3.08E-03 | 3.50E-10 | 1.80E-04 | 83.44  |
| 6  | 32074804  | rs12153855 | C | T | 0.0294  | 0.105 | 4.93E-03 | 2.40E-09 | 1.63E-04 | 75.33  |
| 6  | 141705482 | rs9403297  | A | G | 0.0188  | 0.373 | 3.13E-03 | 1.80E-09 | 1.66E-04 | 76.63  |
| 7  | 39325802  | rs9648478  | A | G | 0.0169  | 0.510 | 3.03E-03 | 2.60E-08 | 1.42E-04 | 65.70  |
| 7  | 73042085  | rs62466318 | T | C | -0.0255 | 0.203 | 3.77E-03 | 1.40E-11 | 2.10E-04 | 97.18  |
| 7  | 99872071  | rs6943160  | C | T | 0.0206  | 0.209 | 3.73E-03 | 3.10E-08 | 1.41E-04 | 64.97  |
| 7  | 141668403 | rs4726481  | T | G | 0.0218  | 0.401 | 3.10E-03 | 2.30E-12 | 2.27E-04 | 105.17 |
| 8  | 30840651  | rs2160935  | T | C | -0.0187 | 0.604 | 3.09E-03 | 1.40E-09 | 1.68E-04 | 77.48  |
| 8  | 87214346  | rs34440851 | T | C | -0.0227 | 0.157 | 4.15E-03 | 4.60E-08 | 1.36E-04 | 63.03  |
| 8  | 141539923 | rs2977454  | G | C | -0.0259 | 0.124 | 4.60E-03 | 1.70E-08 | 1.46E-04 | 67.54  |
| 9  | 16287769  | rs74679146 | C | T | -0.0321 | 0.075 | 5.76E-03 | 2.50E-08 | 1.42E-04 | 65.61  |
| 10 | 133761285 | rs34473884 | A | G | -0.0204 | 0.248 | 3.50E-03 | 6.20E-09 | 1.55E-04 | 71.54  |
| 11 | 58394154  | rs550942   | T | C | 0.0224  | 0.824 | 3.99E-03 | 2.00E-08 | 1.46E-04 | 67.34  |
| 11 | 82688356  | rs10792669 | G | A | 0.0174  | 0.505 | 3.04E-03 | 9.90E-09 | 1.52E-04 | 70.25  |
| 11 | 121801129 | rs1666658  | C | T | 0.0180  | 0.392 | 3.10E-03 | 6.70E-09 | 1.54E-04 | 71.17  |
| 11 | 133780757 | rs11223617 | A | G | 0.0251  | 0.206 | 3.75E-03 | 2.30E-11 | 2.06E-04 | 95.29  |
| 12 | 23727301  | rs7298932  | G | A | -0.0237 | 0.148 | 4.31E-03 | 3.80E-08 | 1.42E-04 | 65.57  |
| 12 | 57511734  | rs12312693 | C | T | -0.0177 | 0.452 | 3.05E-03 | 6.80E-09 | 1.55E-04 | 71.61  |
| 13 | 49971400  | rs7330939  | T | C | -0.0213 | 0.720 | 3.40E-03 | 3.70E-10 | 1.83E-04 | 84.77  |
| 13 | 68080817  | rs1937522  | G | A | 0.0169  | 0.528 | 3.03E-03 | 2.50E-08 | 1.42E-04 | 65.81  |
| 14 | 59072226  | rs186347   | T | G | 0.0179  | 0.463 | 3.05E-03 | 4.00E-09 | 1.60E-04 | 74.09  |
| 14 | 73523162  | rs2535911  | T | C | -0.0188 | 0.355 | 3.17E-03 | 2.70E-09 | 1.63E-04 | 75.20  |

|    |          |             |   |   |         |       |          |          |          |        |
|----|----------|-------------|---|---|---------|-------|----------|----------|----------|--------|
| 15 | 34659517 | rs117799466 | C | G | -0.0197 | 0.337 | 3.32E-03 | 3.10E-09 | 1.73E-04 | 79.95  |
| 15 | 76508632 | rs80292319  | C | T | -0.0394 | 0.058 | 6.50E-03 | 1.40E-09 | 1.69E-04 | 77.96  |
| 16 | 6172126  | rs34631026  | T | C | -0.0169 | 0.446 | 3.05E-03 | 2.90E-08 | 1.41E-04 | 65.36  |
| 16 | 19982353 | rs8043563   | C | G | 0.0234  | 0.737 | 3.47E-03 | 1.70E-11 | 2.12E-04 | 97.83  |
| 16 | 51205819 | rs728538    | G | T | 0.0229  | 0.169 | 4.06E-03 | 1.80E-08 | 1.47E-04 | 67.92  |
| 16 | 72105844 | rs72787062  | A | G | -0.0282 | 0.163 | 4.10E-03 | 6.40E-12 | 2.17E-04 | 100.19 |
| 17 | 7615745  | rs9906502   | A | G | 0.0238  | 0.177 | 3.96E-03 | 1.90E-09 | 1.65E-04 | 76.24  |
| 17 | 27588806 | rs8614      | A | C | 0.0248  | 0.183 | 3.93E-03 | 2.70E-10 | 1.83E-04 | 84.74  |
| 17 | 29735752 | rs9912298   | C | A | 0.0206  | 0.240 | 3.59E-03 | 9.70E-09 | 1.54E-04 | 71.43  |
| 17 | 43925297 | rs17690703  | T | C | 0.0250  | 0.263 | 3.43E-03 | 2.90E-13 | 2.43E-04 | 112.27 |
| 17 | 57780943 | rs4968391   | T | G | -0.0193 | 0.675 | 3.23E-03 | 2.30E-09 | 1.63E-04 | 75.35  |
| 18 | 21080859 | rs1893659   | A | C | -0.0293 | 0.460 | 3.05E-03 | 7.60E-22 | 4.27E-04 | 197.62 |
| 18 | 22639237 | rs5022348   | T | C | 0.0203  | 0.407 | 3.57E-03 | 1.40E-08 | 1.98E-04 | 91.66  |
| 18 | 38313195 | rs2043677   | T | C | 0.0261  | 0.146 | 4.33E-03 | 1.60E-09 | 1.70E-04 | 78.45  |
| 18 | 53125435 | rs2924321   | A | G | -0.0195 | 0.540 | 3.05E-03 | 1.60E-10 | 1.89E-04 | 87.49  |
| 19 | 49248730 | rs838145    | A | G | 0.0220  | 0.543 | 3.06E-03 | 6.70E-13 | 2.39E-04 | 110.63 |
| 20 | 35554361 | rs6030200   | A | G | -0.0195 | 0.314 | 3.27E-03 | 2.40E-09 | 1.64E-04 | 76.00  |
| 21 | 34270051 | rs11700855  | G | A | -0.0298 | 0.093 | 5.23E-03 | 1.20E-08 | 1.50E-04 | 69.56  |
| 22 | 24828853 | rs71651683  | T | C | -0.0705 | 0.014 | 1.28E-02 | 3.60E-08 | 1.39E-04 | 64.27  |

**Table S13. Details of SNPs used for MR analysis of alcohol intake frequency on RA(M13).**

| chr | pos      | SNP        | effect_allele | other_allele | beta    | eaf   | se       | pval     | R <sup>2</sup> | F     |
|-----|----------|------------|---------------|--------------|---------|-------|----------|----------|----------------|-------|
| 1   | 940096   | rs4503294  | T             | C            | 0.0181  | 0.565 | 3.07E-03 | 3.40E-09 | 1.62E-04       | 74.85 |
| 1   | 4569436  | rs780569   | A             | T            | 0.0198  | 0.709 | 3.36E-03 | 4.00E-09 | 1.62E-04       | 74.86 |
| 1   | 35363679 | rs4417025  | A             | G            | -0.0188 | 0.361 | 3.17E-03 | 2.70E-09 | 1.64E-04       | 75.72 |
| 1   | 51218695 | rs28787109 | A             | G            | 0.0178  | 0.404 | 3.08E-03 | 7.70E-09 | 1.53E-04       | 70.65 |
| 1   | 94051350 | rs7514579  | C             | A            | 0.0197  | 0.232 | 3.60E-03 | 4.60E-08 | 1.38E-04       | 63.82 |

|   |           |            |   |   |         |       |          |           |          |         |
|---|-----------|------------|---|---|---------|-------|----------|-----------|----------|---------|
| 1 | 216681000 | rs2244598  | C | T | -0.0184 | 0.605 | 3.12E-03 | 3.80E-09  | 1.61E-04 | 74.64   |
| 2 | 2220795   | rs72769229 | T | A | -0.0231 | 0.155 | 4.19E-03 | 3.40E-08  | 1.40E-04 | 64.81   |
| 2 | 23887437  | rs1991083  | T | C | -0.0224 | 0.680 | 3.26E-03 | 6.30E-12  | 2.18E-04 | 100.93  |
| 2 | 27741237  | rs780094   | C | T | -0.0510 | 0.615 | 3.11E-03 | 1.30E-60  | 1.23E-03 | 569.92  |
| 2 | 45139779  | rs473098   | T | C | -0.0217 | 0.558 | 3.04E-03 | 9.10E-13  | 2.33E-04 | 107.83  |
| 2 | 58110969  | rs2717063  | A | C | -0.0204 | 0.586 | 3.08E-03 | 4.00E-11  | 2.01E-04 | 93.12   |
| 2 | 65558588  | rs6727281  | T | C | -0.0243 | 0.184 | 3.92E-03 | 5.50E-10  | 1.78E-04 | 82.15   |
| 2 | 74226102  | rs4241258  | T | C | 0.0251  | 0.138 | 4.40E-03 | 1.30E-08  | 1.49E-04 | 68.95   |
| 2 | 97797680  | rs13390019 | C | T | 0.0296  | 0.134 | 4.49E-03 | 4.30E-11  | 2.04E-04 | 94.13   |
| 2 | 193989223 | rs17662759 | C | T | 0.0301  | 0.089 | 5.46E-03 | 3.40E-08  | 1.47E-04 | 68.17   |
| 2 | 215402926 | rs10188314 | T | C | -0.0198 | 0.471 | 3.04E-03 | 7.20E-11  | 1.95E-04 | 90.22   |
| 3 | 38569463  | rs9829192  | T | G | 0.0169  | 0.435 | 3.05E-03 | 2.80E-08  | 1.41E-04 | 65.17   |
| 3 | 49029468  | rs76082653 | T | C | 0.0464  | 0.054 | 6.69E-03 | 3.80E-12  | 2.21E-04 | 102.42  |
| 3 | 68408109  | rs262240   | T | C | -0.0172 | 0.469 | 3.03E-03 | 1.40E-08  | 1.47E-04 | 68.18   |
| 3 | 71579022  | rs7610856  | A | C | -0.0239 | 0.429 | 3.07E-03 | 7.70E-15  | 2.79E-04 | 129.04  |
| 3 | 85407980  | rs9814516  | T | G | -0.0251 | 0.237 | 3.56E-03 | 1.60E-12  | 2.28E-04 | 105.60  |
| 3 | 131634826 | rs1228589  | A | G | 0.0211  | 0.246 | 3.53E-03 | 2.30E-09  | 1.65E-04 | 76.18   |
| 3 | 174213976 | rs1515591  | G | T | 0.0182  | 0.383 | 3.12E-03 | 4.90E-09  | 1.57E-04 | 72.65   |
| 4 | 3241845   | rs362307   | T | C | 0.0433  | 0.075 | 5.80E-03 | 8.40E-14  | 2.59E-04 | 119.72  |
| 4 | 25408838  | rs34811474 | A | G | -0.0202 | 0.231 | 3.59E-03 | 1.90E-08  | 1.45E-04 | 66.85   |
| 4 | 39414993  | rs11940694 | G | A | -0.0437 | 0.604 | 3.12E-03 | 1.00E-44  | 9.14E-04 | 422.95  |
| 4 | 55088093  | rs28622224 | T | C | -0.0186 | 0.280 | 3.37E-03 | 3.20E-08  | 1.40E-04 | 64.69   |
| 4 | 55521017  | rs2159935  | A | G | -0.0186 | 0.490 | 3.03E-03 | 8.30E-10  | 1.72E-04 | 79.74   |
| 4 | 100239319 | rs1229984  | C | T | -0.2617 | 0.973 | 9.18E-03 | 1.40E-178 | 3.63E-03 | 1683.70 |
| 4 | 100290815 | rs62305780 | G | C | -0.0485 | 0.102 | 5.07E-03 | 9.90E-22  | 4.32E-04 | 199.93  |
| 4 | 103198082 | rs13135092 | G | A | 0.0438  | 0.083 | 5.50E-03 | 1.60E-15  | 2.94E-04 | 135.98  |

|    |           |            |   |   |         |       |          |          |          |        |
|----|-----------|------------|---|---|---------|-------|----------|----------|----------|--------|
| 4  | 135900688 | rs13102973 | C | T | -0.0194 | 0.619 | 3.12E-03 | 4.90E-10 | 1.78E-04 | 82.17  |
| 4  | 184828533 | rs62339673 | A | C | 0.0183  | 0.627 | 3.15E-03 | 6.60E-09 | 1.57E-04 | 72.41  |
| 5  | 67824690  | rs56194430 | T | C | 0.0225  | 0.169 | 4.07E-03 | 3.10E-08 | 1.43E-04 | 66.08  |
| 5  | 87854395  | rs4916723  | C | A | 0.0239  | 0.421 | 3.10E-03 | 1.10E-14 | 2.80E-04 | 129.27 |
| 5  | 144136931 | rs461599   | C | A | -0.0192 | 0.462 | 3.04E-03 | 2.70E-10 | 1.83E-04 | 84.65  |
| 5  | 145615275 | rs13178443 | T | C | -0.0187 | 0.276 | 3.39E-03 | 3.80E-08 | 1.39E-04 | 64.34  |
| 5  | 166830787 | rs11750777 | A | G | -0.0205 | 0.209 | 3.73E-03 | 3.80E-08 | 1.39E-04 | 64.31  |
| 6  | 12903957  | rs9349379  | G | A | -0.0193 | 0.405 | 3.08E-03 | 3.50E-10 | 1.80E-04 | 83.44  |
| 6  | 98344031  | rs9372625  | A | G | -0.0256 | 0.382 | 3.12E-03 | 2.90E-16 | 3.08E-04 | 142.59 |
| 6  | 141705482 | rs9403297  | A | G | 0.0188  | 0.373 | 3.13E-03 | 1.80E-09 | 1.66E-04 | 76.63  |
| 7  | 1961882   | rs73050128 | A | C | -0.0260 | 0.164 | 4.09E-03 | 2.10E-10 | 1.86E-04 | 85.95  |
| 7  | 39325802  | rs9648478  | A | G | 0.0169  | 0.510 | 3.03E-03 | 2.60E-08 | 1.42E-04 | 65.70  |
| 7  | 73042085  | rs62466318 | T | C | -0.0255 | 0.203 | 3.77E-03 | 1.40E-11 | 2.10E-04 | 97.18  |
| 7  | 141668403 | rs4726481  | T | G | 0.0218  | 0.401 | 3.10E-03 | 2.30E-12 | 2.27E-04 | 105.17 |
| 7  | 153486704 | rs2622167  | A | G | -0.0191 | 0.429 | 3.07E-03 | 4.60E-10 | 1.79E-04 | 82.77  |
| 8  | 30840651  | rs2160935  | T | C | -0.0187 | 0.604 | 3.09E-03 | 1.40E-09 | 1.68E-04 | 77.48  |
| 8  | 87214346  | rs34440851 | T | C | -0.0227 | 0.157 | 4.15E-03 | 4.60E-08 | 1.36E-04 | 63.03  |
| 8  | 141539923 | rs2977454  | G | C | -0.0259 | 0.124 | 4.60E-03 | 1.70E-08 | 1.46E-04 | 67.54  |
| 8  | 142615222 | rs11787216 | T | C | 0.0244  | 0.369 | 3.20E-03 | 2.40E-14 | 2.78E-04 | 128.41 |
| 9  | 16287769  | rs74679146 | C | T | -0.0321 | 0.075 | 5.76E-03 | 2.50E-08 | 1.42E-04 | 65.61  |
| 10 | 99715744  | rs489062   | A | G | 0.0166  | 0.437 | 3.05E-03 | 4.90E-08 | 1.36E-04 | 63.09  |
| 10 | 102626510 | rs61873510 | T | G | 0.0204  | 0.328 | 3.30E-03 | 6.90E-10 | 1.83E-04 | 84.60  |
| 10 | 133761285 | rs34473884 | A | G | -0.0204 | 0.248 | 3.50E-03 | 6.20E-09 | 1.55E-04 | 71.54  |
| 10 | 133986135 | rs4242715  | A | G | -0.0187 | 0.681 | 3.25E-03 | 9.30E-09 | 1.51E-04 | 69.96  |
| 11 | 47867059  | rs11039429 | T | C | -0.0236 | 0.455 | 3.04E-03 | 8.70E-15 | 2.75E-04 | 127.29 |
| 11 | 58394154  | rs550942   | T | C | 0.0224  | 0.824 | 3.99E-03 | 2.00E-08 | 1.46E-04 | 67.34  |
| 11 | 82688356  | rs10792669 | G | A | 0.0174  | 0.505 | 3.04E-03 | 9.90E-09 | 1.52E-04 | 70.25  |

|    |           |            |   |   |         |       |          |          |          |        |
|----|-----------|------------|---|---|---------|-------|----------|----------|----------|--------|
| 11 | 121801129 | rs1666658  | C | T | 0.0180  | 0.392 | 3.10E-03 | 6.70E-09 | 1.54E-04 | 71.17  |
| 11 | 133780757 | rs11223617 | A | G | 0.0251  | 0.206 | 3.75E-03 | 2.30E-11 | 2.06E-04 | 95.29  |
| 12 | 23727301  | rs7298932  | G | A | -0.0237 | 0.148 | 4.31E-03 | 3.80E-08 | 1.42E-04 | 65.57  |
| 12 | 54623132  | rs58905411 | A | G | -0.0266 | 0.410 | 3.08E-03 | 5.10E-18 | 3.43E-04 | 158.74 |
| 12 | 56449435  | rs7302200  | A | G | -0.0184 | 0.340 | 3.20E-03 | 8.40E-09 | 1.52E-04 | 70.43  |
| 12 | 57511734  | rs12312693 | C | T | -0.0177 | 0.452 | 3.05E-03 | 6.80E-09 | 1.55E-04 | 71.61  |
| 12 | 123885974 | rs28768122 | C | T | 0.0207  | 0.760 | 3.55E-03 | 5.60E-09 | 1.57E-04 | 72.38  |
| 13 | 49971400  | rs7330939  | T | C | -0.0213 | 0.720 | 3.40E-03 | 3.70E-10 | 1.83E-04 | 84.77  |
| 13 | 68080817  | rs1937522  | G | A | 0.0169  | 0.528 | 3.03E-03 | 2.50E-08 | 1.42E-04 | 65.81  |
| 14 | 59072226  | rs186347   | T | G | 0.0179  | 0.463 | 3.05E-03 | 4.00E-09 | 1.60E-04 | 74.09  |
| 14 | 73523162  | rs2535911  | T | C | -0.0188 | 0.355 | 3.17E-03 | 2.70E-09 | 1.63E-04 | 75.20  |
| 15 | 76508632  | rs80292319 | C | T | -0.0394 | 0.058 | 6.50E-03 | 1.40E-09 | 1.69E-04 | 77.96  |
| 16 | 6172126   | rs34631026 | T | C | -0.0169 | 0.446 | 3.05E-03 | 2.90E-08 | 1.41E-04 | 65.36  |
| 16 | 19982353  | rs8043563  | C | G | 0.0234  | 0.737 | 3.47E-03 | 1.70E-11 | 2.12E-04 | 97.83  |
| 16 | 28632021  | rs2411453  | G | T | -0.0351 | 0.597 | 3.09E-03 | 7.30E-30 | 5.92E-04 | 273.85 |
| 16 | 30057148  | rs35105141 | T | C | 0.0263  | 0.402 | 3.09E-03 | 1.40E-17 | 3.34E-04 | 154.28 |
| 16 | 51205819  | rs728538   | G | T | 0.0229  | 0.169 | 4.06E-03 | 1.80E-08 | 1.47E-04 | 67.92  |
| 16 | 53800954  | rs1421085  | C | T | 0.0199  | 0.403 | 3.08E-03 | 1.00E-10 | 1.91E-04 | 88.50  |
| 16 | 72105844  | rs72787062 | A | G | -0.0282 | 0.163 | 4.10E-03 | 6.40E-12 | 2.17E-04 | 100.19 |
| 17 | 7615745   | rs9906502  | A | G | 0.0238  | 0.177 | 3.96E-03 | 1.90E-09 | 1.65E-04 | 76.24  |
| 17 | 27588806  | rs8614     | A | C | 0.0248  | 0.183 | 3.93E-03 | 2.70E-10 | 1.83E-04 | 84.74  |
| 17 | 29735752  | rs9912298  | C | A | 0.0206  | 0.240 | 3.59E-03 | 9.70E-09 | 1.54E-04 | 71.43  |
| 17 | 40721042  | rs650558   | T | C | 0.0207  | 0.248 | 3.51E-03 | 3.40E-09 | 1.60E-04 | 74.15  |
| 17 | 43925297  | rs17690703 | T | C | 0.0250  | 0.263 | 3.43E-03 | 2.90E-13 | 2.43E-04 | 112.27 |
| 17 | 57780943  | rs4968391  | T | G | -0.0193 | 0.675 | 3.23E-03 | 2.30E-09 | 1.63E-04 | 75.35  |
| 18 | 22639237  | rs5022348  | T | C | 0.0203  | 0.407 | 3.57E-03 | 1.40E-08 | 1.98E-04 | 91.66  |

|    |          |            |   |   |         |       |          |          |          |        |
|----|----------|------------|---|---|---------|-------|----------|----------|----------|--------|
| 18 | 38269812 | rs9958320  | C | T | 0.0249  | 0.153 | 4.27E-03 | 5.90E-09 | 1.60E-04 | 74.10  |
| 18 | 53125435 | rs2924321  | A | G | -0.0195 | 0.540 | 3.05E-03 | 1.60E-10 | 1.89E-04 | 87.49  |
| 19 | 49248730 | rs838145   | A | G | 0.0220  | 0.543 | 3.06E-03 | 6.70E-13 | 2.39E-04 | 110.63 |
| 20 | 35554361 | rs6030200  | A | G | -0.0195 | 0.314 | 3.27E-03 | 2.40E-09 | 1.64E-04 | 76.00  |
| 21 | 34270051 | rs11700855 | G | A | -0.0298 | 0.093 | 5.23E-03 | 1.20E-08 | 1.50E-04 | 69.56  |
| 22 | 24828853 | rs71651683 | T | C | -0.0705 | 0.014 | 1.28E-02 | 3.60E-08 | 1.39E-04 | 64.27  |

**Table S14. Details of SNPs used for MR analysis of alcohol intake frequency on Seronegative RA.**

| chr | pos       | SNP        | effect_allele | other_allele | beta    | eaf   | se       | pval     | R <sup>2</sup> | F      |
|-----|-----------|------------|---------------|--------------|---------|-------|----------|----------|----------------|--------|
| 1   | 940096    | rs4503294  | T             | C            | 0.0181  | 0.565 | 3.07E-03 | 3.40E-09 | 1.62E-04       | 74.85  |
| 1   | 4569436   | rs780569   | A             | T            | 0.0198  | 0.709 | 3.36E-03 | 4.00E-09 | 1.62E-04       | 74.86  |
| 1   | 35363679  | rs4417025  | A             | G            | -0.0188 | 0.361 | 3.17E-03 | 2.70E-09 | 1.64E-04       | 75.72  |
| 1   | 51218695  | rs28787109 | A             | G            | 0.0178  | 0.404 | 3.08E-03 | 7.70E-09 | 1.53E-04       | 70.65  |
| 1   | 94051350  | rs7514579  | C             | A            | 0.0197  | 0.232 | 3.60E-03 | 4.60E-08 | 1.38E-04       | 63.82  |
| 1   | 216681000 | rs2244598  | C             | T            | -0.0184 | 0.605 | 3.12E-03 | 3.80E-09 | 1.61E-04       | 74.64  |
| 2   | 2220795   | rs72769229 | T             | A            | -0.0231 | 0.155 | 4.19E-03 | 3.40E-08 | 1.40E-04       | 64.81  |
| 2   | 23887437  | rs1991083  | T             | C            | -0.0224 | 0.680 | 3.26E-03 | 6.30E-12 | 2.18E-04       | 100.93 |
| 2   | 27741237  | rs780094   | C             | T            | -0.0510 | 0.615 | 3.11E-03 | 1.30E-60 | 1.23E-03       | 569.92 |
| 2   | 45139779  | rs473098   | T             | C            | -0.0217 | 0.558 | 3.04E-03 | 9.10E-13 | 2.33E-04       | 107.83 |
| 2   | 58110969  | rs2717063  | A             | C            | -0.0204 | 0.586 | 3.08E-03 | 4.00E-11 | 2.01E-04       | 93.12  |
| 2   | 65558588  | rs6727281  | T             | C            | -0.0243 | 0.184 | 3.92E-03 | 5.50E-10 | 1.78E-04       | 82.15  |
| 2   | 74226102  | rs4241258  | T             | C            | 0.0251  | 0.138 | 4.40E-03 | 1.30E-08 | 1.49E-04       | 68.95  |
| 2   | 97797680  | rs13390019 | C             | T            | 0.0296  | 0.134 | 4.49E-03 | 4.30E-11 | 2.04E-04       | 94.13  |
| 2   | 193989223 | rs17662759 | C             | T            | 0.0301  | 0.089 | 5.46E-03 | 3.40E-08 | 1.47E-04       | 68.17  |
| 2   | 215402926 | rs10188314 | T             | C            | -0.0198 | 0.471 | 3.04E-03 | 7.20E-11 | 1.95E-04       | 90.22  |
| 3   | 38569463  | rs9829192  | T             | G            | 0.0169  | 0.435 | 3.05E-03 | 2.80E-08 | 1.41E-04       | 65.17  |
| 3   | 49029468  | rs76082653 | T             | C            | 0.0464  | 0.054 | 6.69E-03 | 3.80E-12 | 2.21E-04       | 102.42 |

|   |           |            |   |   |         |       |          |           |          |         |
|---|-----------|------------|---|---|---------|-------|----------|-----------|----------|---------|
| 3 | 68408109  | rs262240   | T | C | -0.0172 | 0.469 | 3.03E-03 | 1.40E-08  | 1.47E-04 | 68.18   |
| 3 | 71579022  | rs7610856  | A | C | -0.0239 | 0.429 | 3.07E-03 | 7.70E-15  | 2.79E-04 | 129.04  |
| 3 | 85407980  | rs9814516  | T | G | -0.0251 | 0.237 | 3.56E-03 | 1.60E-12  | 2.28E-04 | 105.60  |
| 3 | 131634826 | rs1228589  | A | G | 0.0211  | 0.246 | 3.53E-03 | 2.30E-09  | 1.65E-04 | 76.18   |
| 3 | 174213976 | rs1515591  | G | T | 0.0182  | 0.383 | 3.12E-03 | 4.90E-09  | 1.57E-04 | 72.65   |
| 4 | 3241845   | rs362307   | T | C | 0.0433  | 0.075 | 5.80E-03 | 8.40E-14  | 2.59E-04 | 119.72  |
| 4 | 25408838  | rs34811474 | A | G | -0.0202 | 0.231 | 3.59E-03 | 1.90E-08  | 1.45E-04 | 66.85   |
| 4 | 39414993  | rs11940694 | G | A | -0.0437 | 0.604 | 3.12E-03 | 1.00E-44  | 9.14E-04 | 422.95  |
| 4 | 55088093  | rs28622224 | T | C | -0.0186 | 0.280 | 3.37E-03 | 3.20E-08  | 1.40E-04 | 64.69   |
| 4 | 55521017  | rs2159935  | A | G | -0.0186 | 0.490 | 3.03E-03 | 8.30E-10  | 1.72E-04 | 79.74   |
| 4 | 100239319 | rs1229984  | C | T | -0.2617 | 0.973 | 9.18E-03 | 1.40E-178 | 3.63E-03 | 1683.70 |
| 4 | 100290815 | rs62305780 | G | C | -0.0485 | 0.102 | 5.07E-03 | 9.90E-22  | 4.32E-04 | 199.93  |
| 4 | 103198082 | rs13135092 | G | A | 0.0438  | 0.083 | 5.50E-03 | 1.60E-15  | 2.94E-04 | 135.98  |
| 4 | 135900688 | rs13102973 | C | T | -0.0194 | 0.619 | 3.12E-03 | 4.90E-10  | 1.78E-04 | 82.17   |
| 4 | 184828533 | rs62339673 | A | C | 0.0183  | 0.627 | 3.15E-03 | 6.60E-09  | 1.57E-04 | 72.41   |
| 5 | 67824690  | rs56194430 | T | C | 0.0225  | 0.169 | 4.07E-03 | 3.10E-08  | 1.43E-04 | 66.08   |
| 5 | 87854395  | rs4916723  | C | A | 0.0239  | 0.421 | 3.10E-03 | 1.10E-14  | 2.80E-04 | 129.27  |
| 5 | 144136931 | rs461599   | C | A | -0.0192 | 0.462 | 3.04E-03 | 2.70E-10  | 1.83E-04 | 84.65   |
| 5 | 145615275 | rs13178443 | T | C | -0.0187 | 0.276 | 3.39E-03 | 3.80E-08  | 1.39E-04 | 64.34   |
| 5 | 166830787 | rs11750777 | A | G | -0.0205 | 0.209 | 3.73E-03 | 3.80E-08  | 1.39E-04 | 64.31   |
| 6 | 12903957  | rs9349379  | G | A | -0.0193 | 0.405 | 3.08E-03 | 3.50E-10  | 1.80E-04 | 83.44   |
| 6 | 32074804  | rs12153855 | C | T | 0.0294  | 0.105 | 4.93E-03 | 2.40E-09  | 1.63E-04 | 75.33   |
| 6 | 98344031  | rs9372625  | A | G | -0.0256 | 0.382 | 3.12E-03 | 2.90E-16  | 3.08E-04 | 142.59  |
| 6 | 141705482 | rs9403297  | A | G | 0.0188  | 0.373 | 3.13E-03 | 1.80E-09  | 1.66E-04 | 76.63   |
| 7 | 1961882   | rs73050128 | A | C | -0.0260 | 0.164 | 4.09E-03 | 2.10E-10  | 1.86E-04 | 85.95   |
| 7 | 39325802  | rs9648478  | A | G | 0.0169  | 0.510 | 3.03E-03 | 2.60E-08  | 1.42E-04 | 65.70   |

|    |           |            |   |   |         |       |          |          |          |        |
|----|-----------|------------|---|---|---------|-------|----------|----------|----------|--------|
| 7  | 73042085  | rs62466318 | T | C | -0.0255 | 0.203 | 3.77E-03 | 1.40E-11 | 2.10E-04 | 97.18  |
| 7  | 141668403 | rs4726481  | T | G | 0.0218  | 0.401 | 3.10E-03 | 2.30E-12 | 2.27E-04 | 105.17 |
| 7  | 153486704 | rs2622167  | A | G | -0.0191 | 0.429 | 3.07E-03 | 4.60E-10 | 1.79E-04 | 82.77  |
| 8  | 30840651  | rs2160935  | T | C | -0.0187 | 0.604 | 3.09E-03 | 1.40E-09 | 1.68E-04 | 77.48  |
| 8  | 87214346  | rs34440851 | T | C | -0.0227 | 0.157 | 4.15E-03 | 4.60E-08 | 1.36E-04 | 63.03  |
| 8  | 141539923 | rs2977454  | G | C | -0.0259 | 0.124 | 4.60E-03 | 1.70E-08 | 1.46E-04 | 67.54  |
| 8  | 142615222 | rs11787216 | T | C | 0.0244  | 0.369 | 3.20E-03 | 2.40E-14 | 2.78E-04 | 128.41 |
| 9  | 16287769  | rs74679146 | C | T | -0.0321 | 0.075 | 5.76E-03 | 2.50E-08 | 1.42E-04 | 65.61  |
| 10 | 99715744  | rs489062   | A | G | 0.0166  | 0.437 | 3.05E-03 | 4.90E-08 | 1.36E-04 | 63.09  |
| 10 | 102626510 | rs61873510 | T | G | 0.0204  | 0.328 | 3.30E-03 | 6.90E-10 | 1.83E-04 | 84.60  |
| 10 | 133761285 | rs34473884 | A | G | -0.0204 | 0.248 | 3.50E-03 | 6.20E-09 | 1.55E-04 | 71.54  |
| 10 | 133986135 | rs4242715  | A | G | -0.0187 | 0.681 | 3.25E-03 | 9.30E-09 | 1.51E-04 | 69.96  |
| 11 | 47867059  | rs11039429 | T | C | -0.0236 | 0.455 | 3.04E-03 | 8.70E-15 | 2.75E-04 | 127.29 |
| 11 | 58394154  | rs550942   | T | C | 0.0224  | 0.824 | 3.99E-03 | 2.00E-08 | 1.46E-04 | 67.34  |
| 11 | 82688356  | rs10792669 | G | A | 0.0174  | 0.505 | 3.04E-03 | 9.90E-09 | 1.52E-04 | 70.25  |
| 11 | 121801129 | rs1666658  | C | T | 0.0180  | 0.392 | 3.10E-03 | 6.70E-09 | 1.54E-04 | 71.17  |
| 11 | 133780757 | rs11223617 | A | G | 0.0251  | 0.206 | 3.75E-03 | 2.30E-11 | 2.06E-04 | 95.29  |
| 12 | 23727301  | rs7298932  | G | A | -0.0237 | 0.148 | 4.31E-03 | 3.80E-08 | 1.42E-04 | 65.57  |
| 12 | 54623132  | rs58905411 | A | G | -0.0266 | 0.410 | 3.08E-03 | 5.10E-18 | 3.43E-04 | 158.74 |
| 12 | 56449435  | rs7302200  | A | G | -0.0184 | 0.340 | 3.20E-03 | 8.40E-09 | 1.52E-04 | 70.43  |
| 12 | 57511734  | rs12312693 | C | T | -0.0177 | 0.452 | 3.05E-03 | 6.80E-09 | 1.55E-04 | 71.61  |
| 12 | 123885974 | rs28768122 | C | T | 0.0207  | 0.760 | 3.55E-03 | 5.60E-09 | 1.57E-04 | 72.38  |
| 13 | 49971400  | rs7330939  | T | C | -0.0213 | 0.720 | 3.40E-03 | 3.70E-10 | 1.83E-04 | 84.77  |
| 13 | 68080817  | rs1937522  | G | A | 0.0169  | 0.528 | 3.03E-03 | 2.50E-08 | 1.42E-04 | 65.81  |
| 14 | 59072226  | rs186347   | T | G | 0.0179  | 0.463 | 3.05E-03 | 4.00E-09 | 1.60E-04 | 74.09  |
| 14 | 73523162  | rs2535911  | T | C | -0.0188 | 0.355 | 3.17E-03 | 2.70E-09 | 1.63E-04 | 75.20  |
| 15 | 76508632  | rs80292319 | C | T | -0.0394 | 0.058 | 6.50E-03 | 1.40E-09 | 1.69E-04 | 77.96  |



|    |          |            |   |   |         |       |          |          |          |        |
|----|----------|------------|---|---|---------|-------|----------|----------|----------|--------|
| 16 | 6172126  | rs34631026 | T | C | -0.0169 | 0.446 | 3.05E-03 | 2.90E-08 | 1.41E-04 | 65.36  |
| 16 | 19982353 | rs8043563  | C | G | 0.0234  | 0.737 | 3.47E-03 | 1.70E-11 | 2.12E-04 | 97.83  |
| 16 | 28632021 | rs2411453  | G | T | -0.0351 | 0.597 | 3.09E-03 | 7.30E-30 | 5.92E-04 | 273.85 |
| 16 | 30057148 | rs35105141 | T | C | 0.0263  | 0.402 | 3.09E-03 | 1.40E-17 | 3.34E-04 | 154.28 |
| 16 | 51205819 | rs728538   | G | T | 0.0229  | 0.169 | 4.06E-03 | 1.80E-08 | 1.47E-04 | 67.92  |
| 16 | 53800954 | rs1421085  | C | T | 0.0199  | 0.403 | 3.08E-03 | 1.00E-10 | 1.91E-04 | 88.50  |
| 16 | 72105844 | rs72787062 | A | G | -0.0282 | 0.163 | 4.10E-03 | 6.40E-12 | 2.17E-04 | 100.19 |
| 17 | 7615745  | rs9906502  | A | G | 0.0238  | 0.177 | 3.96E-03 | 1.90E-09 | 1.65E-04 | 76.24  |
| 17 | 27588806 | rs8614     | A | C | 0.0248  | 0.183 | 3.93E-03 | 2.70E-10 | 1.83E-04 | 84.74  |
| 17 | 29735752 | rs9912298  | C | A | 0.0206  | 0.240 | 3.59E-03 | 9.70E-09 | 1.54E-04 | 71.43  |
| 17 | 40721042 | rs650558   | T | C | 0.0207  | 0.248 | 3.51E-03 | 3.40E-09 | 1.60E-04 | 74.15  |
| 17 | 43925297 | rs17690703 | T | C | 0.0250  | 0.263 | 3.43E-03 | 2.90E-13 | 2.43E-04 | 112.27 |
| 17 | 57780943 | rs4968391  | T | G | -0.0193 | 0.675 | 3.23E-03 | 2.30E-09 | 1.63E-04 | 75.35  |
| 18 | 21080859 | rs1893659  | A | C | -0.0293 | 0.460 | 3.05E-03 | 7.60E-22 | 4.27E-04 | 197.62 |
| 18 | 22639237 | rs5022348  | T | C | 0.0203  | 0.407 | 3.57E-03 | 1.40E-08 | 1.98E-04 | 91.66  |
| 18 | 38269812 | rs9958320  | C | T | 0.0249  | 0.153 | 4.27E-03 | 5.90E-09 | 1.60E-04 | 74.10  |
| 18 | 53125435 | rs2924321  | A | G | -0.0195 | 0.540 | 3.05E-03 | 1.60E-10 | 1.89E-04 | 87.49  |
| 19 | 49248730 | rs838145   | A | G | 0.0220  | 0.543 | 3.06E-03 | 6.70E-13 | 2.39E-04 | 110.63 |
| 20 | 35554361 | rs6030200  | A | G | -0.0195 | 0.314 | 3.27E-03 | 2.40E-09 | 1.64E-04 | 76.00  |
| 21 | 34270051 | rs11700855 | G | A | -0.0298 | 0.093 | 5.23E-03 | 1.20E-08 | 1.50E-04 | 69.56  |
| 22 | 24828853 | rs71651683 | T | C | -0.0705 | 0.014 | 1.28E-02 | 3.60E-08 | 1.39E-04 | 64.27  |

**Table S15. Details of SNPs used for MR analysis of alcohol intake frequency on Seropositive RA.**

| chr | pos     | SNP       | effect_allele | other_allele | beta   | eaf   | se       | pval     | R <sup>2</sup> | F     |
|-----|---------|-----------|---------------|--------------|--------|-------|----------|----------|----------------|-------|
| 1   | 940096  | rs4503294 | T             | C            | 0.0181 | 0.565 | 3.07E-03 | 3.40E-09 | 1.62E-04       | 74.85 |
| 1   | 4569436 | rs780569  | A             | T            | 0.0198 | 0.709 | 3.36E-03 | 4.00E-09 | 1.62E-04       | 74.86 |

|   |           |            |   |   |         |       |          |           |          |         |
|---|-----------|------------|---|---|---------|-------|----------|-----------|----------|---------|
| 1 | 35363679  | rs4417025  | A | G | -0.0188 | 0.361 | 3.17E-03 | 2.70E-09  | 1.64E-04 | 75.72   |
| 1 | 51218695  | rs28787109 | A | G | 0.0178  | 0.404 | 3.08E-03 | 7.70E-09  | 1.53E-04 | 70.65   |
| 1 | 94051350  | rs7514579  | C | A | 0.0197  | 0.232 | 3.60E-03 | 4.60E-08  | 1.38E-04 | 63.82   |
| 1 | 216681000 | rs2244598  | C | T | -0.0184 | 0.605 | 3.12E-03 | 3.80E-09  | 1.61E-04 | 74.64   |
| 2 | 2220795   | rs72769229 | T | A | -0.0231 | 0.155 | 4.19E-03 | 3.40E-08  | 1.40E-04 | 64.81   |
| 2 | 23887437  | rs1991083  | T | C | -0.0224 | 0.680 | 3.26E-03 | 6.30E-12  | 2.18E-04 | 100.93  |
| 2 | 27741237  | rs780094   | C | T | -0.0510 | 0.615 | 3.11E-03 | 1.30E-60  | 1.23E-03 | 569.92  |
| 2 | 45139779  | rs473098   | T | C | -0.0217 | 0.558 | 3.04E-03 | 9.10E-13  | 2.33E-04 | 107.83  |
| 2 | 58110969  | rs2717063  | A | C | -0.0204 | 0.586 | 3.08E-03 | 4.00E-11  | 2.01E-04 | 93.12   |
| 2 | 65558588  | rs6727281  | T | C | -0.0243 | 0.184 | 3.92E-03 | 5.50E-10  | 1.78E-04 | 82.15   |
| 2 | 74226102  | rs4241258  | T | C | 0.0251  | 0.138 | 4.40E-03 | 1.30E-08  | 1.49E-04 | 68.95   |
| 2 | 97797680  | rs13390019 | C | T | 0.0296  | 0.134 | 4.49E-03 | 4.30E-11  | 2.04E-04 | 94.13   |
| 2 | 193989223 | rs17662759 | C | T | 0.0301  | 0.089 | 5.46E-03 | 3.40E-08  | 1.47E-04 | 68.17   |
| 2 | 215402926 | rs10188314 | T | C | -0.0198 | 0.471 | 3.04E-03 | 7.20E-11  | 1.95E-04 | 90.22   |
| 3 | 38569463  | rs9829192  | T | G | 0.0169  | 0.435 | 3.05E-03 | 2.80E-08  | 1.41E-04 | 65.17   |
| 3 | 49029468  | rs76082653 | T | C | 0.0464  | 0.054 | 6.69E-03 | 3.80E-12  | 2.21E-04 | 102.42  |
| 3 | 68408109  | rs262240   | T | C | -0.0172 | 0.469 | 3.03E-03 | 1.40E-08  | 1.47E-04 | 68.18   |
| 3 | 71579022  | rs7610856  | A | C | -0.0239 | 0.429 | 3.07E-03 | 7.70E-15  | 2.79E-04 | 129.04  |
| 3 | 85407980  | rs9814516  | T | G | -0.0251 | 0.237 | 3.56E-03 | 1.60E-12  | 2.28E-04 | 105.60  |
| 3 | 131634826 | rs1228589  | A | G | 0.0211  | 0.246 | 3.53E-03 | 2.30E-09  | 1.65E-04 | 76.18   |
| 3 | 174213976 | rs1515591  | G | T | 0.0182  | 0.383 | 3.12E-03 | 4.90E-09  | 1.57E-04 | 72.65   |
| 4 | 3241845   | rs362307   | T | C | 0.0433  | 0.075 | 5.80E-03 | 8.40E-14  | 2.59E-04 | 119.72  |
| 4 | 25408838  | rs34811474 | A | G | -0.0202 | 0.231 | 3.59E-03 | 1.90E-08  | 1.45E-04 | 66.85   |
| 4 | 39414993  | rs11940694 | G | A | -0.0437 | 0.604 | 3.12E-03 | 1.00E-44  | 9.14E-04 | 422.95  |
| 4 | 55088093  | rs28622224 | T | C | -0.0186 | 0.280 | 3.37E-03 | 3.20E-08  | 1.40E-04 | 64.69   |
| 4 | 55521017  | rs2159935  | A | G | -0.0186 | 0.490 | 3.03E-03 | 8.30E-10  | 1.72E-04 | 79.74   |
| 4 | 100239319 | rs1229984  | C | T | -0.2617 | 0.973 | 9.18E-03 | 1.40E-178 | 3.63E-03 | 1683.70 |

|    |           |            |   |   |         |       |          |          |          |        |
|----|-----------|------------|---|---|---------|-------|----------|----------|----------|--------|
| 4  | 100290815 | rs62305780 | G | C | -0.0485 | 0.102 | 5.07E-03 | 9.90E-22 | 4.32E-04 | 199.93 |
| 4  | 103198082 | rs13135092 | G | A | 0.0438  | 0.083 | 5.50E-03 | 1.60E-15 | 2.94E-04 | 135.98 |
| 4  | 135900688 | rs13102973 | C | T | -0.0194 | 0.619 | 3.12E-03 | 4.90E-10 | 1.78E-04 | 82.17  |
| 4  | 184828533 | rs62339673 | A | C | 0.0183  | 0.627 | 3.15E-03 | 6.60E-09 | 1.57E-04 | 72.41  |
| 5  | 67824690  | rs56194430 | T | C | 0.0225  | 0.169 | 4.07E-03 | 3.10E-08 | 1.43E-04 | 66.08  |
| 5  | 87854395  | rs4916723  | C | A | 0.0239  | 0.421 | 3.10E-03 | 1.10E-14 | 2.80E-04 | 129.27 |
| 5  | 144136931 | rs461599   | C | A | -0.0192 | 0.462 | 3.04E-03 | 2.70E-10 | 1.83E-04 | 84.65  |
| 5  | 145615275 | rs13178443 | T | C | -0.0187 | 0.276 | 3.39E-03 | 3.80E-08 | 1.39E-04 | 64.34  |
| 5  | 166830787 | rs11750777 | A | G | -0.0205 | 0.209 | 3.73E-03 | 3.80E-08 | 1.39E-04 | 64.31  |
| 6  | 12903957  | rs9349379  | G | A | -0.0193 | 0.405 | 3.08E-03 | 3.50E-10 | 1.80E-04 | 83.44  |
| 6  | 32074804  | rs12153855 | C | T | 0.0294  | 0.105 | 4.93E-03 | 2.40E-09 | 1.63E-04 | 75.33  |
| 6  | 98344031  | rs9372625  | A | G | -0.0256 | 0.382 | 3.12E-03 | 2.90E-16 | 3.08E-04 | 142.59 |
| 6  | 141705482 | rs9403297  | A | G | 0.0188  | 0.373 | 3.13E-03 | 1.80E-09 | 1.66E-04 | 76.63  |
| 7  | 1961882   | rs73050128 | A | C | -0.0260 | 0.164 | 4.09E-03 | 2.10E-10 | 1.86E-04 | 85.95  |
| 7  | 39325802  | rs9648478  | A | G | 0.0169  | 0.510 | 3.03E-03 | 2.60E-08 | 1.42E-04 | 65.70  |
| 7  | 73042085  | rs62466318 | T | C | -0.0255 | 0.203 | 3.77E-03 | 1.40E-11 | 2.10E-04 | 97.18  |
| 7  | 141668403 | rs4726481  | T | G | 0.0218  | 0.401 | 3.10E-03 | 2.30E-12 | 2.27E-04 | 105.17 |
| 7  | 153486704 | rs2622167  | A | G | -0.0191 | 0.429 | 3.07E-03 | 4.60E-10 | 1.79E-04 | 82.77  |
| 8  | 30840651  | rs2160935  | T | C | -0.0187 | 0.604 | 3.09E-03 | 1.40E-09 | 1.68E-04 | 77.48  |
| 8  | 87214346  | rs34440851 | T | C | -0.0227 | 0.157 | 4.15E-03 | 4.60E-08 | 1.36E-04 | 63.03  |
| 8  | 141539923 | rs2977454  | G | C | -0.0259 | 0.124 | 4.60E-03 | 1.70E-08 | 1.46E-04 | 67.54  |
| 8  | 142615222 | rs11787216 | T | C | 0.0244  | 0.369 | 3.20E-03 | 2.40E-14 | 2.78E-04 | 128.41 |
| 9  | 16287769  | rs74679146 | C | T | -0.0321 | 0.075 | 5.76E-03 | 2.50E-08 | 1.42E-04 | 65.61  |
| 10 | 99715744  | rs489062   | A | G | 0.0166  | 0.437 | 3.05E-03 | 4.90E-08 | 1.36E-04 | 63.09  |
| 10 | 102626510 | rs61873510 | T | G | 0.0204  | 0.328 | 3.30E-03 | 6.90E-10 | 1.83E-04 | 84.60  |
| 10 | 133761285 | rs34473884 | A | G | -0.0204 | 0.248 | 3.50E-03 | 6.20E-09 | 1.55E-04 | 71.54  |

---

|    |           |            |   |   |         |       |          |          |          |        |
|----|-----------|------------|---|---|---------|-------|----------|----------|----------|--------|
| 10 | 133986135 | rs4242715  | A | G | -0.0187 | 0.681 | 3.25E-03 | 9.30E-09 | 1.51E-04 | 69.96  |
| 11 | 47867059  | rs11039429 | T | C | -0.0236 | 0.455 | 3.04E-03 | 8.70E-15 | 2.75E-04 | 127.29 |
| 11 | 58394154  | rs550942   | T | C | 0.0224  | 0.824 | 3.99E-03 | 2.00E-08 | 1.46E-04 | 67.34  |
| 11 | 82688356  | rs10792669 | G | A | 0.0174  | 0.505 | 3.04E-03 | 9.90E-09 | 1.52E-04 | 70.25  |
| 11 | 121801129 | rs1666658  | C | T | 0.0180  | 0.392 | 3.10E-03 | 6.70E-09 | 1.54E-04 | 71.17  |
| 11 | 133780757 | rs11223617 | A | G | 0.0251  | 0.206 | 3.75E-03 | 2.30E-11 | 2.06E-04 | 95.29  |
| 12 | 23727301  | rs7298932  | G | A | -0.0237 | 0.148 | 4.31E-03 | 3.80E-08 | 1.42E-04 | 65.57  |
| 12 | 54623132  | rs58905411 | A | G | -0.0266 | 0.410 | 3.08E-03 | 5.10E-18 | 3.43E-04 | 158.74 |
| 12 | 56449435  | rs7302200  | A | G | -0.0184 | 0.340 | 3.20E-03 | 8.40E-09 | 1.52E-04 | 70.43  |
| 12 | 57511734  | rs12312693 | C | T | -0.0177 | 0.452 | 3.05E-03 | 6.80E-09 | 1.55E-04 | 71.61  |
| 12 | 123885974 | rs28768122 | C | T | 0.0207  | 0.760 | 3.55E-03 | 5.60E-09 | 1.57E-04 | 72.38  |
| 13 | 49971400  | rs7330939  | T | C | -0.0213 | 0.720 | 3.40E-03 | 3.70E-10 | 1.83E-04 | 84.77  |
| 13 | 68080817  | rs1937522  | G | A | 0.0169  | 0.528 | 3.03E-03 | 2.50E-08 | 1.42E-04 | 65.81  |
| 14 | 59072226  | rs186347   | T | G | 0.0179  | 0.463 | 3.05E-03 | 4.00E-09 | 1.60E-04 | 74.09  |
| 14 | 73523162  | rs2535911  | T | C | -0.0188 | 0.355 | 3.17E-03 | 2.70E-09 | 1.63E-04 | 75.20  |
| 15 | 76508632  | rs80292319 | C | T | -0.0394 | 0.058 | 6.50E-03 | 1.40E-09 | 1.69E-04 | 77.96  |
| 16 | 6172126   | rs34631026 | T | C | -0.0169 | 0.446 | 3.05E-03 | 2.90E-08 | 1.41E-04 | 65.36  |
| 16 | 19982353  | rs8043563  | C | G | 0.0234  | 0.737 | 3.47E-03 | 1.70E-11 | 2.12E-04 | 97.83  |
| 16 | 28632021  | rs2411453  | G | T | -0.0351 | 0.597 | 3.09E-03 | 7.30E-30 | 5.92E-04 | 273.85 |
| 16 | 30057148  | rs35105141 | T | C | 0.0263  | 0.402 | 3.09E-03 | 1.40E-17 | 3.34E-04 | 154.28 |
| 16 | 51205819  | rs728538   | G | T | 0.0229  | 0.169 | 4.06E-03 | 1.80E-08 | 1.47E-04 | 67.92  |
| 16 | 53800954  | rs1421085  | C | T | 0.0199  | 0.403 | 3.08E-03 | 1.00E-10 | 1.91E-04 | 88.50  |
| 16 | 72105844  | rs72787062 | A | G | -0.0282 | 0.163 | 4.10E-03 | 6.40E-12 | 2.17E-04 | 100.19 |
| 17 | 7615745   | rs9906502  | A | G | 0.0238  | 0.177 | 3.96E-03 | 1.90E-09 | 1.65E-04 | 76.24  |
| 17 | 27588806  | rs8614     | A | C | 0.0248  | 0.183 | 3.93E-03 | 2.70E-10 | 1.83E-04 | 84.74  |
| 17 | 29735752  | rs9912298  | C | A | 0.0206  | 0.240 | 3.59E-03 | 9.70E-09 | 1.54E-04 | 71.43  |
| 17 | 40721042  | rs650558   | T | C | 0.0207  | 0.248 | 3.51E-03 | 3.40E-09 | 1.60E-04 | 74.15  |

---

|    |          |            |   |   |         |       |          |          |          |        |
|----|----------|------------|---|---|---------|-------|----------|----------|----------|--------|
| 17 | 43925297 | rs17690703 | T | C | 0.0250  | 0.263 | 3.43E-03 | 2.90E-13 | 2.43E-04 | 112.27 |
| 17 | 57780943 | rs4968391  | T | G | -0.0193 | 0.675 | 3.23E-03 | 2.30E-09 | 1.63E-04 | 75.35  |
| 18 | 21080859 | rs1893659  | A | C | -0.0293 | 0.460 | 3.05E-03 | 7.60E-22 | 4.27E-04 | 197.62 |
| 18 | 22639237 | rs5022348  | T | C | 0.0203  | 0.407 | 3.57E-03 | 1.40E-08 | 1.98E-04 | 91.66  |
| 18 | 38269812 | rs9958320  | C | T | 0.0249  | 0.153 | 4.27E-03 | 5.90E-09 | 1.60E-04 | 74.10  |
| 18 | 53125435 | rs2924321  | A | G | -0.0195 | 0.540 | 3.05E-03 | 1.60E-10 | 1.89E-04 | 87.49  |
| 19 | 49248730 | rs838145   | A | G | 0.0220  | 0.543 | 3.06E-03 | 6.70E-13 | 2.39E-04 | 110.63 |
| 20 | 35554361 | rs6030200  | A | G | -0.0195 | 0.314 | 3.27E-03 | 2.40E-09 | 1.64E-04 | 76.00  |
| 21 | 34270051 | rs11700855 | G | A | -0.0298 | 0.093 | 5.23E-03 | 1.20E-08 | 1.50E-04 | 69.56  |
| 22 | 24828853 | rs71651683 | T | C | -0.0705 | 0.014 | 1.28E-02 | 3.60E-08 | 1.39E-04 | 64.27  |

**Table S16. Details of SNPs used for MR analysis of smoking initiation on HOA.**

| chr | pos       | SNP        | effect_allele | other_allele | beta    | eaf   | se       | pval     | R <sup>2</sup> | F      |
|-----|-----------|------------|---------------|--------------|---------|-------|----------|----------|----------------|--------|
| 1   | 44037685  | rs3001723  | A             | G            | 0.0335  | 0.321 | 3.90E-03 | 8.12E-18 | 4.90E-04       | 309.94 |
| 1   | 73766037  | rs7555507  | T             | C            | -0.0241 | 0.496 | 3.56E-03 | 1.14E-11 | 2.91E-04       | 184.49 |
| 1   | 87905828  | rs2050586  | C             | G            | -0.0205 | 0.355 | 3.71E-03 | 3.00E-08 | 1.93E-04       | 122.36 |
| 1   | 154205120 | rs12025237 | C             | A            | -0.0330 | 0.124 | 5.34E-03 | 6.52E-10 | 2.37E-04       | 149.74 |
| 1   | 210304319 | rs2046850  | T             | C            | -0.0248 | 0.187 | 4.48E-03 | 3.03E-08 | 1.87E-04       | 118.49 |
| 2   | 45143175  | rs578584   | T             | A            | 0.0287  | 0.605 | 3.60E-03 | 1.50E-15 | 3.93E-04       | 248.87 |
| 2   | 137542847 | rs35702515 | T             | G            | 0.0252  | 0.162 | 4.23E-03 | 2.43E-09 | 1.73E-04       | 109.51 |
| 2   | 146143090 | rs13030994 | A             | G            | 0.0361  | 0.485 | 3.56E-03 | 3.56E-24 | 6.51E-04       | 412.06 |
| 2   | 155682556 | rs1445649  | C             | T            | 0.0240  | 0.525 | 3.56E-03 | 1.68E-11 | 2.87E-04       | 181.74 |
| 2   | 162802993 | rs12474587 | T             | G            | 0.0276  | 0.404 | 3.58E-03 | 1.25E-14 | 3.68E-04       | 232.78 |
| 2   | 182034448 | rs6433897  | C             | T            | 0.0224  | 0.754 | 4.06E-03 | 3.16E-08 | 1.87E-04       | 118.32 |
| 2   | 200937901 | rs2107300  | G             | C            | -0.0272 | 0.845 | 4.93E-03 | 3.27E-08 | 1.94E-04       | 122.67 |
| 2   | 226332033 | rs4674993  | G             | A            | -0.0252 | 0.207 | 4.44E-03 | 1.32E-08 | 2.09E-04       | 132.08 |

---

|   |           |            |   |   |         |       |          |          |          |        |
|---|-----------|------------|---|---|---------|-------|----------|----------|----------|--------|
| 3 | 5724536   | rs1869243  | C | T | 0.0197  | 0.481 | 3.56E-03 | 2.97E-08 | 1.95E-04 | 123.15 |
| 3 | 75009019  | rs11712680 | C | A | -0.0270 | 0.174 | 4.58E-03 | 3.51E-09 | 2.10E-04 | 133.10 |
| 3 | 117804154 | rs1154693  | G | A | 0.0326  | 0.856 | 4.91E-03 | 3.12E-11 | 2.62E-04 | 166.06 |
| 4 | 28473524  | rs962625   | G | A | 0.0237  | 0.24  | 4.04E-03 | 4.37E-09 | 2.05E-04 | 129.89 |
| 4 | 147797214 | rs10001365 | A | G | -0.0250 | 0.405 | 3.64E-03 | 6.65E-12 | 3.01E-04 | 190.54 |
| 5 | 60374912  | rs6893752  | G | A | -0.0241 | 0.766 | 4.07E-03 | 3.25E-09 | 2.08E-04 | 131.78 |
| 5 | 87756821  | rs4352629  | T | C | -0.0275 | 0.492 | 3.57E-03 | 1.22E-14 | 3.79E-04 | 239.80 |
| 5 | 103816655 | rs12186738 | T | G | -0.0333 | 0.154 | 5.02E-03 | 3.42E-11 | 2.88E-04 | 182.50 |
| 5 | 106834363 | rs72789632 | T | C | -0.0329 | 0.12  | 5.29E-03 | 5.02E-10 | 2.28E-04 | 144.57 |
| 5 | 154839646 | rs1385108  | T | C | 0.0247  | 0.239 | 4.16E-03 | 3.00E-09 | 2.21E-04 | 140.03 |
| 5 | 166989513 | rs4044321  | G | A | -0.0278 | 0.642 | 3.71E-03 | 6.08E-14 | 3.56E-04 | 225.56 |
| 6 | 52916062  | rs222449   | T | A | -0.0253 | 0.793 | 4.43E-03 | 1.08E-08 | 2.10E-04 | 133.23 |
| 6 | 67405337  | rs10498846 | T | C | 0.0206  | 0.473 | 3.56E-03 | 6.62E-09 | 2.12E-04 | 134.04 |
| 6 | 98748008  | rs9401770  | A | G | 0.0277  | 0.273 | 3.99E-03 | 3.47E-12 | 3.05E-04 | 193.22 |
| 7 | 1708080   | rs4236259  | G | T | -0.0248 | 0.499 | 3.56E-03 | 3.35E-12 | 3.07E-04 | 194.17 |
| 7 | 1889773   | rs10260968 | A | G | -0.0203 | 0.597 | 3.61E-03 | 1.75E-08 | 1.99E-04 | 125.77 |
| 7 | 3407568   | rs2140114  | T | C | -0.0233 | 0.518 | 3.73E-03 | 4.70E-10 | 2.70E-04 | 170.99 |
| 7 | 96638267  | rs3801289  | C | A | -0.0221 | 0.351 | 3.74E-03 | 3.74E-09 | 2.22E-04 | 140.35 |
| 7 | 117523709 | rs10233018 | G | A | 0.0271  | 0.503 | 3.56E-03 | 2.75E-14 | 3.66E-04 | 231.91 |
| 7 | 133589846 | rs10279261 | A | G | -0.0214 | 0.619 | 3.66E-03 | 5.00E-09 | 2.16E-04 | 136.97 |
| 8 | 27426077  | rs1565735  | A | T | -0.0376 | 0.212 | 4.46E-03 | 3.42E-17 | 4.73E-04 | 299.33 |
| 8 | 59814666  | rs13261666 | T | G | -0.0269 | 0.522 | 3.56E-03 | 3.90E-14 | 3.61E-04 | 228.50 |
| 8 | 65073605  | rs12545053 | G | A | 0.0203  | 0.397 | 3.64E-03 | 2.43E-08 | 1.97E-04 | 124.64 |
| 8 | 91995577  | rs2631024  | G | A | -0.0230 | 0.737 | 4.03E-03 | 1.18E-08 | 2.04E-04 | 129.40 |
| 8 | 93201036  | rs1899896  | T | C | 0.0264  | 0.286 | 3.89E-03 | 1.04E-11 | 2.86E-04 | 180.83 |
| 9 | 3014254   | rs4543592  | C | T | 0.0219  | 0.468 | 3.56E-03 | 7.46E-10 | 2.40E-04 | 151.60 |
| 9 | 11070165  | rs10114490 | A | G | -0.0255 | 0.198 | 4.53E-03 | 1.81E-08 | 2.07E-04 | 130.86 |

---

|    |           |             |   |   |         |        |          |          |          |        |
|----|-----------|-------------|---|---|---------|--------|----------|----------|----------|--------|
| 9  | 86707289  | rs2378662   | A | G | 0.0209  | 0.556  | 3.57E-03 | 4.16E-09 | 2.17E-04 | 137.13 |
| 10 | 8803551   | rs10905461  | C | T | -0.0240 | 0.718  | 4.15E-03 | 7.35E-09 | 2.32E-04 | 147.09 |
| 10 | 104563808 | rs12356821  | C | G | 0.0394  | 0.14   | 5.05E-03 | 6.27E-15 | 3.73E-04 | 236.27 |
| 10 | 125680419 | rs9423279   | G | C | -0.0205 | 0.641  | 3.71E-03 | 3.21E-08 | 1.94E-04 | 122.57 |
| 11 | 7950797   | rs4523689   | G | A | -0.0206 | 0.408  | 3.64E-03 | 1.55E-08 | 2.05E-04 | 129.86 |
| 11 | 85980958  | rs7929518   | G | A | 0.0242  | 0.765  | 4.28E-03 | 1.56E-08 | 2.11E-04 | 133.69 |
| 12 | 16748721  | rs11057005  | G | A | -0.0209 | 0.43   | 3.58E-03 | 4.85E-09 | 2.15E-04 | 135.91 |
| 12 | 121389500 | rs1971318   | T | C | 0.0285  | 0.141  | 4.93E-03 | 7.06E-09 | 1.97E-04 | 124.60 |
| 13 | 38357471  | rs3904512   | A | G | -0.0212 | 0.429  | 3.58E-03 | 3.23E-09 | 2.19E-04 | 138.83 |
| 13 | 100548329 | rs7322872   | T | C | -0.0256 | 0.782  | 4.33E-03 | 3.58E-09 | 2.23E-04 | 141.11 |
| 14 | 29500130  | rs76214862  | C | A | -0.0250 | 0.202  | 4.55E-03 | 3.99E-08 | 2.01E-04 | 127.43 |
| 15 | 83922387  | rs12441907  | A | C | -0.0292 | 0.186  | 4.52E-03 | 1.06E-10 | 2.58E-04 | 163.48 |
| 16 | 717085    | rs7197072   | T | C | -0.0248 | 0.238  | 4.17E-03 | 2.77E-09 | 2.22E-04 | 140.82 |
| 16 | 17572674  | rs4781977   | C | T | -0.0239 | 0.205  | 4.36E-03 | 4.54E-08 | 1.86E-04 | 117.51 |
| 16 | 65604652  | rs4785836   | C | T | -0.0205 | 0.398  | 3.66E-03 | 2.26E-08 | 2.01E-04 | 127.09 |
| 16 | 87443734  | rs1050847   | T | C | -0.0216 | 0.505  | 3.59E-03 | 1.67E-09 | 2.34E-04 | 147.96 |
| 17 | 2072949   | rs11658881  | G | A | 0.0201  | 0.418  | 3.61E-03 | 2.43E-08 | 1.97E-04 | 124.86 |
| 17 | 7795972   | rs11078713  | G | A | -0.0202 | 0.454  | 3.61E-03 | 2.23E-08 | 2.02E-04 | 127.68 |
| 17 | 30657058  | rs7224742   | T | C | -0.0207 | 0.595  | 3.66E-03 | 1.43E-08 | 2.07E-04 | 130.83 |
| 18 | 42632652  | rs72896886  | C | G | -0.0269 | 0.144  | 4.84E-03 | 2.75E-08 | 1.78E-04 | 112.81 |
| 18 | 72535282  | rs11872397  | A | G | -0.0248 | 0.252  | 4.09E-03 | 1.43E-09 | 2.31E-04 | 146.43 |
| 19 | 4474725   | rs76608582  | A | C | -0.0496 | 0.0389 | 8.26E-03 | 1.94E-09 | 1.84E-04 | 116.23 |
| 20 | 31175258  | rs1555445   | T | A | 0.0226  | 0.337  | 3.82E-03 | 3.65E-09 | 2.27E-04 | 143.89 |
| 21 | 40555561  | rs117143374 | C | T | 0.0293  | 0.12   | 5.27E-03 | 2.76E-08 | 1.81E-04 | 114.68 |
| 22 | 28781758  | rs134529    | C | T | -0.0200 | 0.349  | 3.66E-03 | 4.85E-08 | 1.81E-04 | 114.85 |

**Table S17. Details of SNPs used for MR analysis of smoking initiation on KOA.**

| chr | pos       | SNP        | effect_allele | other_allele | beta    | eaf   | se       | pval     | R <sup>2</sup> | F      |
|-----|-----------|------------|---------------|--------------|---------|-------|----------|----------|----------------|--------|
| 1   | 44037685  | rs3001723  | A             | G            | 0.0335  | 0.321 | 3.90E-03 | 8.12E-18 | 4.90E-04       | 309.94 |
| 1   | 73766037  | rs7555507  | T             | C            | -0.0241 | 0.496 | 3.56E-03 | 1.14E-11 | 2.91E-04       | 184.49 |
| 1   | 87905828  | rs2050586  | C             | G            | -0.0205 | 0.355 | 3.71E-03 | 3.00E-08 | 1.93E-04       | 122.36 |
| 1   | 154205120 | rs12025237 | C             | A            | -0.0330 | 0.124 | 5.34E-03 | 6.52E-10 | 2.37E-04       | 149.74 |
| 1   | 210304319 | rs2046850  | T             | C            | -0.0248 | 0.187 | 4.48E-03 | 3.03E-08 | 1.87E-04       | 118.49 |
| 2   | 45143175  | rs578584   | T             | A            | 0.0287  | 0.605 | 3.60E-03 | 1.50E-15 | 3.93E-04       | 248.87 |
| 2   | 137542847 | rs35702515 | T             | G            | 0.0252  | 0.162 | 4.23E-03 | 2.43E-09 | 1.73E-04       | 109.51 |
| 2   | 146143090 | rs13030994 | A             | G            | 0.0361  | 0.485 | 3.56E-03 | 3.56E-24 | 6.51E-04       | 412.06 |
| 2   | 155682556 | rs1445649  | C             | T            | 0.0240  | 0.525 | 3.56E-03 | 1.68E-11 | 2.87E-04       | 181.74 |
| 2   | 162802993 | rs12474587 | T             | G            | 0.0276  | 0.404 | 3.58E-03 | 1.25E-14 | 3.68E-04       | 232.78 |
| 2   | 182034448 | rs6433897  | C             | T            | 0.0224  | 0.754 | 4.06E-03 | 3.16E-08 | 1.87E-04       | 118.32 |
| 2   | 200937901 | rs2107300  | G             | C            | -0.0272 | 0.845 | 4.93E-03 | 3.27E-08 | 1.94E-04       | 122.67 |
| 2   | 226332033 | rs4674993  | G             | A            | -0.0252 | 0.207 | 4.44E-03 | 1.32E-08 | 2.09E-04       | 132.08 |
| 3   | 5724536   | rs1869243  | C             | T            | 0.0197  | 0.481 | 3.56E-03 | 2.97E-08 | 1.95E-04       | 123.15 |
| 3   | 75009019  | rs11712680 | C             | A            | -0.0270 | 0.174 | 4.58E-03 | 3.51E-09 | 2.10E-04       | 133.10 |
| 3   | 117804154 | rs1154693  | G             | A            | 0.0326  | 0.856 | 4.91E-03 | 3.12E-11 | 2.62E-04       | 166.06 |
| 4   | 28473524  | rs962625   | G             | A            | 0.0237  | 0.24  | 4.04E-03 | 4.37E-09 | 2.05E-04       | 129.89 |
| 4   | 147797214 | rs10001365 | A             | G            | -0.0250 | 0.405 | 3.64E-03 | 6.65E-12 | 3.01E-04       | 190.54 |
| 5   | 60374912  | rs6893752  | G             | A            | -0.0241 | 0.766 | 4.07E-03 | 3.25E-09 | 2.08E-04       | 131.78 |
| 5   | 87756821  | rs4352629  | T             | C            | -0.0275 | 0.492 | 3.57E-03 | 1.22E-14 | 3.79E-04       | 239.80 |
| 5   | 103816655 | rs12186738 | T             | G            | -0.0333 | 0.154 | 5.02E-03 | 3.42E-11 | 2.88E-04       | 182.50 |
| 5   | 106834363 | rs72789632 | T             | C            | -0.0329 | 0.12  | 5.29E-03 | 5.02E-10 | 2.28E-04       | 144.57 |
| 5   | 154839646 | rs1385108  | T             | C            | 0.0247  | 0.239 | 4.16E-03 | 3.00E-09 | 2.21E-04       | 140.03 |
| 5   | 166989513 | rs4044321  | G             | A            | -0.0278 | 0.642 | 3.71E-03 | 6.08E-14 | 3.56E-04       | 225.56 |
| 6   | 52916062  | rs222449   | T             | A            | -0.0253 | 0.793 | 4.43E-03 | 1.08E-08 | 2.10E-04       | 133.23 |



|    |           |            |   |   |         |       |          |          |          |        |
|----|-----------|------------|---|---|---------|-------|----------|----------|----------|--------|
| 6  | 67405337  | rs10498846 | T | C | 0.0206  | 0.473 | 3.56E-03 | 6.62E-09 | 2.12E-04 | 134.04 |
| 6  | 98748008  | rs9401770  | A | G | 0.0277  | 0.273 | 3.99E-03 | 3.47E-12 | 3.05E-04 | 193.22 |
| 7  | 1708080   | rs4236259  | G | T | -0.0248 | 0.499 | 3.56E-03 | 3.35E-12 | 3.07E-04 | 194.17 |
| 7  | 3407568   | rs2140114  | T | C | -0.0233 | 0.518 | 3.73E-03 | 4.70E-10 | 2.70E-04 | 170.99 |
| 7  | 117523709 | rs10233018 | G | A | 0.0271  | 0.503 | 3.56E-03 | 2.75E-14 | 3.66E-04 | 231.91 |
| 7  | 133589846 | rs10279261 | A | G | -0.0214 | 0.619 | 3.66E-03 | 5.00E-09 | 2.16E-04 | 136.97 |
| 8  | 27426077  | rs1565735  | A | T | -0.0376 | 0.212 | 4.46E-03 | 3.42E-17 | 4.73E-04 | 299.33 |
| 8  | 59814666  | rs13261666 | T | G | -0.0269 | 0.522 | 3.56E-03 | 3.90E-14 | 3.61E-04 | 228.50 |
| 8  | 65073605  | rs12545053 | G | A | 0.0203  | 0.397 | 3.64E-03 | 2.43E-08 | 1.97E-04 | 124.64 |
| 8  | 91995577  | rs2631024  | G | A | -0.0230 | 0.737 | 4.03E-03 | 1.18E-08 | 2.04E-04 | 129.40 |
| 8  | 93201036  | rs1899896  | T | C | 0.0264  | 0.286 | 3.89E-03 | 1.04E-11 | 2.86E-04 | 180.83 |
| 9  | 3014254   | rs4543592  | C | T | 0.0219  | 0.468 | 3.56E-03 | 7.46E-10 | 2.40E-04 | 151.60 |
| 9  | 11070165  | rs10114490 | A | G | -0.0255 | 0.198 | 4.53E-03 | 1.81E-08 | 2.07E-04 | 130.86 |
| 9  | 86707289  | rs2378662  | A | G | 0.0209  | 0.556 | 3.57E-03 | 4.16E-09 | 2.17E-04 | 137.13 |
| 10 | 8803551   | rs10905461 | C | T | -0.0240 | 0.718 | 4.15E-03 | 7.35E-09 | 2.32E-04 | 147.09 |
| 10 | 104563808 | rs12356821 | C | G | 0.0394  | 0.14  | 5.05E-03 | 6.27E-15 | 3.73E-04 | 236.27 |
| 10 | 125680419 | rs9423279  | G | C | -0.0205 | 0.641 | 3.71E-03 | 3.21E-08 | 1.94E-04 | 122.57 |
| 11 | 7950797   | rs4523689  | G | A | -0.0206 | 0.408 | 3.64E-03 | 1.55E-08 | 2.05E-04 | 129.86 |
| 11 | 85980958  | rs7929518  | G | A | 0.0242  | 0.765 | 4.28E-03 | 1.56E-08 | 2.11E-04 | 133.69 |
| 12 | 16748721  | rs11057005 | G | A | -0.0209 | 0.43  | 3.58E-03 | 4.85E-09 | 2.15E-04 | 135.91 |
| 12 | 121389500 | rs1971318  | T | C | 0.0285  | 0.141 | 4.93E-03 | 7.06E-09 | 1.97E-04 | 124.60 |
| 13 | 38357471  | rs3904512  | A | G | -0.0212 | 0.429 | 3.58E-03 | 3.23E-09 | 2.19E-04 | 138.83 |
| 14 | 29500130  | rs76214862 | C | A | -0.0250 | 0.202 | 4.55E-03 | 3.99E-08 | 2.01E-04 | 127.43 |
| 15 | 83922387  | rs12441907 | A | C | -0.0292 | 0.186 | 4.52E-03 | 1.06E-10 | 2.58E-04 | 163.48 |
| 16 | 717085    | rs7197072  | T | C | -0.0248 | 0.238 | 4.17E-03 | 2.77E-09 | 2.22E-04 | 140.82 |
| 16 | 17572674  | rs4781977  | C | T | -0.0239 | 0.205 | 4.36E-03 | 4.54E-08 | 1.86E-04 | 117.51 |

|    |          |             |   |   |         |        |          |          |          |        |
|----|----------|-------------|---|---|---------|--------|----------|----------|----------|--------|
| 16 | 65604652 | rs4785836   | C | T | -0.0205 | 0.398  | 3.66E-03 | 2.26E-08 | 2.01E-04 | 127.09 |
| 16 | 87443734 | rs1050847   | T | C | -0.0216 | 0.505  | 3.59E-03 | 1.67E-09 | 2.34E-04 | 147.96 |
| 17 | 2072949  | rs11658881  | G | A | 0.0201  | 0.418  | 3.61E-03 | 2.43E-08 | 1.97E-04 | 124.86 |
| 17 | 7795972  | rs11078713  | G | A | -0.0202 | 0.454  | 3.61E-03 | 2.23E-08 | 2.02E-04 | 127.68 |
| 17 | 30657058 | rs7224742   | T | C | -0.0207 | 0.595  | 3.66E-03 | 1.43E-08 | 2.07E-04 | 130.83 |
| 18 | 42632652 | rs72896886  | C | G | -0.0269 | 0.144  | 4.84E-03 | 2.75E-08 | 1.78E-04 | 112.81 |
| 18 | 72535282 | rs11872397  | A | G | -0.0248 | 0.252  | 4.09E-03 | 1.43E-09 | 2.31E-04 | 146.43 |
| 19 | 4474725  | rs76608582  | A | C | -0.0496 | 0.0389 | 8.26E-03 | 1.94E-09 | 1.84E-04 | 116.23 |
| 20 | 31175258 | rs1555445   | T | A | 0.0226  | 0.337  | 3.82E-03 | 3.65E-09 | 2.27E-04 | 143.89 |
| 21 | 40555561 | rs117143374 | C | T | 0.0293  | 0.12   | 5.27E-03 | 2.76E-08 | 1.81E-04 | 114.68 |
| 22 | 28781758 | rs134529    | C | T | -0.0200 | 0.349  | 3.66E-03 | 4.85E-08 | 1.81E-04 | 114.85 |

**Table S18. Details of SNPs used for MR analysis of smoking initiation on RA(M13).**

| chr | pos       | SNP        | effect_allele | other_allele | beta    | eaf   | se       | pval     | R <sup>2</sup> | F      |
|-----|-----------|------------|---------------|--------------|---------|-------|----------|----------|----------------|--------|
| 1   | 8481016   | rs301805   | G             | T            | 0.0215  | 0.559 | 3.61E-03 | 2.80E-09 | 2.27E-04       | 143.82 |
| 1   | 44037685  | rs3001723  | A             | G            | 0.0335  | 0.321 | 3.90E-03 | 8.12E-18 | 4.90E-04       | 309.94 |
| 1   | 50625979  | rs6669839  | T             | C            | 0.0260  | 0.204 | 4.40E-03 | 3.36E-09 | 2.20E-04       | 139.00 |
| 1   | 73766037  | rs7555507  | T             | C            | -0.0241 | 0.496 | 3.56E-03 | 1.14E-11 | 2.91E-04       | 184.49 |
| 1   | 87905828  | rs2050586  | C             | G            | -0.0205 | 0.355 | 3.71E-03 | 3.00E-08 | 1.93E-04       | 122.36 |
| 1   | 91196176  | rs12042107 | C             | T            | -0.0223 | 0.527 | 3.57E-03 | 4.22E-10 | 2.48E-04       | 156.69 |
| 1   | 154205120 | rs12025237 | C             | A            | -0.0330 | 0.124 | 5.34E-03 | 6.52E-10 | 2.37E-04       | 149.74 |
| 1   | 210304319 | rs2046850  | T             | C            | -0.0248 | 0.187 | 4.48E-03 | 3.03E-08 | 1.87E-04       | 118.49 |
| 2   | 623976    | rs6728726  | C             | T            | 0.0354  | 0.829 | 4.73E-03 | 6.73E-14 | 3.56E-04       | 225.53 |
| 2   | 45143175  | rs578584   | T             | A            | 0.0287  | 0.605 | 3.60E-03 | 1.50E-15 | 3.93E-04       | 248.87 |
| 2   | 104088751 | rs266047   | A             | G            | -0.0305 | 0.529 | 3.74E-03 | 3.36E-16 | 4.64E-04       | 293.67 |
| 2   | 137542847 | rs35702515 | T             | G            | 0.0252  | 0.162 | 4.23E-03 | 2.43E-09 | 1.73E-04       | 109.51 |
| 2   | 146143090 | rs13030994 | A             | G            | 0.0361  | 0.485 | 3.56E-03 | 3.56E-24 | 6.51E-04       | 412.06 |

|   |           |            |   |   |         |       |          |          |          |        |
|---|-----------|------------|---|---|---------|-------|----------|----------|----------|--------|
| 2 | 155682556 | rs1445649  | C | T | 0.0240  | 0.525 | 3.56E-03 | 1.68E-11 | 2.87E-04 | 181.74 |
| 2 | 162802993 | rs12474587 | T | G | 0.0276  | 0.404 | 3.58E-03 | 1.25E-14 | 3.68E-04 | 232.78 |
| 2 | 182034448 | rs6433897  | C | T | 0.0224  | 0.754 | 4.06E-03 | 3.16E-08 | 1.87E-04 | 118.32 |
| 2 | 200937901 | rs2107300  | G | C | -0.0272 | 0.845 | 4.93E-03 | 3.27E-08 | 1.94E-04 | 122.67 |
| 2 | 226332033 | rs4674993  | G | A | -0.0252 | 0.207 | 4.44E-03 | 1.32E-08 | 2.09E-04 | 132.08 |
| 3 | 5724536   | rs1869243  | C | T | 0.0197  | 0.481 | 3.56E-03 | 2.97E-08 | 1.95E-04 | 123.15 |
| 3 | 50224225  | rs12632110 | G | A | -0.0234 | 0.647 | 3.75E-03 | 4.78E-10 | 2.50E-04 | 158.00 |
| 3 | 75009019  | rs11712680 | C | A | -0.0270 | 0.174 | 4.58E-03 | 3.51E-09 | 2.10E-04 | 133.10 |
| 3 | 85624131  | rs6788098  | T | A | -0.0313 | 0.623 | 3.69E-03 | 1.91E-17 | 4.62E-04 | 292.21 |
| 3 | 85766025  | rs9835772  | T | A | 0.0240  | 0.235 | 4.14E-03 | 6.32E-09 | 2.08E-04 | 131.60 |
| 3 | 85985324  | rs66680800 | T | G | -0.0203 | 0.397 | 3.65E-03 | 2.83E-08 | 1.97E-04 | 124.53 |
| 3 | 117804154 | rs1154693  | G | A | 0.0326  | 0.856 | 4.91E-03 | 3.12E-11 | 2.62E-04 | 166.06 |
| 4 | 28473524  | rs962625   | G | A | 0.0237  | 0.24  | 4.04E-03 | 4.37E-09 | 2.05E-04 | 129.89 |
| 4 | 67825894  | rs993700   | C | T | -0.0259 | 0.766 | 4.29E-03 | 1.53E-09 | 2.41E-04 | 152.54 |
| 4 | 140927812 | rs13145728 | C | G | -0.0233 | 0.358 | 3.66E-03 | 2.14E-10 | 2.49E-04 | 157.29 |
| 4 | 147797214 | rs10001365 | A | G | -0.0250 | 0.405 | 3.64E-03 | 6.65E-12 | 3.01E-04 | 190.54 |
| 5 | 60374912  | rs6893752  | G | A | -0.0241 | 0.766 | 4.07E-03 | 3.25E-09 | 2.08E-04 | 131.78 |
| 5 | 87756821  | rs4352629  | T | C | -0.0275 | 0.492 | 3.57E-03 | 1.22E-14 | 3.79E-04 | 239.80 |
| 5 | 103816655 | rs12186738 | T | G | -0.0333 | 0.154 | 5.02E-03 | 3.42E-11 | 2.88E-04 | 182.50 |
| 5 | 106834363 | rs72789632 | T | C | -0.0329 | 0.12  | 5.29E-03 | 5.02E-10 | 2.28E-04 | 144.57 |
| 5 | 154839646 | rs1385108  | T | C | 0.0247  | 0.239 | 4.16E-03 | 3.00E-09 | 2.21E-04 | 140.03 |
| 5 | 166989513 | rs4044321  | G | A | -0.0278 | 0.642 | 3.71E-03 | 6.08E-14 | 3.56E-04 | 225.56 |
| 6 | 52916062  | rs222449   | T | A | -0.0253 | 0.793 | 4.43E-03 | 1.08E-08 | 2.10E-04 | 133.23 |
| 6 | 67405337  | rs10498846 | T | C | 0.0206  | 0.473 | 3.56E-03 | 6.62E-09 | 2.12E-04 | 134.04 |
| 6 | 98748008  | rs9401770  | A | G | 0.0277  | 0.273 | 3.99E-03 | 3.47E-12 | 3.05E-04 | 193.22 |
| 6 | 108994161 | rs3800227  | G | A | 0.0228  | 0.701 | 4.06E-03 | 1.93E-08 | 2.18E-04 | 138.07 |

---

|    |           |            |   |   |         |       |          |          |          |        |
|----|-----------|------------|---|---|---------|-------|----------|----------|----------|--------|
| 6  | 111644332 | rs240963   | C | T | -0.0410 | 0.836 | 4.84E-03 | 2.16E-17 | 4.62E-04 | 292.45 |
| 7  | 1708080   | rs4236259  | G | T | -0.0248 | 0.499 | 3.56E-03 | 3.35E-12 | 3.07E-04 | 194.17 |
| 7  | 1889773   | rs10260968 | A | G | -0.0203 | 0.597 | 3.61E-03 | 1.75E-08 | 1.99E-04 | 125.77 |
| 7  | 3407568   | rs2140114  | T | C | -0.0233 | 0.518 | 3.73E-03 | 4.70E-10 | 2.70E-04 | 170.99 |
| 7  | 69735251  | rs12112638 | G | A | -0.0245 | 0.275 | 4.04E-03 | 1.34E-09 | 2.40E-04 | 151.82 |
| 7  | 96638267  | rs3801289  | C | A | -0.0221 | 0.351 | 3.74E-03 | 3.74E-09 | 2.22E-04 | 140.35 |
| 7  | 99185406  | rs12333760 | C | T | -0.0290 | 0.204 | 4.80E-03 | 1.44E-09 | 2.74E-04 | 173.44 |
| 7  | 117523709 | rs10233018 | G | A | 0.0271  | 0.503 | 3.56E-03 | 2.75E-14 | 3.66E-04 | 231.91 |
| 7  | 133589846 | rs10279261 | A | G | -0.0214 | 0.619 | 3.66E-03 | 5.00E-09 | 2.16E-04 | 136.97 |
| 8  | 27426077  | rs1565735  | A | T | -0.0376 | 0.212 | 4.46E-03 | 3.42E-17 | 4.73E-04 | 299.33 |
| 8  | 59814666  | rs13261666 | T | G | -0.0269 | 0.522 | 3.56E-03 | 3.90E-14 | 3.61E-04 | 228.50 |
| 8  | 65073605  | rs12545053 | G | A | 0.0203  | 0.397 | 3.64E-03 | 2.43E-08 | 1.97E-04 | 124.64 |
| 8  | 91995577  | rs2631024  | G | A | -0.0230 | 0.737 | 4.03E-03 | 1.18E-08 | 2.04E-04 | 129.40 |
| 8  | 93201036  | rs1899896  | T | C | 0.0264  | 0.286 | 3.89E-03 | 1.04E-11 | 2.86E-04 | 180.83 |
| 9  | 3014254   | rs4543592  | C | T | 0.0219  | 0.468 | 3.56E-03 | 7.46E-10 | 2.40E-04 | 151.60 |
| 9  | 86707289  | rs2378662  | A | G | 0.0209  | 0.556 | 3.57E-03 | 4.16E-09 | 2.17E-04 | 137.13 |
| 10 | 8803551   | rs10905461 | C | T | -0.0240 | 0.718 | 4.15E-03 | 7.35E-09 | 2.32E-04 | 147.09 |
| 10 | 21766969  | rs10159545 | G | C | 0.0263  | 0.375 | 3.73E-03 | 1.84E-12 | 3.23E-04 | 204.46 |
| 10 | 104563808 | rs12356821 | C | G | 0.0394  | 0.14  | 5.05E-03 | 6.27E-15 | 3.73E-04 | 236.27 |
| 10 | 125680419 | rs9423279  | G | C | -0.0205 | 0.641 | 3.71E-03 | 3.21E-08 | 1.94E-04 | 122.57 |
| 11 | 7950797   | rs4523689  | G | A | -0.0206 | 0.408 | 3.64E-03 | 1.55E-08 | 2.05E-04 | 129.86 |
| 11 | 27679916  | rs6265     | T | C | -0.0318 | 0.203 | 4.58E-03 | 3.77E-12 | 3.27E-04 | 206.95 |
| 11 | 85980958  | rs7929518  | G | A | 0.0242  | 0.765 | 4.28E-03 | 1.56E-08 | 2.11E-04 | 133.69 |
| 11 | 112911004 | rs7938812  | G | T | 0.0438  | 0.424 | 3.64E-03 | 2.71E-33 | 9.37E-04 | 593.29 |
| 12 | 16748721  | rs11057005 | G | A | -0.0209 | 0.43  | 3.58E-03 | 4.85E-09 | 2.15E-04 | 135.91 |
| 12 | 56508409  | rs4759228  | C | G | -0.0217 | 0.27  | 3.93E-03 | 3.58E-08 | 1.85E-04 | 117.39 |
| 12 | 69655167  | rs7969559  | G | A | -0.0244 | 0.688 | 3.96E-03 | 7.31E-10 | 2.55E-04 | 161.46 |

---

|    |           |             |   |   |         |        |          |          |          |        |
|----|-----------|-------------|---|---|---------|--------|----------|----------|----------|--------|
| 12 | 121389500 | rs1971318   | T | C | 0.0285  | 0.141  | 4.93E-03 | 7.06E-09 | 1.97E-04 | 124.60 |
| 13 | 38357471  | rs3904512   | A | G | -0.0212 | 0.429  | 3.58E-03 | 3.23E-09 | 2.19E-04 | 138.83 |
| 14 | 29500130  | rs76214862  | C | A | -0.0250 | 0.202  | 4.55E-03 | 3.99E-08 | 2.01E-04 | 127.43 |
| 15 | 47935843  | rs1435741   | A | G | 0.0294  | 0.425  | 3.59E-03 | 2.64E-16 | 4.23E-04 | 267.72 |
| 15 | 83922387  | rs12441907  | A | C | -0.0292 | 0.186  | 4.52E-03 | 1.06E-10 | 2.58E-04 | 163.48 |
| 16 | 717085    | rs7197072   | T | C | -0.0248 | 0.238  | 4.17E-03 | 2.77E-09 | 2.22E-04 | 140.82 |
| 16 | 17572674  | rs4781977   | C | T | -0.0239 | 0.205  | 4.36E-03 | 4.54E-08 | 1.86E-04 | 117.51 |
| 16 | 65604652  | rs4785836   | C | T | -0.0205 | 0.398  | 3.66E-03 | 2.26E-08 | 2.01E-04 | 127.09 |
| 16 | 87443734  | rs1050847   | T | C | -0.0216 | 0.505  | 3.59E-03 | 1.67E-09 | 2.34E-04 | 147.96 |
| 17 | 2072949   | rs11658881  | G | A | 0.0201  | 0.418  | 3.61E-03 | 2.43E-08 | 1.97E-04 | 124.86 |
| 17 | 7795972   | rs11078713  | G | A | -0.0202 | 0.454  | 3.61E-03 | 2.23E-08 | 2.02E-04 | 127.68 |
| 17 | 30657058  | rs7224742   | T | C | -0.0207 | 0.595  | 3.66E-03 | 1.43E-08 | 2.07E-04 | 130.83 |
| 18 | 42632652  | rs72896886  | C | G | -0.0269 | 0.144  | 4.84E-03 | 2.75E-08 | 1.78E-04 | 112.81 |
| 18 | 72535282  | rs11872397  | A | G | -0.0248 | 0.252  | 4.09E-03 | 1.43E-09 | 2.31E-04 | 146.43 |
| 19 | 4474725   | rs76608582  | A | C | -0.0496 | 0.0389 | 8.26E-03 | 1.94E-09 | 1.84E-04 | 116.23 |
| 21 | 40555561  | rs117143374 | C | T | 0.0293  | 0.12   | 5.27E-03 | 2.76E-08 | 1.81E-04 | 114.68 |
| 22 | 28781758  | rs134529    | C | T | -0.0200 | 0.349  | 3.66E-03 | 4.85E-08 | 1.81E-04 | 114.85 |

**Table S19. Details of SNPs used for MR analysis of smoking initiation on Seronegative RA.**

| chr | pos      | SNP        | effect_allele | other_allele | beta    | eaf   | se       | pval     | R <sup>2</sup> | F      |
|-----|----------|------------|---------------|--------------|---------|-------|----------|----------|----------------|--------|
| 1   | 8481016  | rs301805   | G             | T            | 0.0215  | 0.559 | 3.61E-03 | 2.80E-09 | 2.27E-04       | 143.82 |
| 1   | 44037685 | rs3001723  | A             | G            | 0.0335  | 0.321 | 3.90E-03 | 8.12E-18 | 4.90E-04       | 309.94 |
| 1   | 50625979 | rs6669839  | T             | C            | 0.0260  | 0.204 | 4.40E-03 | 3.36E-09 | 2.20E-04       | 139.00 |
| 1   | 73766037 | rs7555507  | T             | C            | -0.0241 | 0.496 | 3.56E-03 | 1.14E-11 | 2.91E-04       | 184.49 |
| 1   | 87905828 | rs2050586  | C             | G            | -0.0205 | 0.355 | 3.71E-03 | 3.00E-08 | 1.93E-04       | 122.36 |
| 1   | 91196176 | rs12042107 | C             | T            | -0.0223 | 0.527 | 3.57E-03 | 4.22E-10 | 2.48E-04       | 156.69 |

---

|   |           |            |   |   |         |       |          |          |          |        |
|---|-----------|------------|---|---|---------|-------|----------|----------|----------|--------|
| 1 | 154205120 | rs12025237 | C | A | -0.0330 | 0.124 | 5.34E-03 | 6.52E-10 | 2.37E-04 | 149.74 |
| 1 | 210304319 | rs2046850  | T | C | -0.0248 | 0.187 | 4.48E-03 | 3.03E-08 | 1.87E-04 | 118.49 |
| 2 | 623976    | rs6728726  | C | T | 0.0354  | 0.829 | 4.73E-03 | 6.73E-14 | 3.56E-04 | 225.53 |
| 2 | 45143175  | rs578584   | T | A | 0.0287  | 0.605 | 3.60E-03 | 1.50E-15 | 3.93E-04 | 248.87 |
| 2 | 104088751 | rs266047   | A | G | -0.0305 | 0.529 | 3.74E-03 | 3.36E-16 | 4.64E-04 | 293.67 |
| 2 | 137542847 | rs35702515 | T | G | 0.0252  | 0.162 | 4.23E-03 | 2.43E-09 | 1.73E-04 | 109.51 |
| 2 | 146143090 | rs13030994 | A | G | 0.0361  | 0.485 | 3.56E-03 | 3.56E-24 | 6.51E-04 | 412.06 |
| 2 | 155682556 | rs1445649  | C | T | 0.0240  | 0.525 | 3.56E-03 | 1.68E-11 | 2.87E-04 | 181.74 |
| 2 | 162802993 | rs12474587 | T | G | 0.0276  | 0.404 | 3.58E-03 | 1.25E-14 | 3.68E-04 | 232.78 |
| 2 | 182034448 | rs6433897  | C | T | 0.0224  | 0.754 | 4.06E-03 | 3.16E-08 | 1.87E-04 | 118.32 |
| 2 | 200937901 | rs2107300  | G | C | -0.0272 | 0.845 | 4.93E-03 | 3.27E-08 | 1.94E-04 | 122.67 |
| 2 | 226332033 | rs4674993  | G | A | -0.0252 | 0.207 | 4.44E-03 | 1.32E-08 | 2.09E-04 | 132.08 |
| 3 | 5724536   | rs1869243  | C | T | 0.0197  | 0.481 | 3.56E-03 | 2.97E-08 | 1.95E-04 | 123.15 |
| 3 | 50224225  | rs12632110 | G | A | -0.0234 | 0.647 | 3.75E-03 | 4.78E-10 | 2.50E-04 | 158.00 |
| 3 | 75009019  | rs11712680 | C | A | -0.0270 | 0.174 | 4.58E-03 | 3.51E-09 | 2.10E-04 | 133.10 |
| 3 | 85624131  | rs6788098  | T | A | -0.0313 | 0.623 | 3.69E-03 | 1.91E-17 | 4.62E-04 | 292.21 |
| 3 | 85766025  | rs9835772  | T | A | 0.0240  | 0.235 | 4.14E-03 | 6.32E-09 | 2.08E-04 | 131.60 |
| 3 | 85985324  | rs66680800 | T | G | -0.0203 | 0.397 | 3.65E-03 | 2.83E-08 | 1.97E-04 | 124.53 |
| 3 | 117804154 | rs1154693  | G | A | 0.0326  | 0.856 | 4.91E-03 | 3.12E-11 | 2.62E-04 | 166.06 |
| 4 | 28473524  | rs962625   | G | A | 0.0237  | 0.24  | 4.04E-03 | 4.37E-09 | 2.05E-04 | 129.89 |
| 4 | 67825894  | rs993700   | C | T | -0.0259 | 0.766 | 4.29E-03 | 1.53E-09 | 2.41E-04 | 152.54 |
| 4 | 140927812 | rs13145728 | C | G | -0.0233 | 0.358 | 3.66E-03 | 2.14E-10 | 2.49E-04 | 157.29 |
| 4 | 147797214 | rs10001365 | A | G | -0.0250 | 0.405 | 3.64E-03 | 6.65E-12 | 3.01E-04 | 190.54 |
| 5 | 60374912  | rs6893752  | G | A | -0.0241 | 0.766 | 4.07E-03 | 3.25E-09 | 2.08E-04 | 131.78 |
| 5 | 87756821  | rs4352629  | T | C | -0.0275 | 0.492 | 3.57E-03 | 1.22E-14 | 3.79E-04 | 239.80 |
| 5 | 103816655 | rs12186738 | T | G | -0.0333 | 0.154 | 5.02E-03 | 3.42E-11 | 2.88E-04 | 182.50 |
| 5 | 106834363 | rs72789632 | T | C | -0.0329 | 0.12  | 5.29E-03 | 5.02E-10 | 2.28E-04 | 144.57 |

---

|    |           |            |   |   |         |       |          |          |          |        |
|----|-----------|------------|---|---|---------|-------|----------|----------|----------|--------|
| 5  | 154839646 | rs1385108  | T | C | 0.0247  | 0.239 | 4.16E-03 | 3.00E-09 | 2.21E-04 | 140.03 |
| 5  | 166989513 | rs4044321  | G | A | -0.0278 | 0.642 | 3.71E-03 | 6.08E-14 | 3.56E-04 | 225.56 |
| 6  | 52916062  | rs222449   | T | A | -0.0253 | 0.793 | 4.43E-03 | 1.08E-08 | 2.10E-04 | 133.23 |
| 6  | 67405337  | rs10498846 | T | C | 0.0206  | 0.473 | 3.56E-03 | 6.62E-09 | 2.12E-04 | 134.04 |
| 6  | 98748008  | rs9401770  | A | G | 0.0277  | 0.273 | 3.99E-03 | 3.47E-12 | 3.05E-04 | 193.22 |
| 6  | 108994161 | rs3800227  | G | A | 0.0228  | 0.701 | 4.06E-03 | 1.93E-08 | 2.18E-04 | 138.07 |
| 6  | 111644332 | rs240963   | C | T | -0.0410 | 0.836 | 4.84E-03 | 2.16E-17 | 4.62E-04 | 292.45 |
| 7  | 1708080   | rs4236259  | G | T | -0.0248 | 0.499 | 3.56E-03 | 3.35E-12 | 3.07E-04 | 194.17 |
| 7  | 1889773   | rs10260968 | A | G | -0.0203 | 0.597 | 3.61E-03 | 1.75E-08 | 1.99E-04 | 125.77 |
| 7  | 3407568   | rs2140114  | T | C | -0.0233 | 0.518 | 3.73E-03 | 4.70E-10 | 2.70E-04 | 170.99 |
| 7  | 69735251  | rs12112638 | G | A | -0.0245 | 0.275 | 4.04E-03 | 1.34E-09 | 2.40E-04 | 151.82 |
| 7  | 96638267  | rs3801289  | C | A | -0.0221 | 0.351 | 3.74E-03 | 3.74E-09 | 2.22E-04 | 140.35 |
| 7  | 99185406  | rs12333760 | C | T | -0.0290 | 0.204 | 4.80E-03 | 1.44E-09 | 2.74E-04 | 173.44 |
| 7  | 117523709 | rs10233018 | G | A | 0.0271  | 0.503 | 3.56E-03 | 2.75E-14 | 3.66E-04 | 231.91 |
| 7  | 133589846 | rs10279261 | A | G | -0.0214 | 0.619 | 3.66E-03 | 5.00E-09 | 2.16E-04 | 136.97 |
| 8  | 27426077  | rs1565735  | A | T | -0.0376 | 0.212 | 4.46E-03 | 3.42E-17 | 4.73E-04 | 299.33 |
| 8  | 59814666  | rs13261666 | T | G | -0.0269 | 0.522 | 3.56E-03 | 3.90E-14 | 3.61E-04 | 228.50 |
| 8  | 65073605  | rs12545053 | G | A | 0.0203  | 0.397 | 3.64E-03 | 2.43E-08 | 1.97E-04 | 124.64 |
| 8  | 91995577  | rs2631024  | G | A | -0.0230 | 0.737 | 4.03E-03 | 1.18E-08 | 2.04E-04 | 129.40 |
| 8  | 93201036  | rs1899896  | T | C | 0.0264  | 0.286 | 3.89E-03 | 1.04E-11 | 2.86E-04 | 180.83 |
| 9  | 3014254   | rs4543592  | C | T | 0.0219  | 0.468 | 3.56E-03 | 7.46E-10 | 2.40E-04 | 151.60 |
| 9  | 86707289  | rs2378662  | A | G | 0.0209  | 0.556 | 3.57E-03 | 4.16E-09 | 2.17E-04 | 137.13 |
| 10 | 8803551   | rs10905461 | C | T | -0.0240 | 0.718 | 4.15E-03 | 7.35E-09 | 2.32E-04 | 147.09 |
| 10 | 21766969  | rs10159545 | G | C | 0.0263  | 0.375 | 3.73E-03 | 1.84E-12 | 3.23E-04 | 204.46 |
| 10 | 104563808 | rs12356821 | C | G | 0.0394  | 0.14  | 5.05E-03 | 6.27E-15 | 3.73E-04 | 236.27 |
| 10 | 125680419 | rs9423279  | G | C | -0.0205 | 0.641 | 3.71E-03 | 3.21E-08 | 1.94E-04 | 122.57 |

|    |           |             |   |   |         |        |          |          |          |        |
|----|-----------|-------------|---|---|---------|--------|----------|----------|----------|--------|
| 11 | 7950797   | rs4523689   | G | A | -0.0206 | 0.408  | 3.64E-03 | 1.55E-08 | 2.05E-04 | 129.86 |
| 11 | 27679916  | rs6265      | T | C | -0.0318 | 0.203  | 4.58E-03 | 3.77E-12 | 3.27E-04 | 206.95 |
| 11 | 85980958  | rs7929518   | G | A | 0.0242  | 0.765  | 4.28E-03 | 1.56E-08 | 2.11E-04 | 133.69 |
| 11 | 112911004 | rs7938812   | G | T | 0.0438  | 0.424  | 3.64E-03 | 2.71E-33 | 9.37E-04 | 593.29 |
| 12 | 16748721  | rs11057005  | G | A | -0.0209 | 0.43   | 3.58E-03 | 4.85E-09 | 2.15E-04 | 135.91 |
| 12 | 56508409  | rs4759228   | C | G | -0.0217 | 0.27   | 3.93E-03 | 3.58E-08 | 1.85E-04 | 117.39 |
| 12 | 69655167  | rs7969559   | G | A | -0.0244 | 0.688  | 3.96E-03 | 7.31E-10 | 2.55E-04 | 161.46 |
| 12 | 121389500 | rs1971318   | T | C | 0.0285  | 0.141  | 4.93E-03 | 7.06E-09 | 1.97E-04 | 124.60 |
| 13 | 38357471  | rs3904512   | A | G | -0.0212 | 0.429  | 3.58E-03 | 3.23E-09 | 2.19E-04 | 138.83 |
| 14 | 29500130  | rs76214862  | C | A | -0.0250 | 0.202  | 4.55E-03 | 3.99E-08 | 2.01E-04 | 127.43 |
| 15 | 47935843  | rs1435741   | A | G | 0.0294  | 0.425  | 3.59E-03 | 2.64E-16 | 4.23E-04 | 267.72 |
| 15 | 83922387  | rs12441907  | A | C | -0.0292 | 0.186  | 4.52E-03 | 1.06E-10 | 2.58E-04 | 163.48 |
| 16 | 717085    | rs7197072   | T | C | -0.0248 | 0.238  | 4.17E-03 | 2.77E-09 | 2.22E-04 | 140.82 |
| 16 | 17572674  | rs4781977   | C | T | -0.0239 | 0.205  | 4.36E-03 | 4.54E-08 | 1.86E-04 | 117.51 |
| 16 | 65604652  | rs4785836   | C | T | -0.0205 | 0.398  | 3.66E-03 | 2.26E-08 | 2.01E-04 | 127.09 |
| 16 | 87443734  | rs1050847   | T | C | -0.0216 | 0.505  | 3.59E-03 | 1.67E-09 | 2.34E-04 | 147.96 |
| 17 | 2072949   | rs11658881  | G | A | 0.0201  | 0.418  | 3.61E-03 | 2.43E-08 | 1.97E-04 | 124.86 |
| 17 | 7795972   | rs11078713  | G | A | -0.0202 | 0.454  | 3.61E-03 | 2.23E-08 | 2.02E-04 | 127.68 |
| 17 | 30657058  | rs7224742   | T | C | -0.0207 | 0.595  | 3.66E-03 | 1.43E-08 | 2.07E-04 | 130.83 |
| 18 | 42632652  | rs72896886  | C | G | -0.0269 | 0.144  | 4.84E-03 | 2.75E-08 | 1.78E-04 | 112.81 |
| 18 | 72535282  | rs11872397  | A | G | -0.0248 | 0.252  | 4.09E-03 | 1.43E-09 | 2.31E-04 | 146.43 |
| 19 | 4474725   | rs76608582  | A | C | -0.0496 | 0.0389 | 8.26E-03 | 1.94E-09 | 1.84E-04 | 116.23 |
| 21 | 40555561  | rs117143374 | C | T | 0.0293  | 0.12   | 5.27E-03 | 2.76E-08 | 1.81E-04 | 114.68 |
| 22 | 28781758  | rs134529    | C | T | -0.0200 | 0.349  | 3.66E-03 | 4.85E-08 | 1.81E-04 | 114.85 |

**Table S20. Details of SNPs used for MR analysis of smoking initiation on Seropositive RA.**

| chr | pos | SNP | effect_allele | other_allele | beta | eaf | se | pval | R <sup>2</sup> | F |
|-----|-----|-----|---------------|--------------|------|-----|----|------|----------------|---|
|-----|-----|-----|---------------|--------------|------|-----|----|------|----------------|---|



|   |           |            |   |   |         |       |          |          |          |        |
|---|-----------|------------|---|---|---------|-------|----------|----------|----------|--------|
| 1 | 8481016   | rs301805   | G | T | 0.0215  | 0.559 | 3.61E-03 | 2.80E-09 | 2.27E-04 | 143.82 |
| 1 | 44037685  | rs3001723  | A | G | 0.0335  | 0.321 | 3.90E-03 | 8.12E-18 | 4.90E-04 | 309.94 |
| 1 | 50625979  | rs6669839  | T | C | 0.0260  | 0.204 | 4.40E-03 | 3.36E-09 | 2.20E-04 | 139.00 |
| 1 | 73766037  | rs7555507  | T | C | -0.0241 | 0.496 | 3.56E-03 | 1.14E-11 | 2.91E-04 | 184.49 |
| 1 | 87905828  | rs2050586  | C | G | -0.0205 | 0.355 | 3.71E-03 | 3.00E-08 | 1.93E-04 | 122.36 |
| 1 | 91196176  | rs12042107 | C | T | -0.0223 | 0.527 | 3.57E-03 | 4.22E-10 | 2.48E-04 | 156.69 |
| 1 | 154205120 | rs12025237 | C | A | -0.0330 | 0.124 | 5.34E-03 | 6.52E-10 | 2.37E-04 | 149.74 |
| 1 | 210304319 | rs2046850  | T | C | -0.0248 | 0.187 | 4.48E-03 | 3.03E-08 | 1.87E-04 | 118.49 |
| 2 | 623976    | rs6728726  | C | T | 0.0354  | 0.829 | 4.73E-03 | 6.73E-14 | 3.56E-04 | 225.53 |
| 2 | 45143175  | rs578584   | T | A | 0.0287  | 0.605 | 3.60E-03 | 1.50E-15 | 3.93E-04 | 248.87 |
| 2 | 104088751 | rs266047   | A | G | -0.0305 | 0.529 | 3.74E-03 | 3.36E-16 | 4.64E-04 | 293.67 |
| 2 | 137542847 | rs35702515 | T | G | 0.0252  | 0.162 | 4.23E-03 | 2.43E-09 | 1.73E-04 | 109.51 |
| 2 | 146143090 | rs13030994 | A | G | 0.0361  | 0.485 | 3.56E-03 | 3.56E-24 | 6.51E-04 | 412.06 |
| 2 | 155682556 | rs1445649  | C | T | 0.0240  | 0.525 | 3.56E-03 | 1.68E-11 | 2.87E-04 | 181.74 |
| 2 | 162802993 | rs12474587 | T | G | 0.0276  | 0.404 | 3.58E-03 | 1.25E-14 | 3.68E-04 | 232.78 |
| 2 | 182034448 | rs6433897  | C | T | 0.0224  | 0.754 | 4.06E-03 | 3.16E-08 | 1.87E-04 | 118.32 |
| 2 | 200937901 | rs2107300  | G | C | -0.0272 | 0.845 | 4.93E-03 | 3.27E-08 | 1.94E-04 | 122.67 |
| 2 | 226332033 | rs4674993  | G | A | -0.0252 | 0.207 | 4.44E-03 | 1.32E-08 | 2.09E-04 | 132.08 |
| 3 | 5724536   | rs1869243  | C | T | 0.0197  | 0.481 | 3.56E-03 | 2.97E-08 | 1.95E-04 | 123.15 |
| 3 | 50224225  | rs12632110 | G | A | -0.0234 | 0.647 | 3.75E-03 | 4.78E-10 | 2.50E-04 | 158.00 |
| 3 | 75009019  | rs11712680 | C | A | -0.0270 | 0.174 | 4.58E-03 | 3.51E-09 | 2.10E-04 | 133.10 |
| 3 | 85624131  | rs6788098  | T | A | -0.0313 | 0.623 | 3.69E-03 | 1.91E-17 | 4.62E-04 | 292.21 |
| 3 | 85766025  | rs9835772  | T | A | 0.0240  | 0.235 | 4.14E-03 | 6.32E-09 | 2.08E-04 | 131.60 |
| 3 | 85985324  | rs66680800 | T | G | -0.0203 | 0.397 | 3.65E-03 | 2.83E-08 | 1.97E-04 | 124.53 |
| 3 | 117804154 | rs1154693  | G | A | 0.0326  | 0.856 | 4.91E-03 | 3.12E-11 | 2.62E-04 | 166.06 |
| 4 | 28473524  | rs962625   | G | A | 0.0237  | 0.24  | 4.04E-03 | 4.37E-09 | 2.05E-04 | 129.89 |

---

|   |           |            |   |   |         |       |          |          |          |        |
|---|-----------|------------|---|---|---------|-------|----------|----------|----------|--------|
| 4 | 67825894  | rs993700   | C | T | -0.0259 | 0.766 | 4.29E-03 | 1.53E-09 | 2.41E-04 | 152.54 |
| 4 | 140927812 | rs13145728 | C | G | -0.0233 | 0.358 | 3.66E-03 | 2.14E-10 | 2.49E-04 | 157.29 |
| 4 | 147797214 | rs10001365 | A | G | -0.0250 | 0.405 | 3.64E-03 | 6.65E-12 | 3.01E-04 | 190.54 |
| 5 | 60374912  | rs6893752  | G | A | -0.0241 | 0.766 | 4.07E-03 | 3.25E-09 | 2.08E-04 | 131.78 |
| 5 | 87756821  | rs4352629  | T | C | -0.0275 | 0.492 | 3.57E-03 | 1.22E-14 | 3.79E-04 | 239.80 |
| 5 | 103816655 | rs12186738 | T | G | -0.0333 | 0.154 | 5.02E-03 | 3.42E-11 | 2.88E-04 | 182.50 |
| 5 | 106834363 | rs72789632 | T | C | -0.0329 | 0.12  | 5.29E-03 | 5.02E-10 | 2.28E-04 | 144.57 |
| 5 | 154839646 | rs1385108  | T | C | 0.0247  | 0.239 | 4.16E-03 | 3.00E-09 | 2.21E-04 | 140.03 |
| 5 | 166989513 | rs4044321  | G | A | -0.0278 | 0.642 | 3.71E-03 | 6.08E-14 | 3.56E-04 | 225.56 |
| 6 | 52916062  | rs222449   | T | A | -0.0253 | 0.793 | 4.43E-03 | 1.08E-08 | 2.10E-04 | 133.23 |
| 6 | 67405337  | rs10498846 | T | C | 0.0206  | 0.473 | 3.56E-03 | 6.62E-09 | 2.12E-04 | 134.04 |
| 6 | 98748008  | rs9401770  | A | G | 0.0277  | 0.273 | 3.99E-03 | 3.47E-12 | 3.05E-04 | 193.22 |
| 6 | 108994161 | rs3800227  | G | A | 0.0228  | 0.701 | 4.06E-03 | 1.93E-08 | 2.18E-04 | 138.07 |
| 6 | 111644332 | rs240963   | C | T | -0.0410 | 0.836 | 4.84E-03 | 2.16E-17 | 4.62E-04 | 292.45 |
| 7 | 1708080   | rs4236259  | G | T | -0.0248 | 0.499 | 3.56E-03 | 3.35E-12 | 3.07E-04 | 194.17 |
| 7 | 1889773   | rs10260968 | A | G | -0.0203 | 0.597 | 3.61E-03 | 1.75E-08 | 1.99E-04 | 125.77 |
| 7 | 3407568   | rs2140114  | T | C | -0.0233 | 0.518 | 3.73E-03 | 4.70E-10 | 2.70E-04 | 170.99 |
| 7 | 69735251  | rs12112638 | G | A | -0.0245 | 0.275 | 4.04E-03 | 1.34E-09 | 2.40E-04 | 151.82 |
| 7 | 96638267  | rs3801289  | C | A | -0.0221 | 0.351 | 3.74E-03 | 3.74E-09 | 2.22E-04 | 140.35 |
| 7 | 99185406  | rs12333760 | C | T | -0.0290 | 0.204 | 4.80E-03 | 1.44E-09 | 2.74E-04 | 173.44 |
| 7 | 117523709 | rs10233018 | G | A | 0.0271  | 0.503 | 3.56E-03 | 2.75E-14 | 3.66E-04 | 231.91 |
| 7 | 133589846 | rs10279261 | A | G | -0.0214 | 0.619 | 3.66E-03 | 5.00E-09 | 2.16E-04 | 136.97 |
| 8 | 27426077  | rs1565735  | A | T | -0.0376 | 0.212 | 4.46E-03 | 3.42E-17 | 4.73E-04 | 299.33 |
| 8 | 59814666  | rs13261666 | T | G | -0.0269 | 0.522 | 3.56E-03 | 3.90E-14 | 3.61E-04 | 228.50 |
| 8 | 65073605  | rs12545053 | G | A | 0.0203  | 0.397 | 3.64E-03 | 2.43E-08 | 1.97E-04 | 124.64 |
| 8 | 91995577  | rs2631024  | G | A | -0.0230 | 0.737 | 4.03E-03 | 1.18E-08 | 2.04E-04 | 129.40 |
| 8 | 93201036  | rs1899896  | T | C | 0.0264  | 0.286 | 3.89E-03 | 1.04E-11 | 2.86E-04 | 180.83 |

---

|    |           |            |   |   |         |       |          |          |          |        |
|----|-----------|------------|---|---|---------|-------|----------|----------|----------|--------|
| 9  | 3014254   | rs4543592  | C | T | 0.0219  | 0.468 | 3.56E-03 | 7.46E-10 | 2.40E-04 | 151.60 |
| 9  | 86707289  | rs2378662  | A | G | 0.0209  | 0.556 | 3.57E-03 | 4.16E-09 | 2.17E-04 | 137.13 |
| 10 | 8803551   | rs10905461 | C | T | -0.0240 | 0.718 | 4.15E-03 | 7.35E-09 | 2.32E-04 | 147.09 |
| 10 | 21766969  | rs10159545 | G | C | 0.0263  | 0.375 | 3.73E-03 | 1.84E-12 | 3.23E-04 | 204.46 |
| 10 | 104563808 | rs12356821 | C | G | 0.0394  | 0.14  | 5.05E-03 | 6.27E-15 | 3.73E-04 | 236.27 |
| 10 | 125680419 | rs9423279  | G | C | -0.0205 | 0.641 | 3.71E-03 | 3.21E-08 | 1.94E-04 | 122.57 |
| 11 | 7950797   | rs4523689  | G | A | -0.0206 | 0.408 | 3.64E-03 | 1.55E-08 | 2.05E-04 | 129.86 |
| 11 | 27679916  | rs6265     | T | C | -0.0318 | 0.203 | 4.58E-03 | 3.77E-12 | 3.27E-04 | 206.95 |
| 11 | 85980958  | rs7929518  | G | A | 0.0242  | 0.765 | 4.28E-03 | 1.56E-08 | 2.11E-04 | 133.69 |
| 11 | 112911004 | rs7938812  | G | T | 0.0438  | 0.424 | 3.64E-03 | 2.71E-33 | 9.37E-04 | 593.29 |
| 12 | 16748721  | rs11057005 | G | A | -0.0209 | 0.43  | 3.58E-03 | 4.85E-09 | 2.15E-04 | 135.91 |
| 12 | 56508409  | rs4759228  | C | G | -0.0217 | 0.27  | 3.93E-03 | 3.58E-08 | 1.85E-04 | 117.39 |
| 12 | 69655167  | rs7969559  | G | A | -0.0244 | 0.688 | 3.96E-03 | 7.31E-10 | 2.55E-04 | 161.46 |
| 12 | 121389500 | rs1971318  | T | C | 0.0285  | 0.141 | 4.93E-03 | 7.06E-09 | 1.97E-04 | 124.60 |
| 13 | 38357471  | rs3904512  | A | G | -0.0212 | 0.429 | 3.58E-03 | 3.23E-09 | 2.19E-04 | 138.83 |
| 14 | 29500130  | rs76214862 | C | A | -0.0250 | 0.202 | 4.55E-03 | 3.99E-08 | 2.01E-04 | 127.43 |
| 15 | 47935843  | rs1435741  | A | G | 0.0294  | 0.425 | 3.59E-03 | 2.64E-16 | 4.23E-04 | 267.72 |
| 15 | 83922387  | rs12441907 | A | C | -0.0292 | 0.186 | 4.52E-03 | 1.06E-10 | 2.58E-04 | 163.48 |
| 16 | 717085    | rs7197072  | T | C | -0.0248 | 0.238 | 4.17E-03 | 2.77E-09 | 2.22E-04 | 140.82 |
| 16 | 17572674  | rs4781977  | C | T | -0.0239 | 0.205 | 4.36E-03 | 4.54E-08 | 1.86E-04 | 117.51 |
| 16 | 65604652  | rs4785836  | C | T | -0.0205 | 0.398 | 3.66E-03 | 2.26E-08 | 2.01E-04 | 127.09 |
| 16 | 87443734  | rs1050847  | T | C | -0.0216 | 0.505 | 3.59E-03 | 1.67E-09 | 2.34E-04 | 147.96 |
| 17 | 2072949   | rs11658881 | G | A | 0.0201  | 0.418 | 3.61E-03 | 2.43E-08 | 1.97E-04 | 124.86 |
| 17 | 7795972   | rs11078713 | G | A | -0.0202 | 0.454 | 3.61E-03 | 2.23E-08 | 2.02E-04 | 127.68 |
| 17 | 30657058  | rs7224742  | T | C | -0.0207 | 0.595 | 3.66E-03 | 1.43E-08 | 2.07E-04 | 130.83 |
| 18 | 42632652  | rs72896886 | C | G | -0.0269 | 0.144 | 4.84E-03 | 2.75E-08 | 1.78E-04 | 112.81 |

|    |          |             |   |   |         |        |          |          |          |        |
|----|----------|-------------|---|---|---------|--------|----------|----------|----------|--------|
| 18 | 72535282 | rs11872397  | A | G | -0.0248 | 0.252  | 4.09E-03 | 1.43E-09 | 2.31E-04 | 146.43 |
| 19 | 4474725  | rs76608582  | A | C | -0.0496 | 0.0389 | 8.26E-03 | 1.94E-09 | 1.84E-04 | 116.23 |
| 21 | 40555561 | rs117143374 | C | T | 0.0293  | 0.12   | 5.27E-03 | 2.76E-08 | 1.81E-04 | 114.68 |
| 22 | 28781758 | rs134529    | C | T | -0.0200 | 0.349  | 3.66E-03 | 4.85E-08 | 1.81E-04 | 114.85 |

**Table S21. Details of SNPs used for MR analysis of Coffee intake on HOA.**

| chr | pos       | SNP         | effect_allele | other_allele | beta    | eaf   | se       | pval     | R <sup>2</sup> | F     |
|-----|-----------|-------------|---------------|--------------|---------|-------|----------|----------|----------------|-------|
| 2   | 27742603  | rs780093    | C             | T            | 0.0133  | 0.616 | 1.66E-03 | 1.00E-15 | 8.36E-05       | 35.86 |
| 2   | 49368391  | rs12989746  | T             | G            | 0.0104  | 0.250 | 1.86E-03 | 2.80E-08 | 4.02E-05       | 17.23 |
| 2   | 62780440  | rs1527961   | C             | T            | -0.0133 | 0.135 | 2.37E-03 | 1.70E-08 | 4.16E-05       | 17.82 |
| 4   | 17424930  | rs2597805   | T             | C            | 0.0099  | 0.682 | 1.76E-03 | 2.00E-08 | 4.21E-05       | 18.05 |
| 4   | 106075498 | rs2189234   | G             | T            | 0.0100  | 0.618 | 1.66E-03 | 1.80E-09 | 4.71E-05       | 20.20 |
| 5   | 7391462   | rs12514566  | A             | G            | -0.0114 | 0.337 | 1.71E-03 | 2.40E-11 | 5.81E-05       | 24.90 |
| 7   | 17570479  | rs73075167  | T             | A            | -0.0161 | 0.129 | 2.44E-03 | 5.00E-11 | 5.81E-05       | 24.90 |
| 7   | 32930597  | rs7811609   | T             | C            | 0.0091  | 0.375 | 1.66E-03 | 4.00E-08 | 3.91E-05       | 16.78 |
| 7   | 73037956  | rs34060476  | G             | A            | 0.0184  | 0.134 | 2.37E-03 | 7.50E-15 | 7.88E-05       | 33.78 |
| 7   | 75615006  | rs1057868   | T             | C            | 0.0200  | 0.285 | 1.79E-03 | 5.40E-29 | 1.62E-04       | 69.58 |
| 8   | 33790200  | rs78267637  | G             | C            | -0.0254 | 0.038 | 4.32E-03 | 3.90E-09 | 4.74E-05       | 20.33 |
| 8   | 109128653 | rs442355    | C             | G            | -0.0111 | 0.254 | 1.85E-03 | 1.90E-09 | 4.71E-05       | 20.18 |
| 8   | 110443480 | rs6469262   | C             | T            | -0.0092 | 0.565 | 1.63E-03 | 1.90E-08 | 4.12E-05       | 17.66 |
| 10  | 135315795 | rs117810762 | A             | G            | 0.0359  | 0.018 | 6.18E-03 | 6.20E-09 | 4.53E-05       | 19.42 |
| 12  | 11316437  | rs61928609  | C             | A            | -0.0147 | 0.835 | 2.18E-03 | 1.30E-11 | 5.97E-05       | 25.60 |
| 15  | 75174251  | rs117968677 | A             | G            | -0.0310 | 0.024 | 5.52E-03 | 1.90E-08 | 4.55E-05       | 19.51 |
| 16  | 70927078  | rs8056750   | T             | C            | 0.0105  | 0.359 | 1.74E-03 | 1.30E-09 | 5.11E-05       | 21.90 |
| 17  | 60150383  | rs57918684  | A             | G            | 0.0129  | 0.155 | 2.24E-03 | 8.60E-09 | 4.34E-05       | 18.63 |
| 18  | 40950954  | rs630194    | C             | T            | -0.0114 | 0.343 | 1.70E-03 | 2.30E-11 | 5.81E-05       | 24.93 |
| 18  | 55032486  | rs1942965   | C             | T            | -0.0089 | 0.505 | 1.62E-03 | 3.80E-08 | 3.96E-05       | 17.00 |

|    |          |            |   |   |         |       |          |          |          |       |
|----|----------|------------|---|---|---------|-------|----------|----------|----------|-------|
| 19 | 41353107 | rs56113850 | C | T | 0.0127  | 0.578 | 1.63E-03 | 8.90E-15 | 7.83E-05 | 33.57 |
| 20 | 45840459 | rs6063085  | C | A | 0.0104  | 0.373 | 1.67E-03 | 4.50E-10 | 5.07E-05 | 21.75 |
| 20 | 62891820 | rs6062682  | T | C | 0.0104  | 0.465 | 1.64E-03 | 2.50E-10 | 5.35E-05 | 22.95 |
| 22 | 24870527 | rs17842490 | G | A | -0.0452 | 0.014 | 6.81E-03 | 3.30E-11 | 5.73E-05 | 24.58 |
| 22 | 41215672 | rs13054099 | C | T | -0.0108 | 0.261 | 1.84E-03 | 4.30E-09 | 4.48E-05 | 19.22 |

**Table S22. Details of SNPs used for MR analysis of Coffee intake on KOA.**

| chr | pos       | SNP         | effect_allele | other_allele | beta    | eaf   | se       | pval     | R <sup>2</sup> | F     |
|-----|-----------|-------------|---------------|--------------|---------|-------|----------|----------|----------------|-------|
| 2   | 27742603  | rs780093    | C             | T            | 0.0133  | 0.616 | 1.66E-03 | 1.00E-15 | 8.36E-05       | 35.86 |
| 2   | 49368391  | rs12989746  | T             | G            | 0.0104  | 0.250 | 1.86E-03 | 2.80E-08 | 4.02E-05       | 17.23 |
| 2   | 62780440  | rs1527961   | C             | T            | -0.0133 | 0.135 | 2.37E-03 | 1.70E-08 | 4.16E-05       | 17.82 |
| 4   | 17424930  | rs2597805   | T             | C            | 0.0099  | 0.682 | 1.76E-03 | 2.00E-08 | 4.21E-05       | 18.05 |
| 4   | 106075498 | rs2189234   | G             | T            | 0.0100  | 0.618 | 1.66E-03 | 1.80E-09 | 4.71E-05       | 20.20 |
| 5   | 7391462   | rs12514566  | A             | G            | -0.0114 | 0.337 | 1.71E-03 | 2.40E-11 | 5.81E-05       | 24.90 |
| 7   | 17570479  | rs73075167  | T             | A            | -0.0161 | 0.129 | 2.44E-03 | 5.00E-11 | 5.81E-05       | 24.90 |
| 7   | 32930597  | rs7811609   | T             | C            | 0.0091  | 0.375 | 1.66E-03 | 4.00E-08 | 3.91E-05       | 16.78 |
| 7   | 73037956  | rs34060476  | G             | A            | 0.0184  | 0.134 | 2.37E-03 | 7.50E-15 | 7.88E-05       | 33.78 |
| 7   | 75615006  | rs1057868   | T             | C            | 0.0200  | 0.285 | 1.79E-03 | 5.40E-29 | 1.62E-04       | 69.58 |
| 8   | 33790200  | rs78267637  | G             | C            | -0.0254 | 0.038 | 4.32E-03 | 3.90E-09 | 4.74E-05       | 20.33 |
| 8   | 109128653 | rs442355    | C             | G            | -0.0111 | 0.254 | 1.85E-03 | 1.90E-09 | 4.71E-05       | 20.18 |
| 8   | 110443480 | rs6469262   | C             | T            | -0.0092 | 0.565 | 1.63E-03 | 1.90E-08 | 4.12E-05       | 17.66 |
| 10  | 135315795 | rs117810762 | A             | G            | 0.0359  | 0.018 | 6.18E-03 | 6.20E-09 | 4.53E-05       | 19.42 |
| 12  | 11316437  | rs61928609  | C             | A            | -0.0147 | 0.835 | 2.18E-03 | 1.30E-11 | 5.97E-05       | 25.60 |
| 15  | 75174251  | rs117968677 | A             | G            | -0.0310 | 0.024 | 5.52E-03 | 1.90E-08 | 4.55E-05       | 19.51 |
| 16  | 70927078  | rs8056750   | T             | C            | 0.0105  | 0.359 | 1.74E-03 | 1.30E-09 | 5.11E-05       | 21.90 |
| 17  | 46155786  | rs62064918  | T             | C            | -0.0103 | 0.245 | 1.88E-03 | 4.10E-08 | 3.93E-05       | 16.84 |

|    |          |            |   |   |         |       |          |          |          |       |
|----|----------|------------|---|---|---------|-------|----------|----------|----------|-------|
| 17 | 60150383 | rs57918684 | A | G | 0.0129  | 0.155 | 2.24E-03 | 8.60E-09 | 4.34E-05 | 18.63 |
| 18 | 40950954 | rs630194   | C | T | -0.0114 | 0.343 | 1.70E-03 | 2.30E-11 | 5.81E-05 | 24.93 |
| 18 | 55032486 | rs1942965  | C | T | -0.0089 | 0.505 | 1.62E-03 | 3.80E-08 | 3.96E-05 | 17.00 |
| 19 | 41353107 | rs56113850 | C | T | 0.0127  | 0.578 | 1.63E-03 | 8.90E-15 | 7.83E-05 | 33.57 |
| 20 | 45840459 | rs6063085  | C | A | 0.0104  | 0.373 | 1.67E-03 | 4.50E-10 | 5.07E-05 | 21.75 |
| 20 | 62891820 | rs6062682  | T | C | 0.0104  | 0.465 | 1.64E-03 | 2.50E-10 | 5.35E-05 | 22.95 |
| 22 | 24870527 | rs17842490 | G | A | -0.0452 | 0.014 | 6.81E-03 | 3.30E-11 | 5.73E-05 | 24.58 |
| 22 | 41215672 | rs13054099 | C | T | -0.0108 | 0.261 | 1.84E-03 | 4.30E-09 | 4.48E-05 | 19.22 |

**Table S23. Details of SNPs used for MR analysis of Coffee intake on RA(M13).**

| chr | pos       | SNP        | effect_allele | other_allele | beta    | eaf   | se       | pval      | R <sup>2</sup> | F      |
|-----|-----------|------------|---------------|--------------|---------|-------|----------|-----------|----------------|--------|
| 1   | 96274668  | rs4615895  | A             | G            | 0.0122  | 0.741 | 1.85E-03 | 4.20E-11  | 5.72E-05       | 24.52  |
| 1   | 177855517 | rs516636   | A             | C            | 0.0117  | 0.209 | 1.98E-03 | 4.00E-09  | 4.51E-05       | 19.33  |
| 2   | 637498    | rs13387939 | A             | C            | 0.0166  | 0.828 | 2.14E-03 | 9.80E-15  | 7.79E-05       | 33.43  |
| 2   | 27742603  | rs780093   | C             | T            | 0.0133  | 0.616 | 1.66E-03 | 1.00E-15  | 8.36E-05       | 35.86  |
| 2   | 49368391  | rs12989746 | T             | G            | 0.0104  | 0.250 | 1.86E-03 | 2.80E-08  | 4.02E-05       | 17.23  |
| 2   | 62780440  | rs1527961  | C             | T            | -0.0133 | 0.135 | 2.37E-03 | 1.70E-08  | 4.16E-05       | 17.82  |
| 4   | 17424930  | rs2597805  | T             | C            | 0.0099  | 0.682 | 1.76E-03 | 2.00E-08  | 4.21E-05       | 18.05  |
| 4   | 106075498 | rs2189234  | G             | T            | 0.0100  | 0.618 | 1.66E-03 | 1.80E-09  | 4.71E-05       | 20.20  |
| 5   | 7391462   | rs12514566 | A             | G            | -0.0114 | 0.337 | 1.71E-03 | 2.40E-11  | 5.81E-05       | 24.90  |
| 5   | 87943710  | rs13163336 | A             | C            | 0.0149  | 0.158 | 2.21E-03 | 1.30E-11  | 5.93E-05       | 25.44  |
| 6   | 51179260  | rs2465037  | A             | C            | -0.0106 | 0.343 | 1.71E-03 | 4.80E-10  | 5.09E-05       | 21.85  |
| 6   | 98312143  | rs1338549  | G             | T            | -0.0095 | 0.534 | 1.62E-03 | 5.60E-09  | 4.45E-05       | 19.07  |
| 6   | 108983527 | rs9398171  | T             | C            | 0.0109  | 0.711 | 1.78E-03 | 1.10E-09  | 4.85E-05       | 20.79  |
| 7   | 17284577  | rs4410790  | C             | T            | 0.0391  | 0.632 | 1.67E-03 | 1.20E-120 | 7.10E-04       | 304.70 |
| 7   | 17570479  | rs73075167 | T             | A            | -0.0161 | 0.129 | 2.44E-03 | 5.00E-11  | 5.81E-05       | 24.90  |
| 7   | 32930597  | rs7811609  | T             | C            | 0.0091  | 0.375 | 1.66E-03 | 4.00E-08  | 3.91E-05       | 16.78  |

|    |           |             |   |   |         |       |          |           |          |        |
|----|-----------|-------------|---|---|---------|-------|----------|-----------|----------|--------|
| 7  | 73037956  | rs34060476  | G | A | 0.0184  | 0.134 | 2.37E-03 | 7.50E-15  | 7.88E-05 | 33.78  |
| 7  | 75615006  | rs1057868   | T | C | 0.0200  | 0.285 | 1.79E-03 | 5.40E-29  | 1.62E-04 | 69.58  |
| 8  | 33790200  | rs78267637  | G | C | -0.0254 | 0.038 | 4.32E-03 | 3.90E-09  | 4.74E-05 | 20.33  |
| 8  | 109128653 | rs442355    | C | G | -0.0111 | 0.254 | 1.85E-03 | 1.90E-09  | 4.71E-05 | 20.18  |
| 8  | 110443480 | rs6469262   | C | T | -0.0092 | 0.565 | 1.63E-03 | 1.90E-08  | 4.12E-05 | 17.66  |
| 10 | 135315795 | rs117810762 | A | G | 0.0359  | 0.018 | 6.18E-03 | 6.20E-09  | 4.53E-05 | 19.42  |
| 12 | 11316437  | rs61928609  | C | A | -0.0147 | 0.835 | 2.18E-03 | 1.30E-11  | 5.97E-05 | 25.60  |
| 15 | 75027880  | rs2472297   | T | C | 0.0465  | 0.263 | 1.83E-03 | 1.10E-142 | 8.37E-04 | 359.22 |
| 15 | 75174251  | rs117968677 | A | G | -0.0310 | 0.024 | 5.52E-03 | 1.90E-08  | 4.55E-05 | 19.51  |
| 16 | 53800954  | rs1421085   | C | T | 0.0185  | 0.404 | 1.64E-03 | 1.70E-29  | 1.66E-04 | 71.00  |
| 16 | 70927078  | rs8056750   | T | C | 0.0105  | 0.359 | 1.74E-03 | 1.30E-09  | 5.11E-05 | 21.90  |
| 17 | 46155786  | rs62064918  | T | C | -0.0103 | 0.245 | 1.88E-03 | 4.10E-08  | 3.93E-05 | 16.84  |
| 17 | 60150383  | rs57918684  | A | G | 0.0129  | 0.155 | 2.24E-03 | 8.60E-09  | 4.34E-05 | 18.63  |
| 18 | 40950954  | rs630194    | C | T | -0.0114 | 0.343 | 1.70E-03 | 2.30E-11  | 5.81E-05 | 24.93  |
| 18 | 55032486  | rs1942965   | C | T | -0.0089 | 0.505 | 1.62E-03 | 3.80E-08  | 3.96E-05 | 17.00  |
| 18 | 57852587  | rs476828    | C | T | 0.0173  | 0.237 | 1.90E-03 | 5.60E-20  | 1.09E-04 | 46.73  |
| 19 | 18495908  | rs75347775  | A | G | 0.0105  | 0.245 | 1.88E-03 | 2.70E-08  | 4.04E-05 | 17.31  |
| 19 | 41353107  | rs56113850  | C | T | 0.0127  | 0.578 | 1.63E-03 | 8.90E-15  | 7.83E-05 | 33.57  |
| 20 | 45840459  | rs6063085   | C | A | 0.0104  | 0.373 | 1.67E-03 | 4.50E-10  | 5.07E-05 | 21.75  |
| 20 | 62891820  | rs6062682   | T | C | 0.0104  | 0.465 | 1.64E-03 | 2.50E-10  | 5.35E-05 | 22.95  |
| 22 | 24870527  | rs17842490  | G | A | -0.0452 | 0.014 | 6.81E-03 | 3.30E-11  | 5.73E-05 | 24.58  |
| 22 | 41215672  | rs13054099  | C | T | -0.0108 | 0.261 | 1.84E-03 | 4.30E-09  | 4.48E-05 | 19.22  |

**Table S24. Details of SNPs used for MR analysis of Coffee intake on Seronegative RA.**

| chr | pos      | SNP       | effect_allele | other_allele | beta   | eaf   | se       | pval     | R <sup>2</sup> | F     |
|-----|----------|-----------|---------------|--------------|--------|-------|----------|----------|----------------|-------|
| 1   | 96274668 | rs4615895 | A             | G            | 0.0122 | 0.741 | 1.85E-03 | 4.20E-11 | 5.72E-05       | 24.52 |

|    |           |             |   |   |         |       |          |           |          |        |
|----|-----------|-------------|---|---|---------|-------|----------|-----------|----------|--------|
| 1  | 177855517 | rs516636    | A | C | 0.0117  | 0.209 | 1.98E-03 | 4.00E-09  | 4.51E-05 | 19.33  |
| 2  | 637498    | rs13387939  | A | C | 0.0166  | 0.828 | 2.14E-03 | 9.80E-15  | 7.79E-05 | 33.43  |
| 2  | 27742603  | rs780093    | C | T | 0.0133  | 0.616 | 1.66E-03 | 1.00E-15  | 8.36E-05 | 35.86  |
| 2  | 49368391  | rs12989746  | T | G | 0.0104  | 0.250 | 1.86E-03 | 2.80E-08  | 4.02E-05 | 17.23  |
| 2  | 62780440  | rs1527961   | C | T | -0.0133 | 0.135 | 2.37E-03 | 1.70E-08  | 4.16E-05 | 17.82  |
| 4  | 17424930  | rs2597805   | T | C | 0.0099  | 0.682 | 1.76E-03 | 2.00E-08  | 4.21E-05 | 18.05  |
| 4  | 106075498 | rs2189234   | G | T | 0.0100  | 0.618 | 1.66E-03 | 1.80E-09  | 4.71E-05 | 20.20  |
| 5  | 7391462   | rs12514566  | A | G | -0.0114 | 0.337 | 1.71E-03 | 2.40E-11  | 5.81E-05 | 24.90  |
| 5  | 87943710  | rs13163336  | A | C | 0.0149  | 0.158 | 2.21E-03 | 1.30E-11  | 5.93E-05 | 25.44  |
| 6  | 51179260  | rs2465037   | A | C | -0.0106 | 0.343 | 1.71E-03 | 4.80E-10  | 5.09E-05 | 21.85  |
| 6  | 98312143  | rs1338549   | G | T | -0.0095 | 0.534 | 1.62E-03 | 5.60E-09  | 4.45E-05 | 19.07  |
| 6  | 108983527 | rs9398171   | T | C | 0.0109  | 0.711 | 1.78E-03 | 1.10E-09  | 4.85E-05 | 20.79  |
| 7  | 17284577  | rs4410790   | C | T | 0.0391  | 0.632 | 1.67E-03 | 1.20E-120 | 7.10E-04 | 304.70 |
| 7  | 17570479  | rs73075167  | T | A | -0.0161 | 0.129 | 2.44E-03 | 5.00E-11  | 5.81E-05 | 24.90  |
| 7  | 32930597  | rs7811609   | T | C | 0.0091  | 0.375 | 1.66E-03 | 4.00E-08  | 3.91E-05 | 16.78  |
| 7  | 73037956  | rs34060476  | G | A | 0.0184  | 0.134 | 2.37E-03 | 7.50E-15  | 7.88E-05 | 33.78  |
| 7  | 75615006  | rs1057868   | T | C | 0.0200  | 0.285 | 1.79E-03 | 5.40E-29  | 1.62E-04 | 69.58  |
| 8  | 33790200  | rs78267637  | G | C | -0.0254 | 0.038 | 4.32E-03 | 3.90E-09  | 4.74E-05 | 20.33  |
| 8  | 109128653 | rs442355    | C | G | -0.0111 | 0.254 | 1.85E-03 | 1.90E-09  | 4.71E-05 | 20.18  |
| 8  | 110443480 | rs6469262   | C | T | -0.0092 | 0.565 | 1.63E-03 | 1.90E-08  | 4.12E-05 | 17.66  |
| 10 | 135315795 | rs117810762 | A | G | 0.0359  | 0.018 | 6.18E-03 | 6.20E-09  | 4.53E-05 | 19.42  |
| 12 | 11316437  | rs61928609  | C | A | -0.0147 | 0.835 | 2.18E-03 | 1.30E-11  | 5.97E-05 | 25.60  |
| 15 | 75027880  | rs2472297   | T | C | 0.0465  | 0.263 | 1.83E-03 | 1.10E-142 | 8.37E-04 | 359.22 |
| 15 | 75174251  | rs117968677 | A | G | -0.0310 | 0.024 | 5.52E-03 | 1.90E-08  | 4.55E-05 | 19.51  |
| 16 | 53800954  | rs1421085   | C | T | 0.0185  | 0.404 | 1.64E-03 | 1.70E-29  | 1.66E-04 | 71.00  |
| 16 | 70927078  | rs8056750   | T | C | 0.0105  | 0.359 | 1.74E-03 | 1.30E-09  | 5.11E-05 | 21.90  |
| 17 | 46155786  | rs62064918  | T | C | -0.0103 | 0.245 | 1.88E-03 | 4.10E-08  | 3.93E-05 | 16.84  |



|    |          |            |   |   |         |       |          |          |          |       |
|----|----------|------------|---|---|---------|-------|----------|----------|----------|-------|
| 17 | 60150383 | rs57918684 | A | G | 0.0129  | 0.155 | 2.24E-03 | 8.60E-09 | 4.34E-05 | 18.63 |
| 18 | 40950954 | rs630194   | C | T | -0.0114 | 0.343 | 1.70E-03 | 2.30E-11 | 5.81E-05 | 24.93 |
| 18 | 55032486 | rs1942965  | C | T | -0.0089 | 0.505 | 1.62E-03 | 3.80E-08 | 3.96E-05 | 17.00 |
| 18 | 57852587 | rs476828   | C | T | 0.0173  | 0.237 | 1.90E-03 | 5.60E-20 | 1.09E-04 | 46.73 |
| 19 | 18495908 | rs75347775 | A | G | 0.0105  | 0.245 | 1.88E-03 | 2.70E-08 | 4.04E-05 | 17.31 |
| 19 | 41353107 | rs56113850 | C | T | 0.0127  | 0.578 | 1.63E-03 | 8.90E-15 | 7.83E-05 | 33.57 |
| 20 | 45840459 | rs6063085  | C | A | 0.0104  | 0.373 | 1.67E-03 | 4.50E-10 | 5.07E-05 | 21.75 |
| 20 | 62891820 | rs6062682  | T | C | 0.0104  | 0.465 | 1.64E-03 | 2.50E-10 | 5.35E-05 | 22.95 |
| 22 | 24870527 | rs17842490 | G | A | -0.0452 | 0.014 | 6.81E-03 | 3.30E-11 | 5.73E-05 | 24.58 |
| 22 | 41215672 | rs13054099 | C | T | -0.0108 | 0.261 | 1.84E-03 | 4.30E-09 | 4.48E-05 | 19.22 |

**Table S25. Details of SNPs used for MR analysis of Coffee intake on Seropositive RA.**

| chr | pos       | SNP        | effect_allele | other_allele | beta    | eaf   | se       | pval     | R <sup>2</sup> | F     |
|-----|-----------|------------|---------------|--------------|---------|-------|----------|----------|----------------|-------|
| 1   | 96274668  | rs4615895  | A             | G            | 0.0122  | 0.741 | 1.85E-03 | 4.20E-11 | 5.72E-05       | 24.52 |
| 1   | 177855517 | rs516636   | A             | C            | 0.0117  | 0.209 | 1.98E-03 | 4.00E-09 | 4.51E-05       | 19.33 |
| 2   | 637498    | rs13387939 | A             | C            | 0.0166  | 0.828 | 2.14E-03 | 9.80E-15 | 7.79E-05       | 33.43 |
| 2   | 27742603  | rs780093   | C             | T            | 0.0133  | 0.616 | 1.66E-03 | 1.00E-15 | 8.36E-05       | 35.86 |
| 2   | 49368391  | rs12989746 | T             | G            | 0.0104  | 0.250 | 1.86E-03 | 2.80E-08 | 4.02E-05       | 17.23 |
| 2   | 62780440  | rs1527961  | C             | T            | -0.0133 | 0.135 | 2.37E-03 | 1.70E-08 | 4.16E-05       | 17.82 |
| 4   | 17424930  | rs2597805  | T             | C            | 0.0099  | 0.682 | 1.76E-03 | 2.00E-08 | 4.21E-05       | 18.05 |
| 4   | 106075498 | rs2189234  | G             | T            | 0.0100  | 0.618 | 1.66E-03 | 1.80E-09 | 4.71E-05       | 20.20 |
| 5   | 7391462   | rs12514566 | A             | G            | -0.0114 | 0.337 | 1.71E-03 | 2.40E-11 | 5.81E-05       | 24.90 |
| 5   | 87943710  | rs13163336 | A             | C            | 0.0149  | 0.158 | 2.21E-03 | 1.30E-11 | 5.93E-05       | 25.44 |
| 6   | 51179260  | rs2465037  | A             | C            | -0.0106 | 0.343 | 1.71E-03 | 4.80E-10 | 5.09E-05       | 21.85 |
| 6   | 98312143  | rs1338549  | G             | T            | -0.0095 | 0.534 | 1.62E-03 | 5.60E-09 | 4.45E-05       | 19.07 |
| 6   | 108983527 | rs9398171  | T             | C            | 0.0109  | 0.711 | 1.78E-03 | 1.10E-09 | 4.85E-05       | 20.79 |

|    |           |             |   |   |         |       |          |           |          |        |
|----|-----------|-------------|---|---|---------|-------|----------|-----------|----------|--------|
| 7  | 17284577  | rs4410790   | C | T | 0.0391  | 0.632 | 1.67E-03 | 1.20E-120 | 7.10E-04 | 304.70 |
| 7  | 17570479  | rs73075167  | T | A | -0.0161 | 0.129 | 2.44E-03 | 5.00E-11  | 5.81E-05 | 24.90  |
| 7  | 32930597  | rs7811609   | T | C | 0.0091  | 0.375 | 1.66E-03 | 4.00E-08  | 3.91E-05 | 16.78  |
| 7  | 73037956  | rs34060476  | G | A | 0.0184  | 0.134 | 2.37E-03 | 7.50E-15  | 7.88E-05 | 33.78  |
| 7  | 75615006  | rs1057868   | T | C | 0.0200  | 0.285 | 1.79E-03 | 5.40E-29  | 1.62E-04 | 69.58  |
| 8  | 33790200  | rs78267637  | G | C | -0.0254 | 0.038 | 4.32E-03 | 3.90E-09  | 4.74E-05 | 20.33  |
| 8  | 109128653 | rs442355    | C | G | -0.0111 | 0.254 | 1.85E-03 | 1.90E-09  | 4.71E-05 | 20.18  |
| 8  | 110443480 | rs6469262   | C | T | -0.0092 | 0.565 | 1.63E-03 | 1.90E-08  | 4.12E-05 | 17.66  |
| 10 | 135315795 | rs117810762 | A | G | 0.0359  | 0.018 | 6.18E-03 | 6.20E-09  | 4.53E-05 | 19.42  |
| 12 | 11316437  | rs61928609  | C | A | -0.0147 | 0.835 | 2.18E-03 | 1.30E-11  | 5.97E-05 | 25.60  |
| 15 | 75027880  | rs2472297   | T | C | 0.0465  | 0.263 | 1.83E-03 | 1.10E-142 | 8.37E-04 | 359.22 |
| 15 | 75174251  | rs117968677 | A | G | -0.0310 | 0.024 | 5.52E-03 | 1.90E-08  | 4.55E-05 | 19.51  |
| 16 | 53800954  | rs1421085   | C | T | 0.0185  | 0.404 | 1.64E-03 | 1.70E-29  | 1.66E-04 | 71.00  |
| 16 | 70927078  | rs8056750   | T | C | 0.0105  | 0.359 | 1.74E-03 | 1.30E-09  | 5.11E-05 | 21.90  |
| 17 | 46155786  | rs62064918  | T | C | -0.0103 | 0.245 | 1.88E-03 | 4.10E-08  | 3.93E-05 | 16.84  |
| 17 | 60150383  | rs57918684  | A | G | 0.0129  | 0.155 | 2.24E-03 | 8.60E-09  | 4.34E-05 | 18.63  |
| 18 | 40950954  | rs630194    | C | T | -0.0114 | 0.343 | 1.70E-03 | 2.30E-11  | 5.81E-05 | 24.93  |
| 18 | 55032486  | rs1942965   | C | T | -0.0089 | 0.505 | 1.62E-03 | 3.80E-08  | 3.96E-05 | 17.00  |
| 18 | 57852587  | rs476828    | C | T | 0.0173  | 0.237 | 1.90E-03 | 5.60E-20  | 1.09E-04 | 46.73  |
| 19 | 18495908  | rs75347775  | A | G | 0.0105  | 0.245 | 1.88E-03 | 2.70E-08  | 4.04E-05 | 17.31  |
| 19 | 41353107  | rs56113850  | C | T | 0.0127  | 0.578 | 1.63E-03 | 8.90E-15  | 7.83E-05 | 33.57  |
| 20 | 45840459  | rs6063085   | C | A | 0.0104  | 0.373 | 1.67E-03 | 4.50E-10  | 5.07E-05 | 21.75  |
| 20 | 62891820  | rs6062682   | T | C | 0.0104  | 0.465 | 1.64E-03 | 2.50E-10  | 5.35E-05 | 22.95  |
| 22 | 24870527  | rs17842490  | G | A | -0.0452 | 0.014 | 6.81E-03 | 3.30E-11  | 5.73E-05 | 24.58  |
| 22 | 41215672  | rs13054099  | C | T | -0.0108 | 0.261 | 1.84E-03 | 4.30E-09  | 4.48E-05 | 19.22  |
